# Supplementary material for: Experimental and theoretical investigations into the mechanisms of haliranium ion π-ligand exchange reactions with cyclic alkenes in the gas phase
Source: Royal Society of Chemistry journal article supplement (doi:10.1039/d1cp04494j), 2021-01-01
Supplement: d1cp04494j1.pdf [file d1cp04494j1.pdf]

## Experimental and Theoretical Investigations into the Mechanisms of Haliranium Ion $\pi$ -Ligand Exchange Reactions with Cyclic Alkenes in the Gas Phase

### SUPPORTING INFORMATION

*Samuel C. Brydon*<sup>1\*</sup>, *Gabriel da Silva*<sup>2</sup>, *Richard A.J. O'Hair*<sup>1</sup>, *Jonathan M. White*<sup>1\*</sup>.

1. School of Chemistry and Bio21 Institute of Molecular Science and Biotechnology, The University of Melbourne, Parkville, Victoria 3010, Australia
2. Chemical Engineering, The University of Melbourne, Parkville, Victoria 3010, Australia

\*Corresponding authors' emails: [brydons@student.unimelb.edu.au](mailto:brydons@student.unimelb.edu.au),  
[whitejm@unimelb.edu.au](mailto:whitejm@unimelb.edu.au)

|                                                                                                                                          | <b>Page</b>         |
|------------------------------------------------------------------------------------------------------------------------------------------|---------------------|
| <b>Experimental:</b> description of ion-molecule line set up                                                                             | <b>S3</b>           |
| <b>Figure S1:</b> Schematic of apparatus for ion-molecule reactions                                                                      | <b>S3</b>           |
| <b>Table S1:</b> Permanent dipole moments and polarizabilities of neutrals for ADO theory                                                | <b>S4</b>           |
| <b>Figure S2:</b> MS <sup>3</sup> CID of ammonium ions <b>10.Br</b> and <b>10.I</b> (LTQ and Orbitrap)                                   | <b>S4</b>           |
| <b>Table S2:</b> HRMS assignments of ions in Figure S2                                                                                   | <b>S5</b>           |
| <b>Figure S3:</b> HRMS MS <sup>3</sup> IMR of <b>6.Br</b> and <b>6.I</b> with cyclohexene ( <b>Figure 1</b> )                            | <b>S5</b>           |
| <b>Table S3:</b> HRMS assignments of ions in Figure S3                                                                                   | <b>S6</b>           |
| <b>Figure S4:</b> HRMS MS <sup>3</sup> IMR of <b>6.Br</b> and <b>6.I</b> with cyclohexene-d <sub>10</sub> ( <b>Figure 1</b> )            | <b>S6</b>           |
| <b>Table S4:</b> HRMS assignments of ions in Figure S3                                                                                   | <b>S7</b>           |
| <b>Figure S5:</b> Early onset of the IMR between <b>6.Br</b> or <b>6.I</b> and cyclohexene                                               | <b>S8</b>           |
| <b>Figure S6:</b> Branching ratio plots of the IMR between <b>6.Br</b> and <b>6.I</b> and cyclohexene                                    | <b>S9</b>           |
| <b>Figure S7:</b> MS <sup>3</sup> IMR of <b>6.Br</b> with <i>cis</i> -cyclooctene                                                        | <b>S10</b>          |
| <b>Figure S8:</b> HRMS MS <sup>3</sup> IMR of <b>6.I</b> with <i>cis</i> -cyclooctene ( <b>Figure 6</b> )                                | <b>S10</b>          |
| <b>Table S5:</b> HRMS assignments of ions in Figure S8                                                                                   | <b>S10</b>          |
| <b>Figure S9:</b> Early onset of the IMR between <b>6.I</b> and <i>cis</i> -cyclooctene                                                  | <b>S11</b>          |
| <b>Figure S10:</b> Branching ratio plots of the IMR between <b>6.I</b> and <i>cis</i> -cyclooctene                                       | <b>S11</b>          |
| <b>Figure S11:</b> MS <sup>3</sup> IMR of <b>6.I</b> with styrene (LTQ and Orbitrap)                                                     | <b>S12</b>          |
| <b>Table S6:</b> HRMS assignments of ions in Figure S11                                                                                  | <b>S12</b>          |
| <b>Figures S12-14:</b> MS <sup>3</sup> and MS <sup>4</sup> IMR of 6.I with 50:50 cyclohexene:styrene                                     | <b>S13-<br/>S15</b> |
| <b>Figures S15-17:</b> MS <sup>3</sup> and MS <sup>4</sup> IMR of 6.I with 50:50 <i>cis</i> -cyclooctene:styrene                         | <b>S16-<br/>S17</b> |
| <b>Gaussian Cartesian Coordinates and Energies</b> (M06-2X-D3/def2-TZVP)                                                                 | <b>S18-<br/>S61</b> |
| <b>Orca Cartesian Coordinates and Energies</b> ( $\omega$ B97X-D3/def2-TZVP)                                                             | <b>S61-<br/>S71</b> |
| <b>Table S7:</b> Comparison of M06-2X-D3 and $\omega$ B97X-D3 enthalpies for key species involved in the addition pathways from Figure 3 | <b>S71</b>          |
| <b>References</b>                                                                                                                        | <b>S71-<br/>S72</b> |

## Experimental

A known flow of helium ( $500\text{--}1200\text{ cm}^3\text{ min}^{-1}$ ; 99.999%, Coregas) is passed through a copper tube ( $\sim 3\text{ m}$ ), and a measured flow of neutral reagent ( $1\text{--}10\text{ }\mu\text{L hr}^{-1}$ ) is injected *via* a septum downstream from a gas tight syringe using a syringe drive (Pump 11 Elite, Harvard Apparatus). The helium pressure regulator that controls the flow of helium into the ion trap under normal operating conditions is bypassed, and instead the helium pressure is controlled manually by matching the pressure in the vacuum chamber surrounding the ion trap ( $2 \times 10^{-5}\text{ Torr}$ ), measured using an ion gauge, to that under normal operating conditions. The injection port and subsequent, coiled copper tubing is heated to about  $20\text{--}30^\circ\text{C}$  above the boiling point of the corresponding neutral to ensure efficient vaporisation of the reagent into the helium flow. This is achieved by applying a variable voltage ( $0\text{--}260\text{V}$ ) to heating tape wrapped around the copper tubing (Powertech Variac SRV – 5).

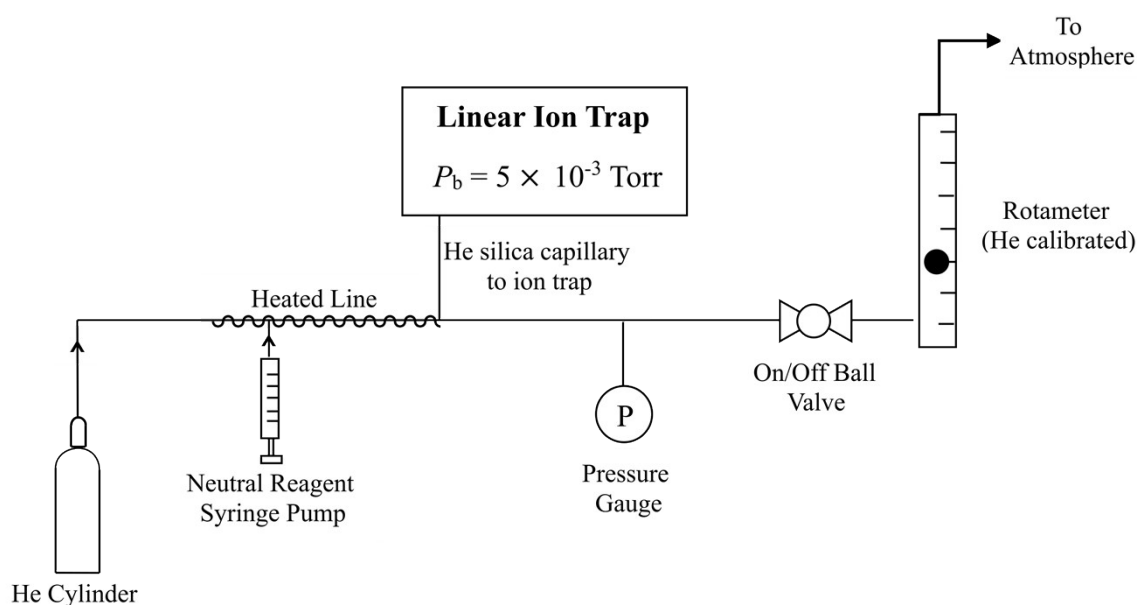

**Figure S1.** Schematic of apparatus utilized to add neutral reagents to the ion trap for ion-molecule reactions *via* the helium gas line.

The composition of this external mixture is calculated using the known molar flow rates of helium and neutral reagent. A small fraction of this mixture is carried through a silica capillary into the ion trap, whilst the remainder exits through a flowmeter (P single flow tube rotameter, He calibrated, Aalborg) allowing variation of the helium flowrate. The restriction capillary maintains the pressure of the ion trap at  $P_b = 5 \times 10^{-3}\text{ Torr}$  in the region where IMR occur.<sup>1</sup> This mixture of helium and neutral reagent effuse out of the ion trap into the vacuum manifold and since the lighter helium atoms effuse more rapidly and are lost at greater rate, then the steady-state solution of the differential equations describing the molar flow of neutral reagents about the ion trap (i.e. the “flux” of neutral reagents) allows the equilibrium pressure of neutral reagents,  $P_n$  (Torr), to be calculated (Eq. S1).<sup>2</sup> Once an appropriate flow of this mixture was established, the reagent pressure was allowed to equilibrate (typically  $1\text{--}2$  hours) prior to kinetic measurements.

$$P_n = P_b \times \frac{\text{molar flow rate of neutral}}{\text{molar flow rate of helium}} \times \sqrt{\frac{\text{molar mass of neutral}}{\text{molar mass of helium}}}$$

**Eq. S1**

### Theoretical Collision Rates – Average Dipole Orientation (ADO) Theory

The ADO rate,  $k_{\text{ADO}}$ , is dependent on the charge of the ion ( $q$ ), the reduced mass of the reactants ( $\mu$ ), the polarizability ( $\alpha$ ) and permanent dipole moment ( $\mu_{\text{D}}$ ) of the neutral, and can be calculated according to the following equation S2:

$$k_{\text{ADO}} = (2\pi q / \mu^{1/2}) [\alpha^{1/2} + C\mu_{\text{D}}(2/\pi kT)^{1/2}], \quad \text{Eq. S2}$$

where  $C$  has been parametrized to have a value between 0 and 1 with the expression  $f(\mu_{\text{D}}/\alpha^{1/2})$ . Experimental data has been used for the polarizability and permanent dipole moment where available, but the polarizability has not been measured for *cis*-cyclooctene (**Table S1**). Instead, this quantity has been calculated from the atomic hybrid polarisabilities (ahp) using the additivity method discussed by Miller,<sup>3</sup> with comparison included for cyclohexene.

**Table S1.** Experimental permanent dipole moments ( $\mu$ ) and comparison of experimental and calculated polarizabilities ( $\alpha$ ) for cyclohexene and *cis*-cyclooctene

| Neutral                 | $\mu_{\text{D}}$ (D)         |                           | $\alpha$ (amu Å <sup>2</sup> ) |                         |
|-------------------------|------------------------------|---------------------------|--------------------------------|-------------------------|
|                         | Experimental <sup>4, 5</sup> | Experimental <sup>6</sup> | Experimental <sup>6</sup>      | Calculated <sup>3</sup> |
| Cyclohexene             | 0.331                        | 10.73                     | 10.73                          | 10.82                   |
| <i>cis</i> -Cyclooctene | 0.43                         |                           |                                | 14.49 <sup>#</sup>      |

<sup>#</sup>calculated from (2 CTR × 1.352 ahp) + (6 CTE × 1.061 ahp) + (14 H × 0.387 ahp). See SI reference 3 for further information.

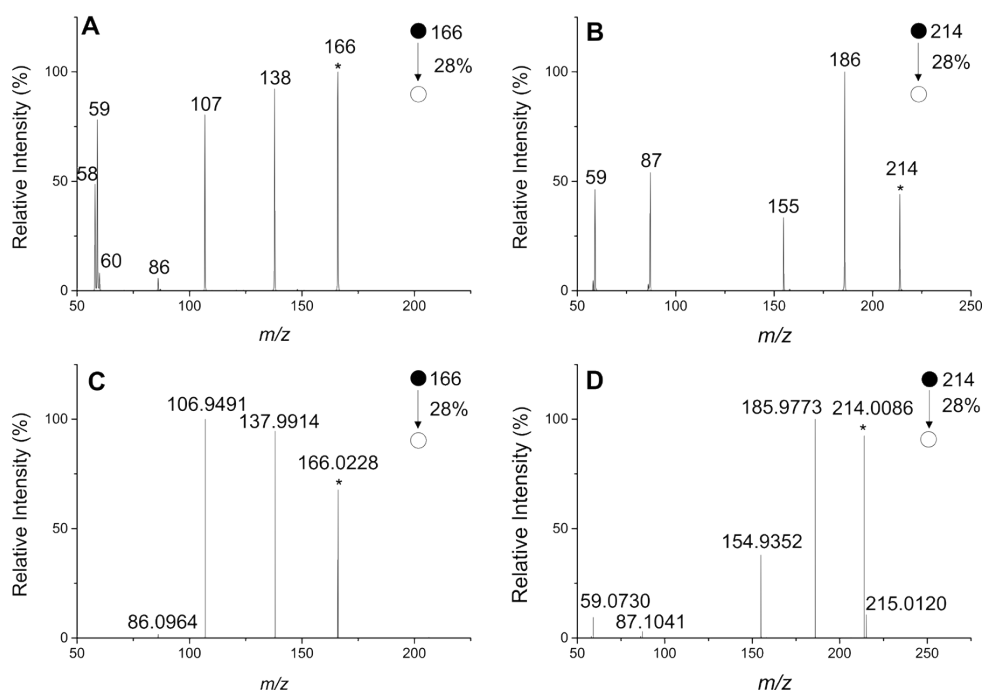

**Figure S2.** MS<sup>2</sup> of (A) CID of (2-bromoethyl)trimethylammonium ion, <sup>79</sup>BrCH<sub>2</sub>CH<sub>2</sub>NMe<sub>3</sub><sup>+</sup> **10.Br** (*m/z* 166, \*), to give the bromiranium ion, *c*-C<sub>2</sub>H<sub>4</sub>Br<sup>+</sup> **6.Br** (*m/z* 107), and (B) CID of (2-iodoethyl)trimethylammonium ion, ICH<sub>2</sub>CH<sub>2</sub>NMe<sub>3</sub><sup>+</sup> **10.I** (*m/z* 214, \*) to give the iodiranium ion, *c*-C<sub>2</sub>H<sub>4</sub>I<sup>+</sup> **6.I** (*m/z* 155), at an NCE of 28% and *t* = 10 ms. High-resolution MS<sup>2</sup> spectra of (A) and (B) are provided in (C) and (D) respectively

**Table S2.** HRMS experiments confirming assignments of key ion formulae for the MS<sup>2</sup> CID of the (2-bromoethyl)trimethylammonium ion **10.Br**, *m/z* 166, (Figure S2C), and MS<sup>2</sup> CID of the (2-iodoethyl)trimethylammonium ion **10.I**, *m/z* 214, (Figure S2D).

| Ion                                                             | Molecular Formula           | Exact mass – calculated ( <i>m/z</i> ) | Exact mass – experimental ( <i>m/z</i> ) | Mass error (ppm) |
|-----------------------------------------------------------------|-----------------------------|----------------------------------------|------------------------------------------|------------------|
| BrCH <sub>2</sub> CH <sub>2</sub> NMe <sub>3</sub> <sup>+</sup> | C5 H13 <sup>79</sup> Br1 N1 | 166.0226                               | 166.0228                                 | 1.2              |
| BrNMe <sub>3</sub> <sup>+</sup>                                 | C3 H9 <sup>79</sup> Br1 N1  | 137.9913                               | 137.9914                                 | 0.7              |
| <i>c</i> -BrCH <sub>2</sub> CH <sub>2</sub> <sup>+</sup>        | C2 H4 <sup>79</sup> Br1     | 106.9491                               | 106.9491                                 | 0                |
| CH <sub>2</sub> CHNMe <sub>3</sub> <sup>+</sup>                 | C5 H12 N1                   | 86.0964                                | 86.0964                                  | 0                |
| ICH <sub>2</sub> CH <sub>2</sub> NMe <sub>3</sub> <sup>+</sup>  | C5 H13 I1 N1                | 214.0088                               | 214.0086                                 | -0.9             |
|                                                                 | Isotope                     | 215.0121                               | 215.0120                                 | -0.5             |
| INMe <sub>3</sub> <sup>+</sup>                                  | C3 H9 I1 N1                 | 185.9774                               | 185.9773                                 | -0.5             |
| <i>c</i> -ICH <sub>2</sub> CH <sub>2</sub> <sup>+</sup>         | C2 H4 I1                    | 154.9352                               | 154.9352                                 | 0                |
| CH <sub>3</sub> CHNMe <sub>3</sub> <sup>+</sup>                 | C5 H13 N1                   | 87.1043                                | 87.1041                                  | -2.3             |
| N(CH <sub>3</sub> ) <sub>3</sub> <sup>+</sup>                   | C3 H9 N1                    | 59.0730                                | 59.0730                                  | 0                |

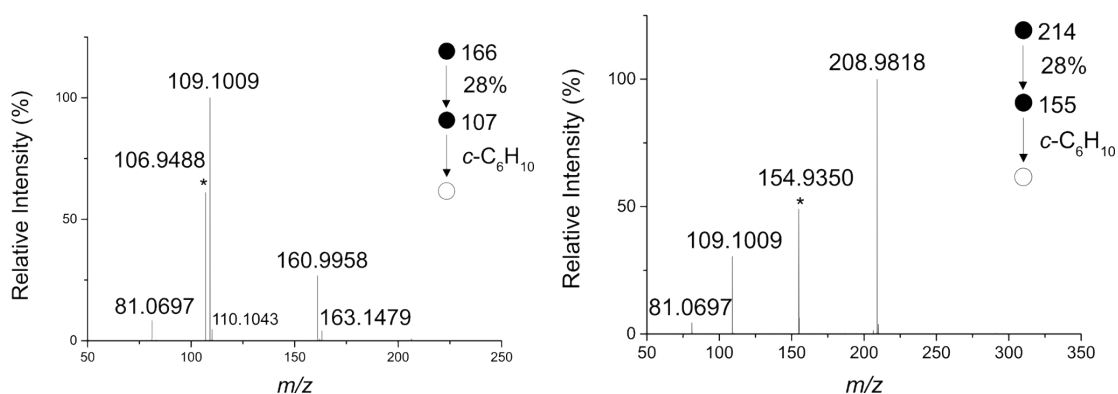

**Figure S3.** High-resolution MS<sup>3</sup> IMR of cyclohexene with (A) bromiranium ion **6.Br**, *m/z* 107 (\*), and (B) iodiranium ion **6.I**, *m/z* 155 (\*) shown in Figure 1A and B.

**Table S3.** HRMS experiments confirming assignments of key ion formulae for the MS<sup>3</sup> IMR of cyclohexene with bromiranium ion **6.Br**,  $m/z$  107 (**Figure S3A**), and iodiranium ion **6.I**,  $m/z$  155 (**Figure S3B**).

| Ion                   | Molecular Formula        | Exact mass – calculated ( $m/z$ ) | Exact mass – experimental ( $m/z$ ) | Mass error (ppm) |
|-----------------------|--------------------------|-----------------------------------|-------------------------------------|------------------|
| $C_{12}H_{19}^+$      | C12 H19                  | 163.1481                          | 163.1479                            | -1.2             |
| $c-C_6H_{10}Br^+$     | C6 H10 <sup>79</sup> Br1 | 160.9960                          | 160.9958                            | -1.2             |
| $c-C_6H_{10}CHCH_2^+$ | C8 H13                   | 109.1012                          | 109.1009                            | -2.7             |
|                       | Isotope                  | 110.1046                          | 110.1043                            | -2.7             |
| $c-CH_2CH_2Br^+$      | C2 H4 <sup>79</sup> Br1  | 106.9491                          | 106.9488                            | -2.8             |
| $c-C_6H_9^+$          | C6 H9                    | 81.0699                           | 81.0697                             | -2.5             |
| $c-C_6H_{10}I^+$      | C6 H10 I1                | 208.9822                          | 208.9818                            | -1.9             |
| $c-CH_2CH_2I^+$       | C2 H4 I1                 | 154.9352                          | 154.9350                            | -1.3             |
| $c-C_6H_{10}CHCH_2^+$ | C8 H13                   | 109.1012                          | 109.1009                            | -2.7             |
| $c-C_6H_9^+$          | C6 H9                    | 81.0699                           | 81.0697                             | -2.5             |

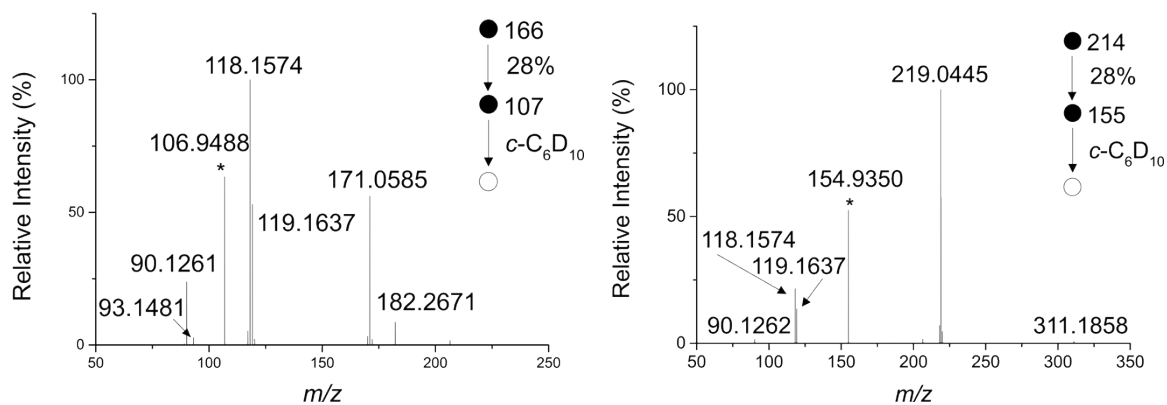

**Figure S4.** High-resolution MS<sup>3</sup> IMR of cyclohexene- $d_{10}$  with (A) bromiranium ion **6.Br**,  $m/z$  107 (\*), and (B) iodiranium ion **6.I**,  $m/z$  155 (\*) shown in **Figure 1C** and **D**.

**Table S4.** HRMS experiments confirming assignments of key ion formulae for the MS<sup>3</sup> IMR of cyclohexene-d<sub>10</sub> with bromiranium ion **6.Br**, *m/z* 107 (**Figure S4A**), and iodiranium ion **6.I**, *m/z* 155 (**Figure S4B**).

| <b>Ion</b>                                                              | <b>Molecular Formula</b> | <b>Exact mass – calculated (<i>m/z</i>)</b> | <b>Exact mass – experimental (<i>m/z</i>)</b> | <b>Mass error (ppm)</b> |
|-------------------------------------------------------------------------|--------------------------|---------------------------------------------|-----------------------------------------------|-------------------------|
| C <sub>12</sub> D <sub>19</sub> <sup>+</sup>                            | C12 D19                  | 182.2674                                    | 182.2671                                      | -1.6                    |
| <i>c</i> -C <sub>6</sub> D <sub>10</sub> Br <sup>+</sup>                | C6 D10 <sup>79</sup> Br1 | 171.0588                                    | 171.0585                                      | -1.8                    |
| <i>c</i> -C <sub>6</sub> D <sub>10</sub> CHCH <sub>2</sub> <sup>+</sup> | C8 H3 D10                | 119.1639                                    | 119.1637                                      | -1.7                    |
| <i>c</i> -C <sub>6</sub> D <sub>9</sub> HCHCH <sub>2</sub> <sup>+</sup> | C8 H4 D9                 | 118.1577                                    | 118.1574                                      | -2.5                    |
| <i>c</i> -CH <sub>2</sub> CH <sub>2</sub> Br <sup>+</sup>               | C2 H4 <sup>79</sup> Br1  | 106.9491                                    | 106.9488                                      | -2.8                    |
| <i>c</i> -CHD <sub>10</sub> <sup>+</sup>                                | C6 H D10                 | 93.1483                                     | 93.1481                                       | -2.1                    |
| <i>c</i> -C <sub>6</sub> D <sub>9</sub> <sup>+</sup>                    | C6 D9                    | 90.1264                                     | 90.1261                                       | -3.3                    |
| C <sub>12</sub> D <sub>20</sub> I <sup>+</sup>                          | C12 D20 I1               | 311.1860                                    | 311.1858                                      | -0.6                    |
| <i>c</i> -C <sub>6</sub> D <sub>10</sub> I <sup>+</sup>                 | C6 D10 I1                | 219.0449                                    | 219.0445                                      | -1.8                    |
| <i>c</i> -CH <sub>2</sub> CH <sub>2</sub> I <sup>+</sup>                | C2 H4 I1                 | 154.9352                                    | 154.9350                                      | -1.3                    |
| <i>c</i> -C <sub>6</sub> D <sub>10</sub> CHCH <sub>2</sub> <sup>+</sup> | C8 H3 D10                | 119.1639                                    | 119.1637                                      | -1.7                    |
| <i>c</i> -C <sub>6</sub> D <sub>9</sub> HCHCH <sub>2</sub> <sup>+</sup> | C8 H4 D9                 | 118.1577                                    | 118.1574                                      | -2.5                    |
| <i>c</i> -C <sub>6</sub> D <sub>9</sub> <sup>+</sup>                    | C6 D9                    | 90.1264                                     | 90.1262                                       | -2.2                    |

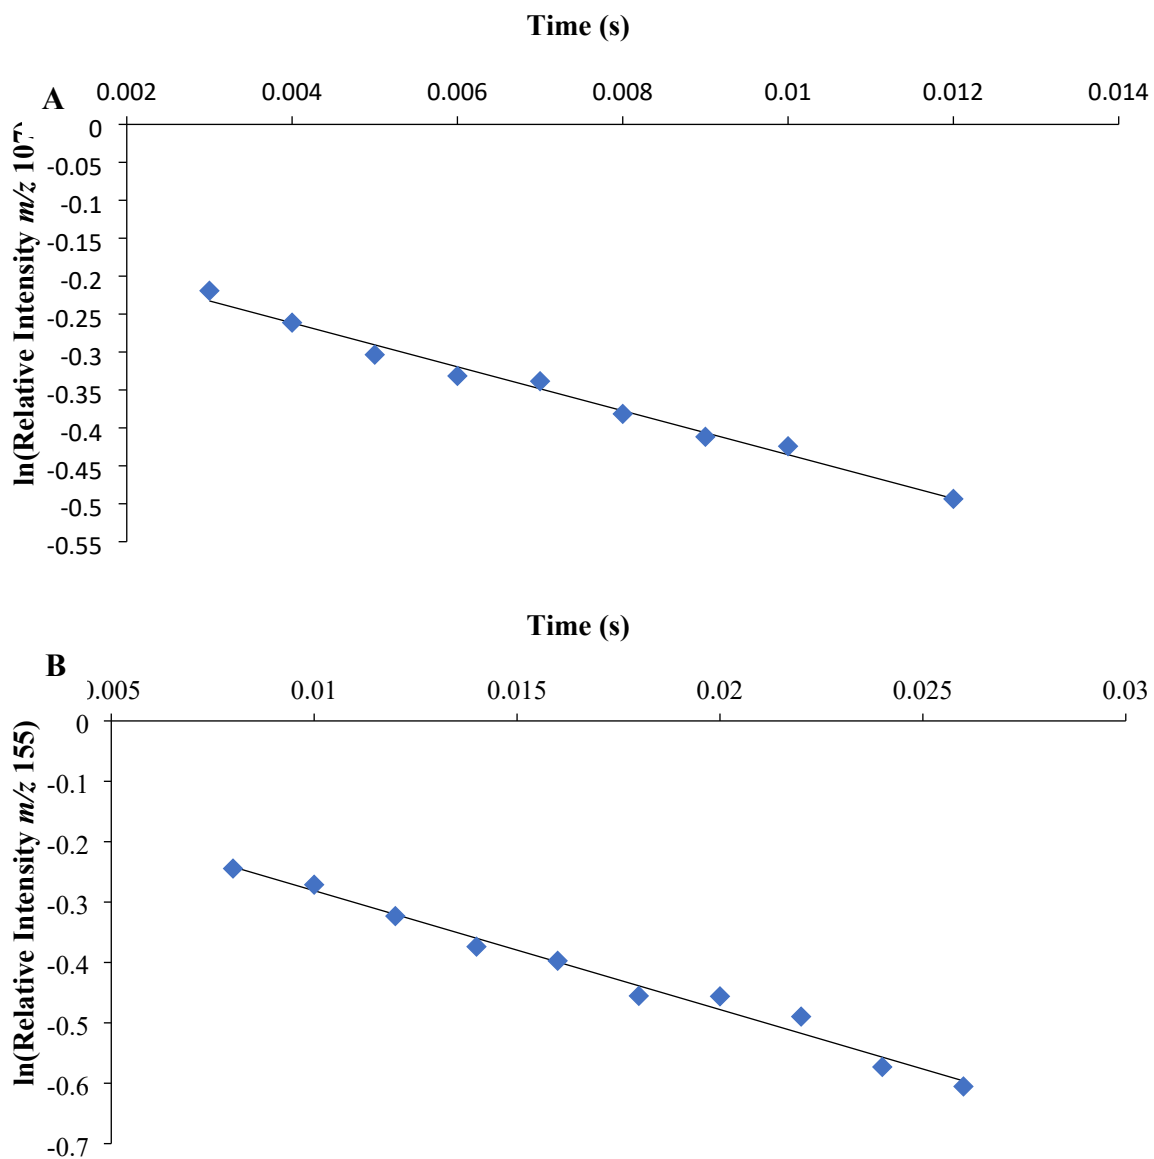

**Figure S5.** Early onset of the reaction of (A) bromiranium ion **6.Br** ( $m/z$  107) with  $c$ -C<sub>6</sub>H<sub>10</sub> (conc.  $ca$   $1.97 \times 10^{10}$  molecule  $cm^{-3}$ ) and (B) iodonium ion **6.I** ( $m/z$  155) with  $c$ -C<sub>6</sub>H<sub>10</sub> (conc.  $ca$   $1.74 \times 10^{10}$  molecule  $cm^{-3}$ ) in the ion trap mass spectrometer.



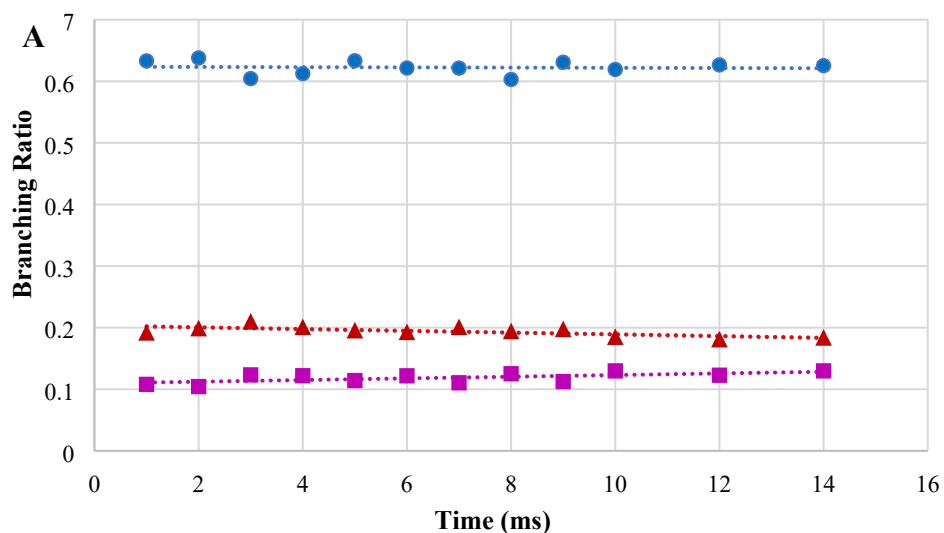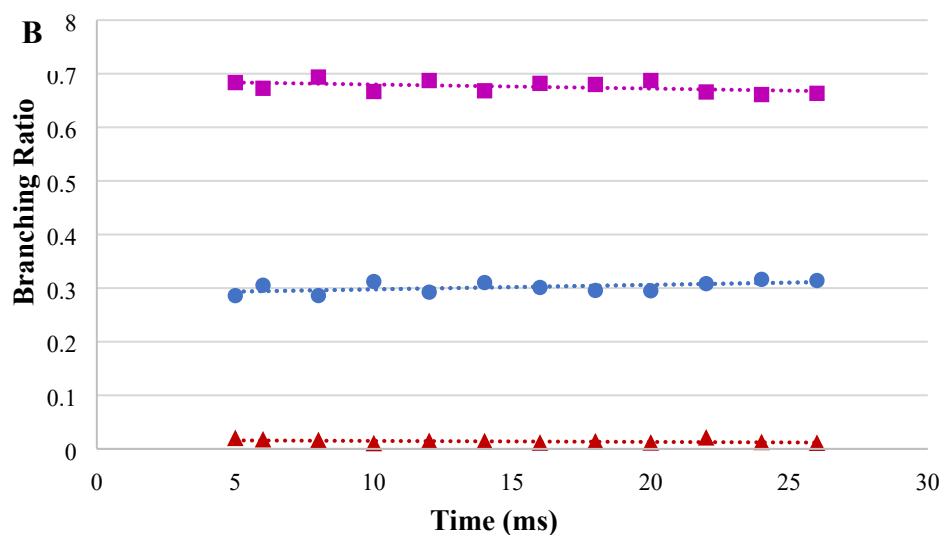

**Figure S6.** Branching ratio plot of  $\pi$ -ligand exchange (Br:  $m/z$  161; I:  $m/z$  209, pink squares), addition-elimination ( $m/z$  109, blue circles), and hydride transfer ( $m/z$  81, red triangles) products from reaction of (A) bromiranium ion **6.Br** ( $m/z$  107) with  $c$ -C<sub>6</sub>H<sub>10</sub> (conc. *ca*  $1.97 \times 10^{10}$  molecule cm<sup>-3</sup>) and (B) iodiranium ion **6.I** ( $m/z$  155) with  $c$ -C<sub>6</sub>H<sub>10</sub> (conc. *ca*  $1.74 \times 10^{10}$  molecule cm<sup>-3</sup>) in the ion trap mass spectrometer

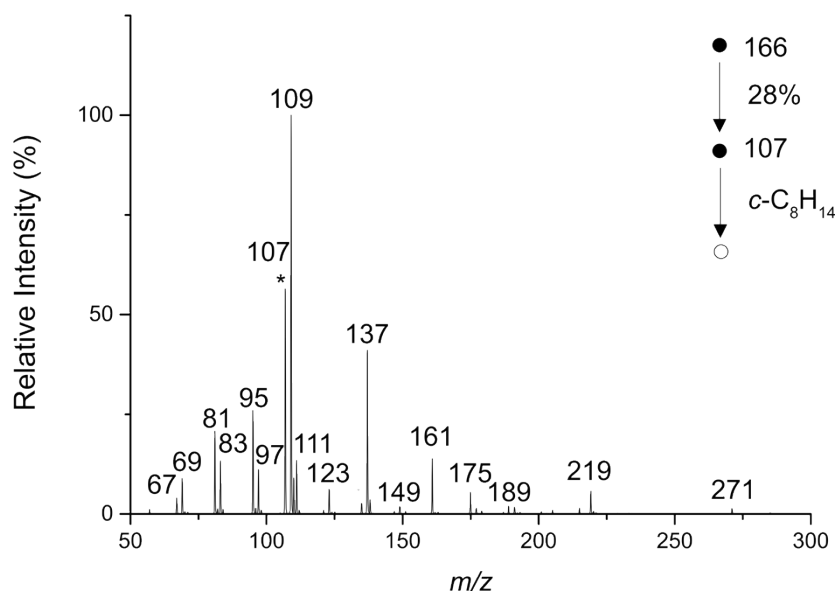

**Figure S7.** MS<sup>3</sup> IMR of *cis*-cyclooctene with bromiranium ion **6.Br**, *m/z* 107 (\*), at *t* = 25 ms. [*cis*-cyclooctene] =  $3.20 \times 10^{10}$  molecule cm<sup>-3</sup>.

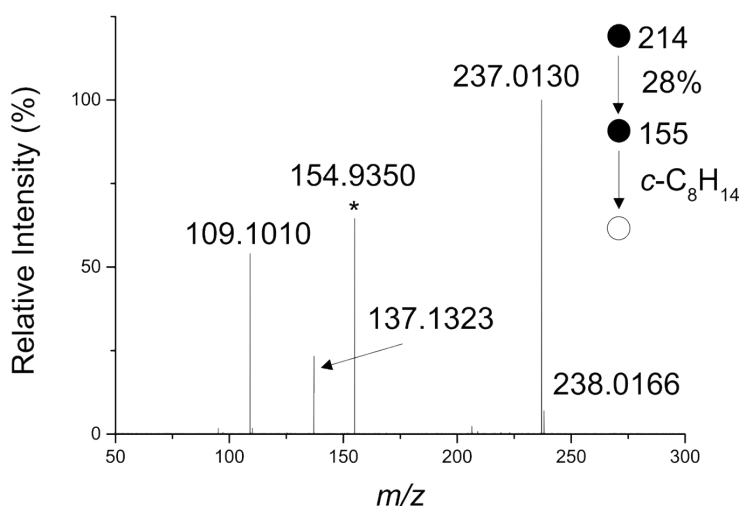

**Figure S8.** High-resolution MS<sup>3</sup> IMR of *cis*-cyclooctene iodiranium ion **6.I**, *m/z* 155 (\*) shown in **Figure 6**.

**Table S5.** HRMS experiments confirming assignments of key ion formulae for the MS<sup>3</sup> IMR of *cis*-cyclooctene with iodiranium ion **6.I**, *m/z* 155 (**Figure S8**)

| Ion                                                                     | Molecular Formula | Exact mass – calculated ( <i>m/z</i> ) | Exact mass – experimental ( <i>m/z</i> ) | Mass error (ppm) |
|-------------------------------------------------------------------------|-------------------|----------------------------------------|------------------------------------------|------------------|
| <i>c</i> -C <sub>8</sub> H <sub>14</sub> I <sup>+</sup>                 | C8 H14 I1         | 237.0135                               | 237.0130                                 | -2.1             |
|                                                                         | Isotope           | 238.0169                               | 238.0166                                 | -1.3             |
| <i>c</i> -CH <sub>2</sub> CH <sub>2</sub> I <sup>+</sup>                | C2 H4 I1          | 154.9352                               | 154.9350                                 | -1.3             |
| <i>c</i> -C <sub>8</sub> H <sub>14</sub> CHCH <sub>2</sub> <sup>+</sup> | C10 H17           | 137.1325                               | 137.1323                                 | -1.5             |

$c\text{-C}_8\text{H}_{13}^+$ 

C8 H13

109.1012

109.1010

-1.8

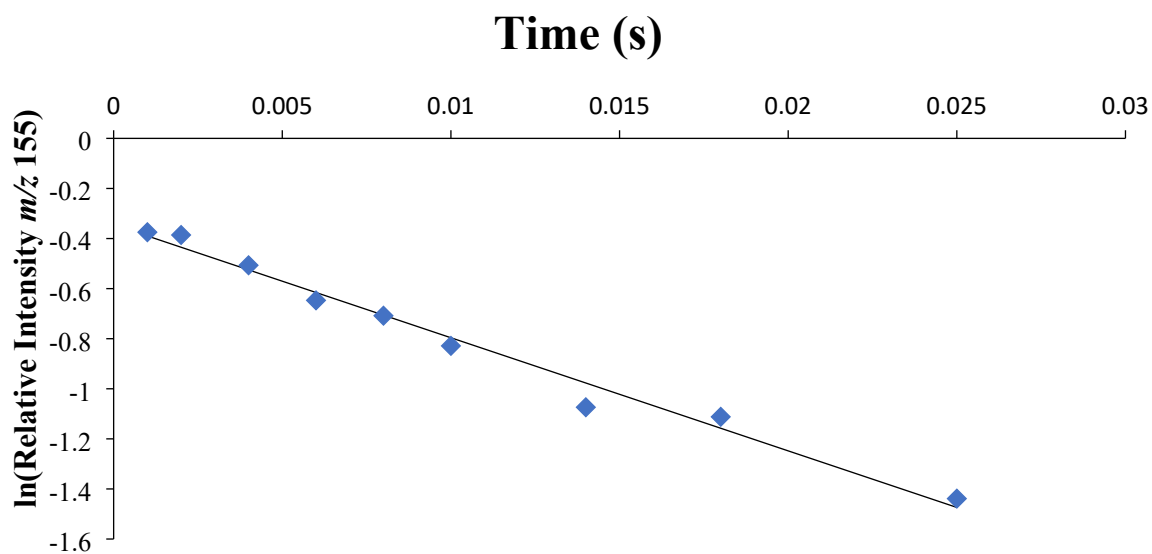

**Figure S9.** Early onset of the reaction of iodiranium ion **6.I** ( $m/z$  155) with  $c\text{-C}_8\text{H}_{14}$  (conc. *ca*  $3.20 \times 10^{10}$  molecule  $\text{cm}^{-3}$ ) in the ion trap mass spectrometer

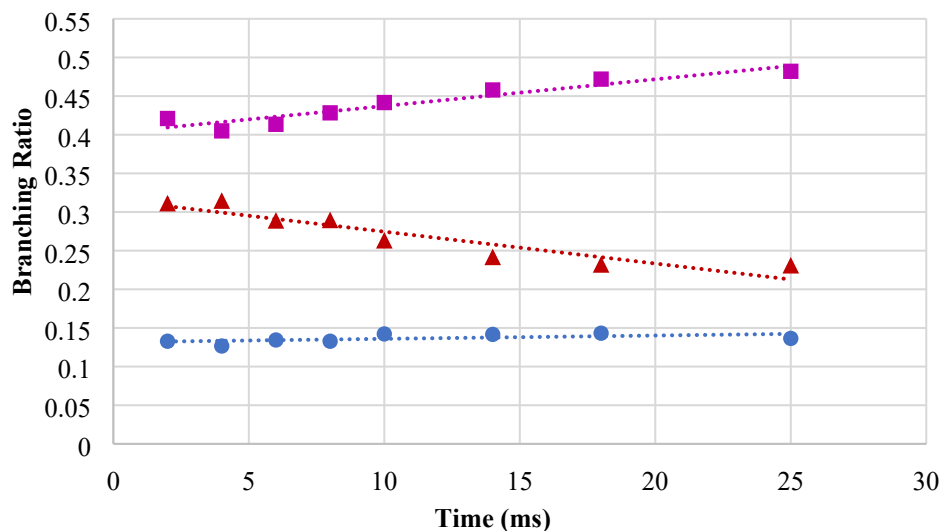

**Figure S10.** Branching ratio plot of  $\pi$ -ligand exchange ( $m/z$  237, pink squares), addition-elimination ( $m/z$  137, blue circles), and hydride transfer ( $m/z$  109, red triangles) products from reaction of iodiranium ion **6.I** ( $m/z$  155) with  $c\text{-C}_8\text{H}_{14}$  (conc. *ca*  $3.20 \times 10^{10}$  molecule  $\text{cm}^{-3}$ ) in the ion trap mass spectrometer

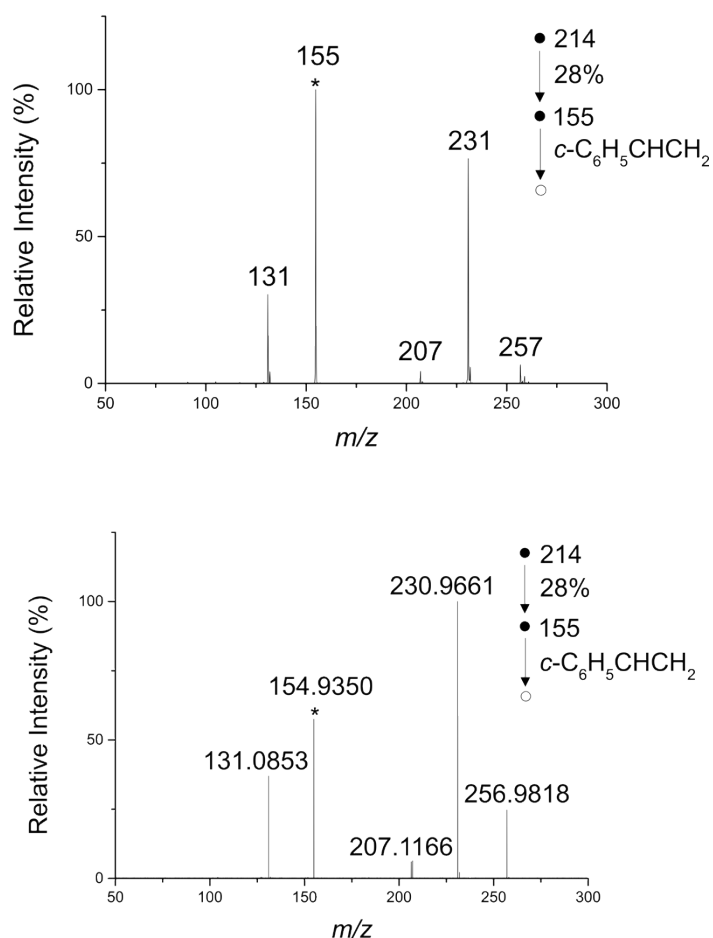

**Figure S11.** LTQ (top) and Orbitrap HRMS (bottom) MS<sup>3</sup> IMR of styrene with iodonium ion **6.I**,  $m/z$  155 (\*). [styrene] *ca.*  $10^{10}$  molecule  $\text{cm}^{-3}$ . Major products included:  $\pi$ -ligand exchange ( $m/z$  231), addition-elimination of HI ( $m/z$  131), and addition-elimination of H<sub>2</sub> ( $m/z$  257). The latter peak arises due to the feasibility of benzylic stabilization of the charge in the initial addition adduct with subsequent elimination of H<sub>2</sub> introducing additional allylic stabilization.  $m/z$  207 is styrene addition to a styryl cation followed by H<sub>2</sub> elimination.

**Table S6.** HRMS experiments confirming assignments of key ion formulae for the MS<sup>3</sup> IMR of styrene with iodonium ion **6.I**,  $m/z$  155 (**Figure S11**)

| Ion                                             | Molecular Formula | Exact mass – calculated ( $m/z$ ) | Exact mass – experimental ( $m/z$ ) | Mass error (ppm) |
|-------------------------------------------------|-------------------|-----------------------------------|-------------------------------------|------------------|
| $\text{C}_{10}\text{H}_{10}\text{I}^+$          | C10 H10 I1        | 256.9822                          | 256.9818                            | -1.6             |
| $c\text{-C}_6\text{H}_5\text{CHCH}_2\text{I}^+$ | C8 H8 I1          | 230.9665                          | 230.9661                            | -1.7             |
| $\text{C}_{16}\text{H}_{15}^+$                  | C16 H15           | 207.1168                          | 207.1166                            | -1.0             |
| $c\text{-CH}_2\text{CH}_2\text{I}^+$            | C2 H4 I1          | 154.9352                          | 154.9350                            | -1.3             |
| $\text{C}_{10}\text{H}_{11}^+$                  | C10 H11           | 131.0855                          | 131.0853                            | -1.5             |

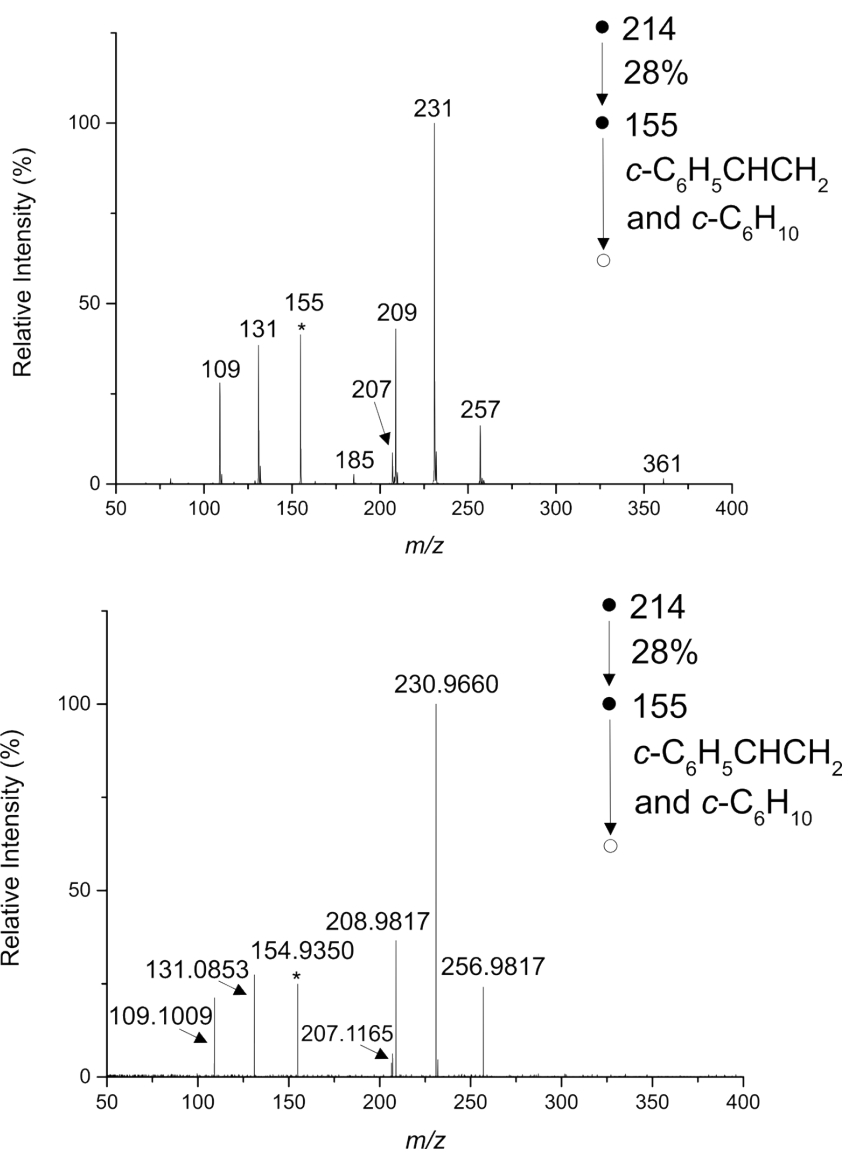

**Figure S12.** LTQ (top) and Orbitrap HRMS (bottom) MS<sup>3</sup> IMR of 50:50 cyclohexene:styrene mixture with iodiranium ion **6.I**,  $m/z$  155 (\*) at  $t = 15$  ms. [cyclohexene and styrene] *ca.*  $10^{10}$  molecule  $\text{cm}^{-3}$ .  $\pi$ -Ligand exchange products are at  $m/z$  209 (**12.I**) and  $m/z$  231 (**37.I**). Other products present in the IMR between **6.I** and cyclohexene include  $m/z$  109 (see **Figure 1B** and **Table S3**), whilst products present in the IMR between **6.I** and styrene include  $m/z$  131,  $m/z$  207 and  $m/z$  257 (see **Figure S11** and **Table S6**).

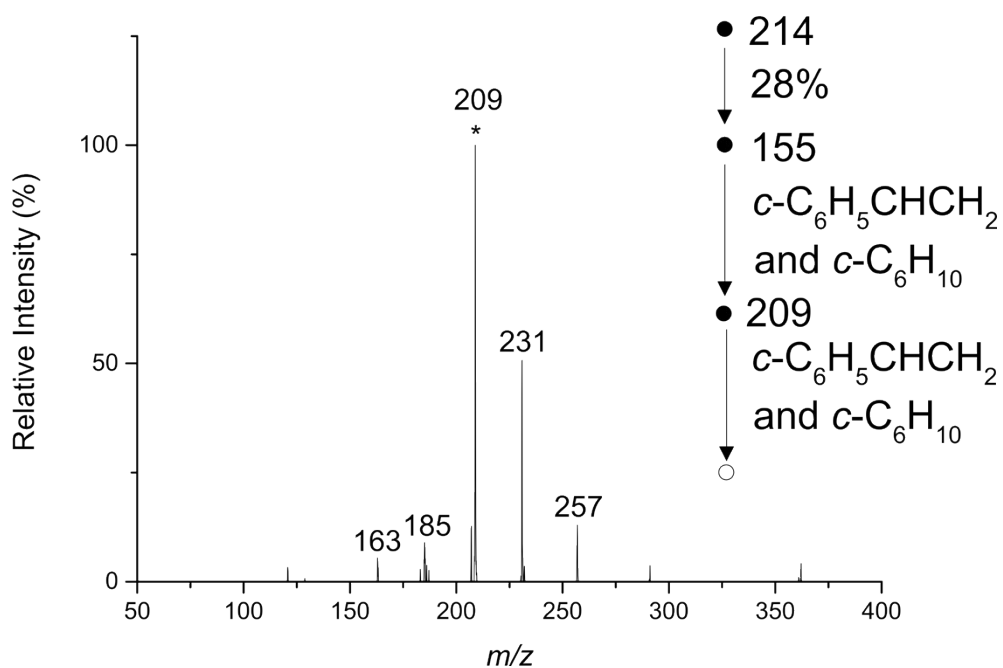

**Figure S13.** MS<sup>4</sup> IMR of 50:50 cyclohexene:styrene mixture with cyclohexyl iodonium ion **12.I**,  $m/z$  209 (\*). [cyclohexene and styrene] *ca.*  $10^{10}$  molecule  $\text{cm}^{-3}$ .  $\pi$ -Ligand exchange products are at  $m/z$  209 (**12.I**) and  $m/z$  231 (**37.I**). HRMS was not possible for this IMR due to the low signal, however, the high-resolution data present in **Figure S12** may be used to support the assignment of  $m/z$  231 as the ion **37.I**.

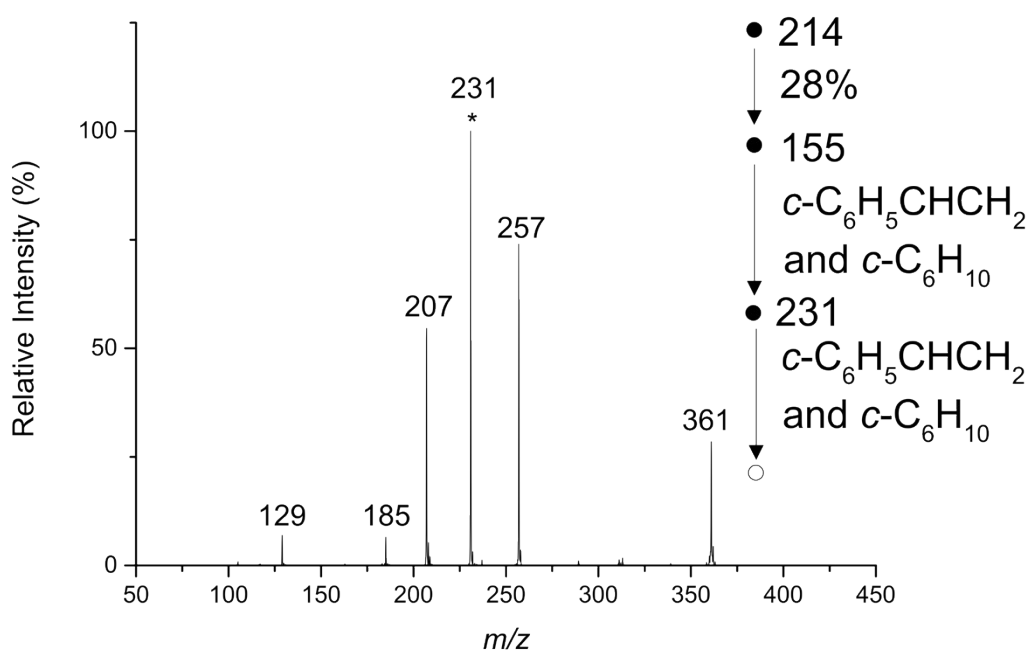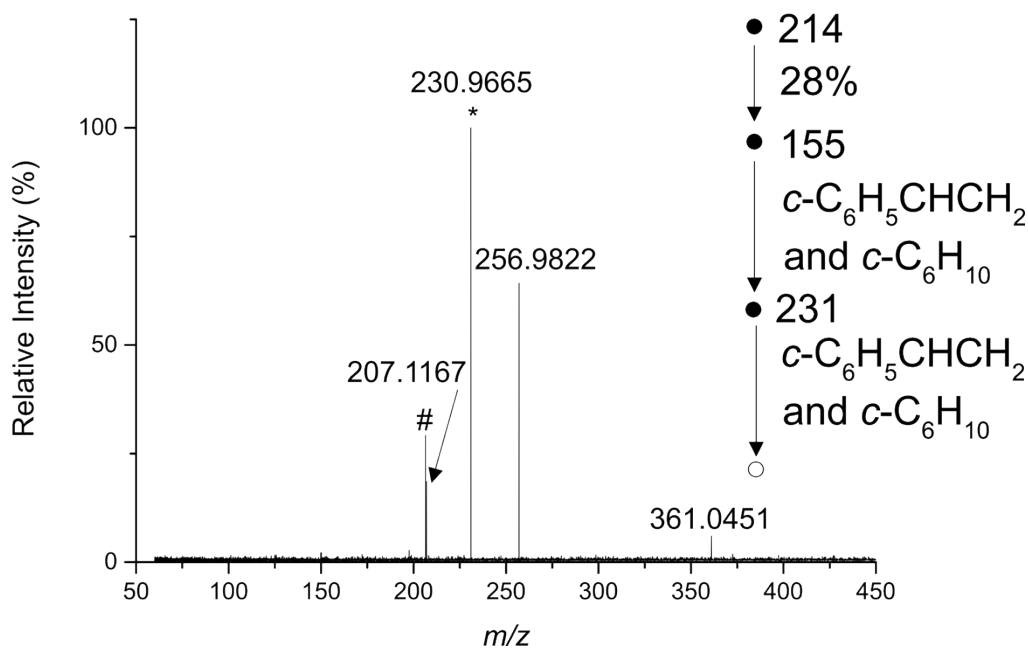

**Figure S14.** LTQ (top) and Orbitrap HRMS (bottom)  $\text{MS}^4$  IMR of 50:50 cyclohexene:styrene mixture with benzylic ion **37.I**,  $m/z$  231 (\*). [cyclohexene and styrene] *ca.*  $10^{10}$  molecule  $\text{cm}^{-3}$ .  $\pi$ -Ligand exchange product is **not** observed at  $m/z$  209 (**12.I**). Note that  $m/z$  257 may be produced by addition of styrene to  $m/z$  231 followed by elimination of benzene, with further addition of styrene to  $m/z$  257 giving  $m/z$  361. # is noise present in the Orbitrap.

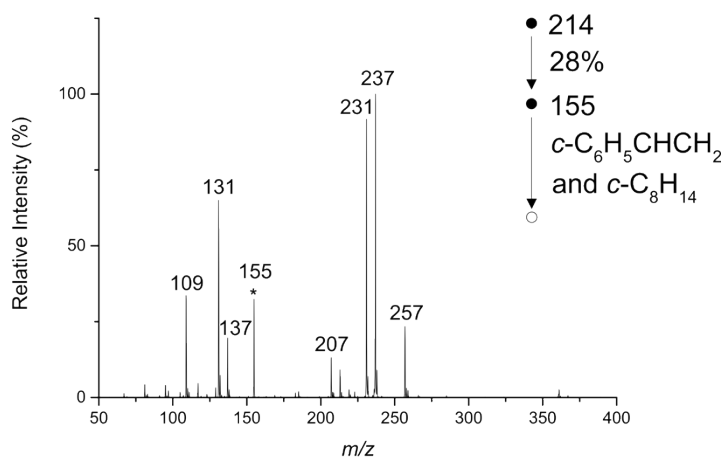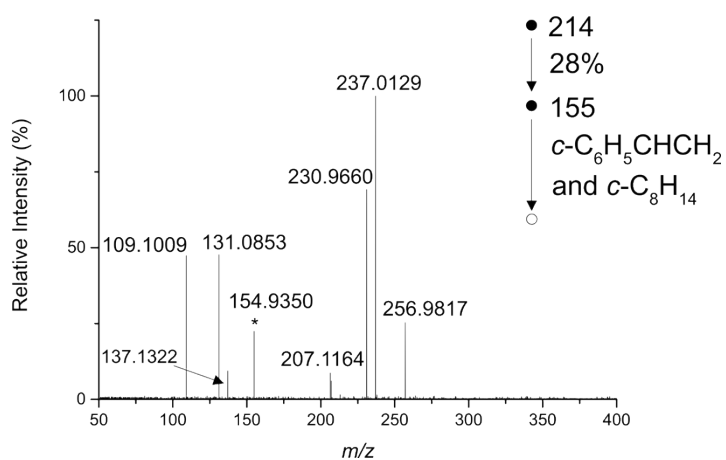

**Figure S15.** LTQ (top) and Orbitrap HRMS (bottom) MS<sup>3</sup> IMR of 50:50 *cis*-cyclooctene: styrene mixture with iodonium ion **6.I**,  $m/z$  155 (\*) at  $t = 20$  ms. [*cis*-cyclooctene and styrene] *ca.*  $10^{10}$  molecule  $\text{cm}^{-3}$ .  $\pi$ -Ligand exchange products are at  $m/z$  237 (**17.I**) and  $m/z$  231 (**37.I**). Other products present in the IMR between **6.I** and *cis*-cyclooctene include  $m/z$  109 and  $m/z$  137 (see **Figure 6** and **Table S5**), whilst products present in the IMR between **6.I** and styrene include  $m/z$  131,  $m/z$  207 and  $m/z$  257 (see **Figure S11** and **Table S6**).

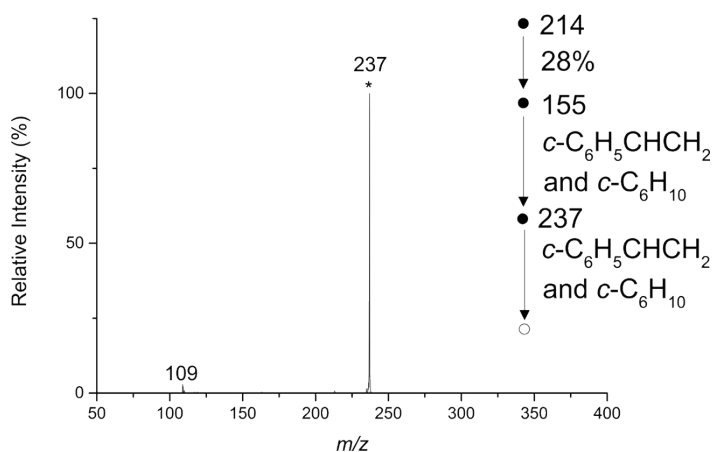



**Figure S16.** MS<sup>4</sup> IMR of 50:50 *cis*-cyclooctene:styrene mixture with cyclooctyl iodonium ion **17.I**, *m/z* 237 (\*). [*cis*-cyclooctene and styrene] *ca.* 10<sup>10</sup> molecule cm<sup>-3</sup>.  $\pi$ -Ligand exchange product is **not** observed at *m/z* 231 (**37.I**). HRMS was not possible for this IMR due to the low signal, however, the high-resolution data present in **Figure S15** may be used to support the assignment of *m/z* 237 as the ion **17.I**.

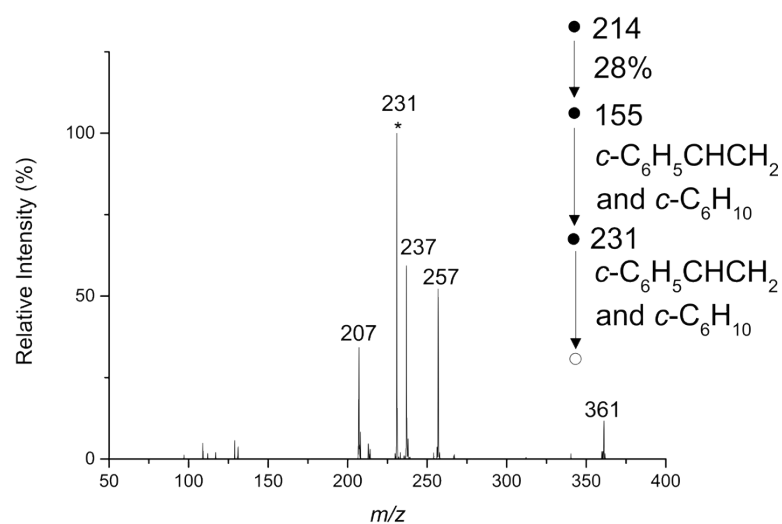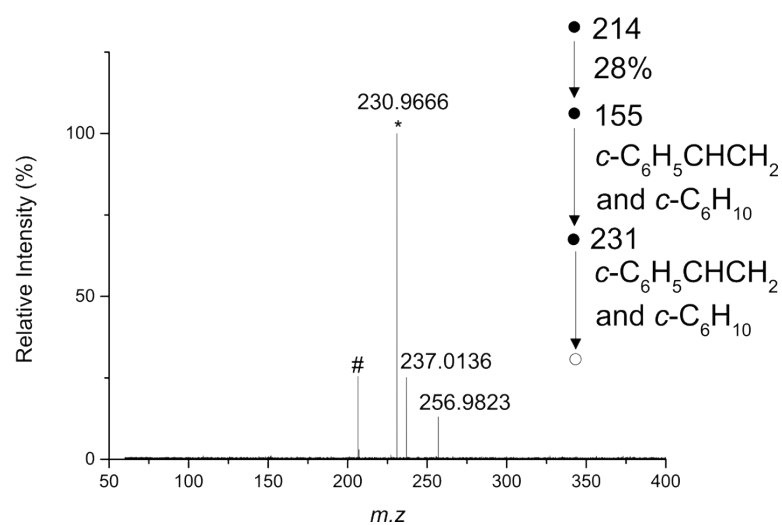

**Figure S17.** LTQ (top) and Orbitrap HRMS (bottom) MS<sup>4</sup> IMR of 50:50 *cis*-cyclooctene:styrene mixture with benzylic ion **37.I**, *m/z* 231 (\*). [*cis*-cyclooctene and styrene] *ca.* 10<sup>10</sup> molecule cm<sup>-3</sup>.  $\pi$ -Ligand exchange product is observed at *m/z* 237 (**17.I**). Note that *m/z* 257 may be produced by addition of styrene to *m/z* 231 followed by elimination of benzene, with further addition of styrene to *m/z* 257 giving *m/z* 361. # is noise present in the Orbitrap.

## Thermochemical Data and Optimized Cartesian Coordinates for Structures Calculated at M06-2X-D3/def2-TZVP

Figure 3

### Bromiranium Ion 6.Br

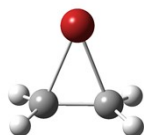

|                                              |                             |
|----------------------------------------------|-----------------------------|
| Zero-point correction=                       | 0.055189 (Hartree/Particle) |
| Thermal correction to Energy=                | 0.058729                    |
| Thermal correction to Enthalpy=              | 0.059673                    |
| Thermal correction to Gibbs Free Energy=     | 0.028585                    |
| Sum of electronic and zero-point Energies=   | -2652.404056                |
| Sum of electronic and thermal Energies=      | -2652.400516                |
| Sum of electronic and thermal Enthalpies=    | -2652.399572                |
| Sum of electronic and thermal Free Energies= | -2652.430660                |

|    |             |            |             |
|----|-------------|------------|-------------|
| C  | -2.14349000 | 0.65689000 | 0.28017200  |
| H  | -1.67484700 | 0.55824500 | -0.69126100 |
| H  | -3.08975300 | 0.15474600 | 0.43935100  |
| C  | -1.34707700 | 1.06033800 | 1.42112700  |
| H  | -0.29029000 | 1.25889300 | 1.29178600  |
| H  | -1.70605000 | 0.85567300 | 2.42227500  |
| Br | -2.38451300 | 2.61376400 | 0.67712500  |

### Cyclohexene

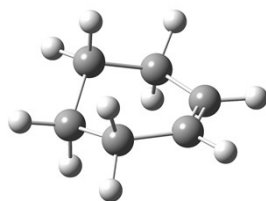

|                                              |             |
|----------------------------------------------|-------------|
| Zero-point correction=                       | 0.147369    |
| (Hartree/Particle)                           |             |
| Thermal correction to Energy=                | 0.152825    |
| Thermal correction to Enthalpy=              | 0.153769    |
| Thermal correction to Gibbs Free Energy=     | 0.119452    |
| Sum of electronic and zero-point Energies=   | -234.466759 |
| Sum of electronic and thermal Energies=      | -234.461303 |
| Sum of electronic and thermal Enthalpies=    | -234.460358 |
| Sum of electronic and thermal Free Energies= | -234.494675 |

|   |             |             |            |
|---|-------------|-------------|------------|
| C | -0.12529000 | -0.65215800 | 1.29651100 |
| C | 0.12529000  | 0.65215800  | 1.29651100 |
| C | 0.25861000  | 1.47078700  | 0.04227900 |

|   |             |             |             |
|---|-------------|-------------|-------------|
| C | -0.25861000 | 0.71771800  | -1.18101200 |
| C | 0.25861000  | -0.71771800 | -1.18101200 |
| C | -0.25861000 | -1.47078700 | 0.04227900  |
| H | -0.27916500 | 2.41426600  | 0.16408200  |
| H | 0.23623800  | 1.17126400  | 2.24270300  |
| H | -0.23623800 | -1.17126400 | 2.24270300  |
| H | -1.35256100 | 0.70079200  | -1.15576800 |
| H | 0.03295800  | 1.23625300  | -2.09567600 |
| H | -0.03295800 | -1.23625300 | -2.09567600 |
| H | 1.35256100  | -0.70079200 | -1.15576800 |
| H | -1.31033300 | -1.74335400 | -0.10200100 |
| H | 0.27916500  | -2.41426600 | 0.16408200  |
| H | 1.31033300  | 1.74335400  | -0.10200100 |

## 21.Br

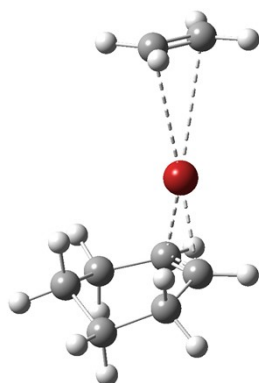

|                                              |              |
|----------------------------------------------|--------------|
| Zero-point correction=                       | 0.202016     |
| (Hartree/Particle)                           |              |
| Thermal correction to Energy=                | 0.213690     |
| Thermal correction to Enthalpy=              | 0.214634     |
| Thermal correction to Gibbs Free Energy=     | 0.161291     |
| Sum of electronic and zero-point Energies=   | -2886.905804 |
| Sum of electronic and thermal Energies=      | -2886.894130 |
| Sum of electronic and thermal Enthalpies=    | -2886.893186 |
| Sum of electronic and thermal Free Energies= | -2886.946529 |

|   |             |             |             |
|---|-------------|-------------|-------------|
| C | 2.00527900  | -0.78361600 | 0.47454000  |
| H | 1.95690200  | -1.15587100 | 1.49174600  |
| C | 1.98881200  | 0.64747400  | 0.29968900  |
| H | 1.95363200  | 1.26142400  | 1.19336600  |
| C | -2.93575200 | -0.29584400 | -0.79835600 |
| C | -3.07200000 | 0.06780600  | 0.47239000  |
| H | -3.17832200 | -0.66458800 | 1.26379100  |
| H | -2.92688700 | -1.33898900 | -1.09156400 |
| C | 2.51948900  | -1.70966600 | -0.59401900 |
| H | 3.20321700  | -2.39972100 | -0.09373100 |
| H | 1.69847200  | -2.32869000 | -0.95987400 |
| C | 2.45145700  | 1.27643100  | -0.97259800 |

|    |             |             |             |
|----|-------------|-------------|-------------|
| H  | 1.86386600  | 2.17107900  | -1.17970000 |
| H  | 3.46676200  | 1.62956800  | -0.74353700 |
| C  | 2.48934200  | 0.30043100  | -2.14319900 |
| H  | 1.47292800  | 0.07189900  | -2.47399400 |
| H  | 2.99255600  | 0.77646300  | -2.98308100 |
| C  | 3.22194300  | -0.97562200 | -1.74095900 |
| H  | 3.31277500  | -1.65256600 | -2.58845000 |
| H  | 4.23895700  | -0.71907600 | -1.43394100 |
| H  | -2.87196000 | 0.43682300  | -1.59413700 |
| H  | -3.12394900 | 1.11089400  | 0.76126500  |
| Br | 0.03315800  | -0.10741100 | 0.17659700  |

### Product 12.Br

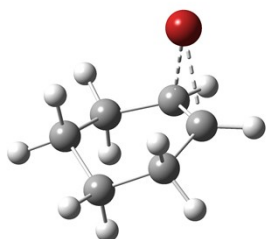

|                                              |              |
|----------------------------------------------|--------------|
| Zero-point correction=                       | 0.149468     |
| (Hartree/Particle)                           |              |
| Thermal correction to Energy=                | 0.156270     |
| Thermal correction to Enthalpy=              | 0.157214     |
| Thermal correction to Gibbs Free Energy=     | 0.117612     |
| Sum of electronic and zero-point Energies=   | -2808.376112 |
| Sum of electronic and thermal Energies=      | -2808.369309 |
| Sum of electronic and thermal Enthalpies=    | -2808.368365 |
| Sum of electronic and thermal Free Energies= | -2808.407967 |

|    |             |             |             |
|----|-------------|-------------|-------------|
| C  | -4.97747300 | -1.60076800 | -0.01626400 |
| C  | -3.45372000 | -1.62973200 | 0.01581000  |
| C  | -2.84285700 | -0.27605100 | 0.15230300  |
| C  | -3.62140800 | 0.84924000  | 0.64932200  |
| C  | -5.05465400 | 0.69233700  | 1.07870100  |
| C  | -5.51330800 | -0.76886000 | 1.14471300  |
| H  | -1.76234600 | -0.20194200 | 0.21908300  |
| H  | -3.10536700 | -2.16495500 | 0.91110300  |
| H  | -3.01356600 | -2.15231000 | -0.83378200 |
| H  | -5.32611700 | -1.20127300 | -0.97200900 |
| H  | -5.34920500 | -2.62183900 | 0.04908800  |
| H  | -3.06381600 | 1.69674000  | 1.03286800  |
| H  | -5.12679600 | 1.17055100  | 2.05875700  |
| H  | -5.69351100 | 1.28454300  | 0.42126400  |
| H  | -5.17125000 | -1.20996100 | 2.08415100  |
| H  | -6.60118200 | -0.79305800 | 1.16658100  |
| Br | -3.32380500 | 1.01147200  | -1.39701000 |

### Ethene

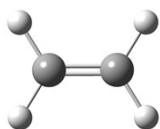

Zero-point correction= 0.051412  
 (Hartree/Particle)  
 Thermal correction to Energy= 0.054446  
 Thermal correction to Enthalpy= 0.055391  
 Thermal correction to Gibbs Free Energy= 0.029899  
 Sum of electronic and zero-point Energies= -78.520570  
 Sum of electronic and thermal Energies= -78.517535  
 Sum of electronic and thermal Enthalpies= -78.516591  
 Sum of electronic and thermal Free Energies= -78.542083

|   |             |             |            |
|---|-------------|-------------|------------|
| C | 0.00000000  | 0.66100900  | 0.00000000 |
| H | 0.92229300  | 1.22855200  | 0.00000000 |
| H | -0.92225200 | 1.22859300  | 0.00000000 |
| C | 0.00000000  | -0.66100900 | 0.00000000 |
| H | -0.92229300 | -1.22855200 | 0.00000000 |
| H | 0.92225200  | -1.22859300 | 0.00000000 |

## 22.Br

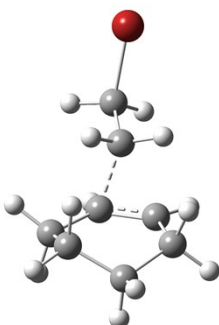

Zero-point correction= 0.206104  
 (Hartree/Particle)  
 Thermal correction to Energy= 0.215870  
 Thermal correction to Enthalpy= 0.216814  
 Thermal correction to Gibbs Free Energy= 0.169209  
 Sum of electronic and zero-point Energies= -2886.923459  
 Sum of electronic and thermal Energies= -2886.913693  
 Sum of electronic and thermal Enthalpies= -2886.912749  
 Sum of electronic and thermal Free Energies= -2886.960354

|   |             |             |             |
|---|-------------|-------------|-------------|
| C | -1.19761700 | -0.62872100 | 0.25847600  |
| H | -1.02114700 | -0.87415100 | 1.30346800  |
| C | -0.63807800 | 0.73303200  | -0.09812400 |
| H | 0.44947200  | 0.70845200  | 0.02799200  |
| H | -0.80488900 | 1.05729900  | -1.12287000 |
| C | -1.60950100 | 1.89034100  | 0.73405600  |
| C | -2.27338600 | 2.86955300  | -0.20309100 |

|    |             |             |             |
|----|-------------|-------------|-------------|
| C  | -0.31573500 | 2.10927400  | 1.21188700  |
| C  | -1.26859000 | 3.75441600  | -0.93669700 |
| H  | -2.93159200 | 3.48437200  | 0.41766900  |
| H  | -2.92214800 | 2.32858100  | -0.89392900 |
| C  | 0.54664400  | 3.23371000  | 0.73824900  |
| H  | 0.03366000  | 1.50312500  | 2.04320000  |
| C  | -0.25326400 | 4.33660300  | 0.04077200  |
| H  | -0.75160900 | 3.18746600  | -1.71693700 |
| H  | -1.80481400 | 4.55254500  | -1.44758800 |
| H  | 1.07196400  | 3.60910100  | 1.62042000  |
| H  | 1.33468400  | 2.84030900  | 0.08812300  |
| H  | -0.77580600 | 4.93050700  | 0.79432100  |
| H  | 0.43595200  | 5.00804700  | -0.46804400 |
| H  | -2.26637200 | 1.28219100  | 1.34755300  |
| H  | -2.25858900 | -0.69658700 | 0.03689500  |
| Br | -0.29708600 | -1.95975900 | -0.81395300 |

### TS23.Br

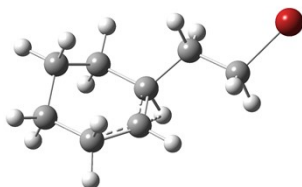

|                                              |              |
|----------------------------------------------|--------------|
| Zero-point correction=                       | 0.203399     |
| (Hartree/Particle)                           |              |
| Thermal correction to Energy=                | 0.212597     |
| Thermal correction to Enthalpy=              | 0.213541     |
| Thermal correction to Gibbs Free Energy=     | 0.167594     |
| Sum of electronic and zero-point Energies=   | -2886.917946 |
| Sum of electronic and thermal Energies=      | -2886.908748 |
| Sum of electronic and thermal Enthalpies=    | -2886.907804 |
| Sum of electronic and thermal Free Energies= | -2886.953751 |

|   |             |             |             |
|---|-------------|-------------|-------------|
| C | 1.27874900  | 0.60554500  | 0.30904900  |
| H | 1.08494600  | 1.44915500  | -0.34992500 |
| C | 0.27097900  | -0.51457400 | 0.14683800  |
| H | 0.18601800  | -0.80514500 | -0.90233400 |
| H | 0.60098000  | -1.39334100 | 0.69885800  |
| C | -1.17339100 | -0.19901200 | 0.65401700  |
| C | -2.16276800 | -1.35763800 | 0.46761900  |
| C | -1.66874200 | 1.10554200  | 0.32141500  |
| C | -3.19552300 | -1.05604600 | -0.61478800 |
| H | -2.67326500 | -1.55603000 | 1.41172100  |
| H | -1.59921500 | -2.25709900 | 0.22234600  |
| C | -2.98172900 | 1.39343800  | -0.18752100 |
| H | -0.99171100 | 1.94881500  | 0.45570800  |
| C | -3.95254900 | 0.22761500  | -0.29079700 |
| H | -2.69824200 | -0.95688900 | -1.58598200 |
| H | -3.89017900 | -1.88927500 | -0.70334200 |
| H | -3.37678900 | 2.33477900  | 0.20934200  |
| H | -2.63990700 | 1.71690100  | -1.20830100 |

|    |             |             |             |
|----|-------------|-------------|-------------|
| H  | -4.48381200 | 0.12253100  | 0.65770700  |
| H  | -4.70086300 | 0.45232600  | -1.04893000 |
| H  | -1.01982200 | 0.02790900  | 1.74312700  |
| H  | 1.34099100  | 0.95621300  | 1.33832900  |
| Br | 3.03916300  | -0.03943100 | -0.16495200 |

## 24.Br

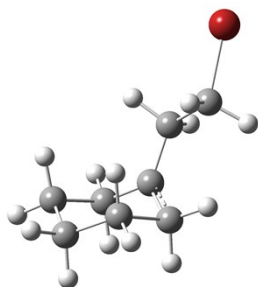

|                                              |              |
|----------------------------------------------|--------------|
| Zero-point correction=                       | 0.205528     |
| (Hartree/Particle)                           |              |
| Thermal correction to Energy=                | 0.215198     |
| Thermal correction to Enthalpy=              | 0.216142     |
| Thermal correction to Gibbs Free Energy=     | 0.168939     |
| Sum of electronic and zero-point Energies=   | -2886.941704 |
| Sum of electronic and thermal Energies=      | -2886.932034 |
| Sum of electronic and thermal Enthalpies=    | -2886.931090 |
| Sum of electronic and thermal Free Energies= | -2886.978294 |

|    |             |             |             |
|----|-------------|-------------|-------------|
| C  | 0.12815200  | -0.31836700 | 0.28173700  |
| H  | 0.90238500  | 0.26143300  | 0.77851900  |
| C  | -0.72033000 | 0.53706000  | -0.64139500 |
| H  | -0.15095300 | 0.89771300  | -1.50825900 |
| H  | -1.51064600 | -0.07592100 | -1.11234700 |
| C  | -1.46032700 | 1.66501500  | -0.06397000 |
| C  | -2.02939500 | 2.66215600  | -0.95810000 |
| C  | -1.47485900 | 1.95526500  | 1.35261600  |
| C  | -0.99058300 | 3.85614500  | -0.87533500 |
| H  | -2.98599600 | 3.03527200  | -0.59183000 |
| H  | -2.10801900 | 2.31723900  | -1.98715500 |
| C  | -0.37870000 | 3.11536900  | 1.43142100  |
| H  | -1.17461200 | 1.12677500  | 1.98718600  |
| C  | -0.79680600 | 4.28945900  | 0.56604700  |
| H  | -0.04507600 | 3.53283000  | -1.31591100 |
| H  | -1.39222800 | 4.65053000  | -1.50234600 |
| H  | -0.30847800 | 3.36792400  | 2.48852100  |
| H  | 0.59178100  | 2.72407500  | 1.11918200  |
| H  | -1.71630200 | 4.73281900  | 0.95487300  |
| H  | -0.02562100 | 5.06103400  | 0.61187400  |
| H  | -2.41684000 | 2.39200400  | 1.68148000  |
| H  | -0.47248100 | -0.83468600 | 1.02551500  |
| Br | 1.02278200  | -1.68071800 | -0.75534900 |

## TS25.Br

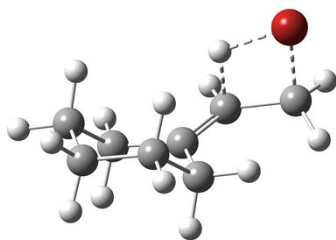

Zero-point correction= 0.200079  
 (Hartree/Particle)  
 Thermal correction to Energy= 0.209364  
 Thermal correction to Enthalpy= 0.210308  
 Thermal correction to Gibbs Free Energy= 0.164361  
 Sum of electronic and zero-point Energies= -2886.897206  
 Sum of electronic and thermal Energies= -2886.887921  
 Sum of electronic and thermal Enthalpies= -2886.886977  
 Sum of electronic and thermal Free Energies= -2886.932924

|    |             |             |             |
|----|-------------|-------------|-------------|
| C  | -1.06267200 | -0.84817300 | 0.31888400  |
| H  | -0.92760700 | -0.81839000 | 1.39383200  |
| C  | -1.64658500 | 0.36426200  | -0.33723500 |
| H  | -0.03750600 | 0.49313400  | -0.87822900 |
| H  | -2.26498500 | 0.17656700  | -1.20849800 |
| C  | -1.48906200 | 1.63647600  | 0.11114800  |
| C  | -2.09011000 | 2.78079500  | -0.64242200 |
| C  | -0.68017700 | 2.01987400  | 1.31048900  |
| C  | -1.01725000 | 3.81787900  | -1.00981300 |
| H  | -2.82189400 | 3.25414200  | 0.02207200  |
| H  | -2.62577800 | 2.42927800  | -1.52365800 |
| C  | 0.38458500  | 3.06767400  | 0.93402500  |
| H  | -0.21987400 | 1.16200700  | 1.80049600  |
| C  | -0.23934400 | 4.26239300  | 0.22260200  |
| H  | -0.33139100 | 3.38053500  | -1.74298300 |
| H  | -1.49754300 | 4.66623500  | -1.49609600 |
| H  | 0.90524300  | 3.37745400  | 1.83956400  |
| H  | 1.13405800  | 2.60449000  | 0.28304800  |
| H  | -0.91057100 | 4.78544300  | 0.91015200  |
| H  | 0.53830700  | 4.97188800  | -0.06039600 |
| H  | -1.37096100 | 2.46929400  | 2.03228400  |
| H  | -1.46003900 | -1.79456700 | -0.02858700 |
| Br | 0.83653400  | -0.77153000 | -0.44036500 |

## 26.Br

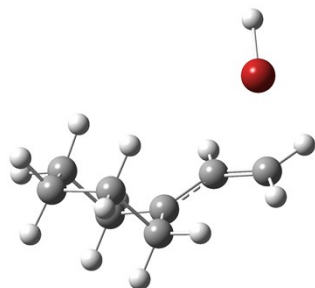



|                                              |  |  |              |
|----------------------------------------------|--|--|--------------|
| Zero-point correction=                       |  |  | 0.200790     |
| (Hartree/Particle)                           |  |  |              |
| Thermal correction to Energy=                |  |  | 0.211919     |
| Thermal correction to Enthalpy=              |  |  | 0.212864     |
| Thermal correction to Gibbs Free Energy=     |  |  | 0.160960     |
| Sum of electronic and zero-point Energies=   |  |  | -2886.934503 |
| Sum of electronic and thermal Energies=      |  |  | -2886.923373 |
| Sum of electronic and thermal Enthalpies=    |  |  | -2886.922429 |
| Sum of electronic and thermal Free Energies= |  |  | -2886.974332 |

|    |             |             |             |
|----|-------------|-------------|-------------|
| C  | -1.34476000 | -0.59087600 | 0.18985900  |
| H  | -0.96572700 | -0.61489900 | 1.20205400  |
| C  | -1.77974700 | 0.54319500  | -0.39922200 |
| H  | 2.10186500  | -0.99982600 | -1.42108300 |
| H  | -2.22422500 | 0.49764300  | -1.38655000 |
| C  | -1.74538400 | 1.80604800  | 0.24392300  |
| C  | -2.35060600 | 2.96293100  | -0.42034200 |
| C  | -0.94478100 | 2.10110900  | 1.43448400  |
| C  | -1.13512000 | 3.78756600  | -0.98493100 |
| H  | -2.86650600 | 3.59838800  | 0.30149400  |
| H  | -3.02514800 | 2.67944400  | -1.22495700 |
| C  | 0.28166700  | 2.92924200  | 0.89731500  |
| H  | -0.58459700 | 1.22288200  | 1.96168400  |
| C  | -0.18706500 | 4.16181000  | 0.14194400  |
| H  | -0.62047100 | 3.19101100  | -1.74155000 |
| H  | -1.55211700 | 4.66186500  | -1.48286400 |
| H  | 0.88882600  | 3.18666900  | 1.76422300  |
| H  | 0.88245600  | 2.28320300  | 0.25314300  |
| H  | -0.68095100 | 4.85446300  | 0.82810400  |
| H  | 0.67860900  | 4.68404600  | -0.26960200 |
| H  | -1.50384200 | 2.74265900  | 2.11763300  |
| H  | -1.41209700 | -1.54357200 | -0.32101700 |
| Br | 1.92049900  | -0.80604000 | -0.02163000 |

## Product 14

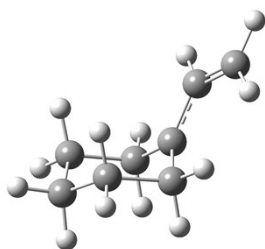

|                                            |  |  |             |
|--------------------------------------------|--|--|-------------|
| Zero-point correction=                     |  |  | 0.192773    |
| (Hartree/Particle)                         |  |  |             |
| Thermal correction to Energy=              |  |  | 0.200687    |
| Thermal correction to Enthalpy=            |  |  | 0.201631    |
| Thermal correction to Gibbs Free Energy=   |  |  | 0.160455    |
| Sum of electronic and zero-point Energies= |  |  | -312.145159 |
| Sum of electronic and thermal Energies=    |  |  | -312.137246 |
| Sum of electronic and thermal Enthalpies=  |  |  | -312.136301 |

Sum of electronic and thermal Free Energies= -312.177477

|   |             |             |             |
|---|-------------|-------------|-------------|
| C | -1.12651400 | -0.61453900 | 0.45182400  |
| H | -0.31293200 | -0.58124800 | 1.16470100  |
| C | -1.80441400 | 0.48318000  | 0.06886600  |
| H | -2.64430800 | 0.38562200  | -0.60916300 |
| C | -1.52566600 | 1.78613600  | 0.57572900  |
| C | -2.39106700 | 2.89648000  | 0.18511100  |
| C | -0.29900500 | 2.14894900  | 1.28459600  |
| C | -1.55619800 | 3.66632300  | -0.91306800 |
| H | -2.54643900 | 3.58831100  | 1.01393000  |
| H | -3.34317000 | 2.56879300  | -0.22537300 |
| C | 0.55745900  | 2.93430000  | 0.21836200  |
| H | 0.27281500  | 1.30526400  | 1.65822000  |
| C | -0.22340700 | 4.11264400  | -0.33777800 |
| H | -1.40972200 | 3.01200900  | -1.77517600 |
| H | -2.17245500 | 4.50422500  | -1.23616600 |
| H | 1.47025100  | 3.24731300  | 0.72329000  |
| H | 0.83940500  | 2.24461900  | -0.58007000 |
| H | -0.38645000 | 4.85593600  | 0.44644400  |
| H | 0.36401700  | 4.59800600  | -1.11962800 |
| H | -0.52183500 | 2.83949900  | 2.09930800  |
| H | -1.39872200 | -1.59135200 | 0.07083100  |

### HBr

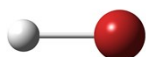

|                                              |              |
|----------------------------------------------|--------------|
| Zero-point correction=                       | 0.006101     |
| (Hartree/Particle)                           |              |
| Thermal correction to Energy=                | 0.008462     |
| Thermal correction to Enthalpy=              | 0.009406     |
| Thermal correction to Gibbs Free Energy=     | -0.013121    |
| Sum of electronic and zero-point Energies=   | -2574.784514 |
| Sum of electronic and thermal Energies=      | -2574.782153 |
| Sum of electronic and thermal Enthalpies=    | -2574.781209 |
| Sum of electronic and thermal Free Energies= | -2574.803736 |

|    |             |            |            |
|----|-------------|------------|------------|
| Br | -5.39404400 | 0.60327200 | 0.00000000 |
| H  | -6.81546200 | 0.60327200 | 0.00000000 |

### TS27.Br

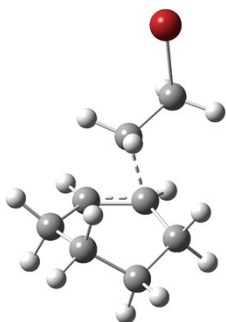

|                                              |              |
|----------------------------------------------|--------------|
| Zero-point correction=                       | 0.206244     |
| (Hartree/Particle)                           |              |
| Thermal correction to Energy=                | 0.215094     |
| Thermal correction to Enthalpy=              | 0.216038     |
| Thermal correction to Gibbs Free Energy=     | 0.171073     |
| Sum of electronic and zero-point Energies=   | -2886.922446 |
| Sum of electronic and thermal Energies=      | -2886.913597 |
| Sum of electronic and thermal Enthalpies=    | -2886.912653 |
| Sum of electronic and thermal Free Energies= | -2886.957617 |

|    |             |             |             |
|----|-------------|-------------|-------------|
| C  | -0.04973500 | 0.03993200  | 0.72536800  |
| H  | 0.63447000  | 0.19520300  | 1.55481500  |
| C  | -0.51558800 | 1.36319300  | 0.13327500  |
| H  | 0.29071000  | 1.98688600  | -0.23549900 |
| H  | -1.17799500 | 1.13824600  | -0.70942600 |
| C  | -2.05848400 | 2.52257300  | 0.48748000  |
| C  | -1.98612300 | 3.74116300  | -0.34809500 |
| C  | -1.12139600 | 2.22568000  | 1.48192900  |
| C  | -0.73622400 | 4.58625800  | -0.11092800 |
| H  | -2.88881500 | 4.29556000  | -0.04534900 |
| H  | -2.15620800 | 3.49366600  | -1.39883700 |
| C  | -0.13821400 | 3.27513800  | 1.97592000  |
| H  | -1.40883600 | 1.45915600  | 2.19398300  |
| C  | -0.41887200 | 4.65712800  | 1.38023000  |
| H  | 0.11047400  | 4.17638400  | -0.66609500 |
| H  | -0.90728400 | 5.58383600  | -0.51202400 |
| H  | -0.21990900 | 3.30873100  | 3.06227700  |
| H  | 0.88212500  | 2.95169300  | 1.75878400  |
| H  | -1.26955800 | 5.10397300  | 1.90196700  |
| H  | 0.43514900  | 5.30794000  | 1.55855400  |
| H  | -2.91665800 | 1.86722600  | 0.36726800  |
| H  | -0.88661100 | -0.57722300 | 1.04059300  |
| Br | 0.90700500  | -0.92418100 | -0.64698700 |

28.Br

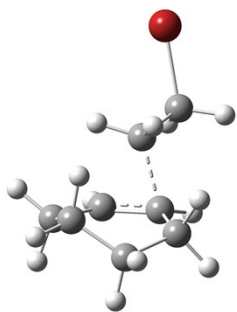

|                                              |              |
|----------------------------------------------|--------------|
| Zero-point correction=                       | 0.206089     |
| (Hartree/Particle)                           |              |
| Thermal correction to Energy=                | 0.215826     |
| Thermal correction to Enthalpy=              | 0.216770     |
| Thermal correction to Gibbs Free Energy=     | 0.169405     |
| Sum of electronic and zero-point Energies=   | -2886.922903 |
| Sum of electronic and thermal Energies=      | -2886.913166 |
| Sum of electronic and thermal Enthalpies=    | -2886.912221 |
| Sum of electronic and thermal Free Energies= | -2886.959587 |

|    |             |             |             |
|----|-------------|-------------|-------------|
| C  | -0.45510700 | -0.82429900 | 0.65232000  |
| H  | 0.12800900  | -0.99553200 | 1.55221400  |
| C  | -0.48629800 | 0.64168000  | 0.27808000  |
| H  | 0.48358100  | 1.12428500  | 0.20107000  |
| H  | -0.93475100 | 0.74822700  | -0.71821500 |
| C  | -2.04435400 | 1.68416500  | 0.60376500  |
| C  | -2.11042000 | 2.91885100  | -0.22160400 |
| C  | -1.11704000 | 1.51470300  | 1.63457700  |
| C  | -0.89156300 | 3.81965300  | -0.04213500 |
| H  | -3.01545000 | 3.42512600  | 0.14469200  |
| H  | -2.31837500 | 2.67203400  | -1.26408200 |
| C  | -0.24606300 | 2.65879200  | 2.11844600  |
| H  | -1.31935000 | 0.72534000  | 2.35052900  |
| C  | -0.58234900 | 3.99122900  | 1.44227100  |
| H  | -0.03220200 | 3.39663600  | -0.57001900 |
| H  | -1.09191800 | 4.78401200  | -0.50556300 |
| H  | -0.39702200 | 2.73331500  | 3.19598000  |
| H  | 0.80549100  | 2.39911100  | 1.98365700  |
| H  | -1.45325000 | 4.43303100  | 1.93309800  |
| H  | 0.24290500  | 4.68628100  | 1.58539500  |
| H  | -2.82189900 | 0.93567600  | 0.47526900  |
| H  | -1.45691900 | -1.22873100 | 0.78011500  |
| Br | 0.38972000  | -1.80914500 | -0.77965600 |

**TS29.Br**

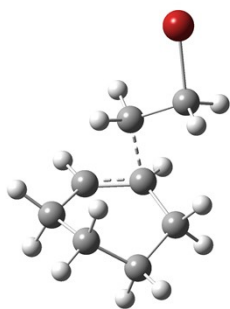

```

Zero-point correction=                0.205937
(Hartree/Particle)
Thermal correction to Energy=         0.214927
Thermal correction to Enthalpy=       0.215871
Thermal correction to Gibbs Free Energy= 0.170543
Sum of electronic and zero-point Energies= -2886.918867
Sum of electronic and thermal Energies= -2886.909877
Sum of electronic and thermal Enthalpies= -2886.908933
Sum of electronic and thermal Free Energies= -2886.954261

```

|    |             |             |             |
|----|-------------|-------------|-------------|
| C  | 0.43274300  | 0.28203100  | 0.92905000  |
| H  | 1.19300200  | 0.88344100  | 1.41276800  |
| C  | -0.65031800 | 1.13652900  | 0.26808200  |
| H  | -0.17018000 | 1.90604600  | -0.33550300 |
| H  | -1.28229800 | 0.51470100  | -0.35785800 |
| C  | -2.10230200 | 2.56667900  | 0.55981000  |
| C  | -1.63888800 | 3.94749100  | 0.38195100  |
| C  | -1.61714900 | 1.71173300  | 1.55930600  |
| C  | -0.50321000 | 4.33531000  | 1.31940600  |
| H  | -2.54686300 | 4.53881300  | 0.59819200  |
| H  | -1.44213700 | 4.14567700  | -0.67587100 |
| C  | -0.88770100 | 2.30043600  | 2.76245600  |
| H  | -2.22060100 | 0.83092300  | 1.76073200  |
| C  | -0.80797200 | 3.82828900  | 2.72491100  |
| H  | 0.43723300  | 3.90768400  | 0.95742000  |
| H  | -0.37895000 | 5.41648400  | 1.30863000  |
| H  | -1.43385700 | 1.97469300  | 3.64825800  |
| H  | 0.10775400  | 1.87040300  | 2.85687100  |
| H  | -1.75995600 | 4.25252400  | 3.05541500  |
| H  | -0.05254900 | 4.16832600  | 3.43068300  |
| H  | -2.84592600 | 2.18553900  | -0.13582200 |
| H  | 0.01665300  | -0.44109000 | 1.62427100  |
| Br | 1.31384100  | -0.69757200 | -0.48300500 |

**30.Br**

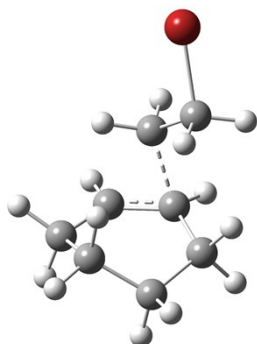

|                                              |              |
|----------------------------------------------|--------------|
| Zero-point correction=                       | 0.206569     |
| (Hartree/Particle)                           |              |
| Thermal correction to Energy=                | 0.216205     |
| Thermal correction to Enthalpy=              | 0.217149     |
| Thermal correction to Gibbs Free Energy=     | 0.170271     |
| Sum of electronic and zero-point Energies=   | -2886.918835 |
| Sum of electronic and thermal Energies=      | -2886.909199 |
| Sum of electronic and thermal Enthalpies=    | -2886.908255 |
| Sum of electronic and thermal Free Energies= | -2886.955133 |

|    |             |             |             |
|----|-------------|-------------|-------------|
| C  | -0.91493400 | 0.37955200  | 0.28318100  |
| H  | -0.92073800 | -0.51420600 | 0.89734200  |
| C  | 0.43806600  | 0.61231500  | -0.37856100 |
| H  | 1.23328900  | 0.72325100  | 0.35230600  |
| H  | 0.42819900  | 1.45588900  | -1.06002000 |
| C  | -2.41679500 | 1.42752000  | 0.99906600  |
| C  | -3.11768000 | 2.26644600  | 0.00275300  |
| C  | -1.11385900 | 1.68427500  | 1.43082300  |
| C  | -2.18857400 | 3.24370500  | -0.70653000 |
| H  | -3.86366700 | 2.81005200  | 0.60400700  |
| H  | -3.70166500 | 1.64232700  | -0.67658700 |
| C  | -0.44488100 | 3.01176300  | 1.12625900  |
| H  | -0.79044200 | 1.19080600  | 2.34093300  |
| C  | -1.32338600 | 3.97260000  | 0.31679100  |
| H  | -1.56745700 | 2.70207400  | -1.42678300 |
| H  | -2.78182300 | 3.95124900  | -1.28287400 |
| H  | -0.20675300 | 3.45165300  | 2.09611700  |
| H  | 0.51810600  | 2.85207000  | 0.64338400  |
| H  | -1.97971000 | 4.51961800  | 0.99790300  |
| H  | -0.69431900 | 4.71497100  | -0.17084200 |
| H  | -2.96356600 | 0.60511900  | 1.45291700  |
| H  | -1.65607100 | 0.25954300  | -0.51157100 |
| Br | 0.83080800  | -0.96568700 | -1.42363300 |

**TS31.Br**

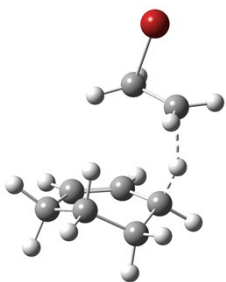

|                                              |              |
|----------------------------------------------|--------------|
| Zero-point correction=                       | 0.201588     |
| (Hartree/Particle)                           |              |
| Thermal correction to Energy=                | 0.211515     |
| Thermal correction to Enthalpy=              | 0.212459     |
| Thermal correction to Gibbs Free Energy=     | 0.164350     |
| Sum of electronic and zero-point Energies=   | -2886.880486 |
| Sum of electronic and thermal Energies=      | -2886.870559 |
| Sum of electronic and thermal Enthalpies=    | -2886.869615 |
| Sum of electronic and thermal Free Energies= | -2886.917725 |

|    |             |             |             |
|----|-------------|-------------|-------------|
| C  | -0.29888100 | -0.02873200 | -0.26996400 |
| H  | -0.26187400 | -0.59447100 | 0.65200300  |
| C  | 0.69449500  | 1.00962600  | -0.47231500 |
| H  | 1.63170000  | 0.97823300  | 0.07018400  |
| H  | 0.58707700  | 1.71377800  | -1.28847000 |
| C  | -2.77775900 | 1.69384600  | 1.34609000  |
| C  | -3.33825800 | 2.45106900  | 0.18041000  |
| C  | -1.52834300 | 1.83580200  | 1.79395900  |
| C  | -2.25491900 | 3.13184500  | -0.65256800 |
| H  | -4.04014200 | 3.19734800  | 0.56876000  |
| H  | -3.94276700 | 1.78279800  | -0.43706400 |
| C  | -0.57415400 | 2.79959100  | 1.18353600  |
| H  | -1.19871100 | 1.27761000  | 2.66335200  |
| C  | -1.21987200 | 3.80398600  | 0.24368300  |
| H  | -1.76262400 | 2.38902000  | -1.29204800 |
| H  | -2.70060700 | 3.85964000  | -1.32945300 |
| H  | 0.06188000  | 3.27365500  | 1.93364500  |
| H  | 0.20393800  | 2.20339300  | 0.58570500  |
| H  | -1.71214000 | 4.56190100  | 0.86014700  |
| H  | -0.46190400 | 4.32533000  | -0.34254100 |
| H  | -3.45164400 | 1.02704700  | 1.87383600  |
| H  | -1.28635200 | 0.12609100  | -0.68444800 |
| Br | 0.82881000  | -0.93910000 | -1.62445800 |

**32.Br**

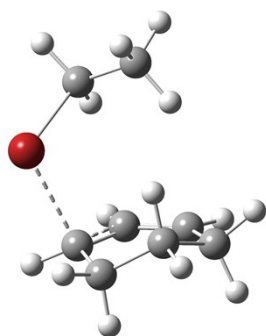

|                                              |              |
|----------------------------------------------|--------------|
| Zero-point correction=                       | 0.203758     |
| (Hartree/Particle)                           |              |
| Thermal correction to Energy=                | 0.214439     |
| Thermal correction to Enthalpy=              | 0.215383     |
| Thermal correction to Gibbs Free Energy=     | 0.166408     |
| Sum of electronic and zero-point Energies=   | -2886.934123 |
| Sum of electronic and thermal Energies=      | -2886.923442 |
| Sum of electronic and thermal Enthalpies=    | -2886.922498 |
| Sum of electronic and thermal Free Energies= | -2886.971473 |

|    |             |             |             |
|----|-------------|-------------|-------------|
| C  | 0.21341500  | -0.10536400 | 0.22353900  |
| H  | 0.55806600  | -1.12895200 | 0.10487500  |
| C  | 0.99572500  | 0.90294800  | -0.57265300 |
| H  | 0.98356200  | 0.67369500  | -1.63664900 |
| H  | 0.62094800  | 1.91336300  | -0.41623400 |
| C  | -2.73181800 | 1.44654100  | 0.79000900  |
| C  | -3.21651500 | 2.38069300  | -0.27003800 |
| C  | -1.76197800 | 1.93187900  | 1.74145600  |
| C  | -2.11048200 | 3.29778800  | -0.76918900 |
| H  | -4.00253500 | 2.96502900  | 0.23163300  |
| H  | -3.71133300 | 1.84279800  | -1.07765600 |
| C  | -1.20667100 | 3.14556300  | 1.57546000  |
| H  | -1.57574200 | 1.35135000  | 2.63579800  |
| C  | -1.44291400 | 4.02368700  | 0.39546100  |
| H  | -1.37192400 | 2.69877900  | -1.30801100 |
| H  | -2.51253700 | 4.01524200  | -1.48200000 |
| H  | -0.58405800 | 3.54248600  | 2.37131500  |
| H  | 2.03155700  | 0.86889700  | -0.22822900 |
| H  | -2.06092500 | 4.86250100  | 0.74205900  |
| H  | -0.49752000 | 4.47907700  | 0.09106200  |
| H  | -3.45907500 | 0.73861900  | 1.17379300  |
| H  | 0.12283500  | 0.13717800  | 1.27901900  |
| Br | -1.66483000 | -0.22909100 | -0.39773900 |

**Product 15** (2-cyclohexenium ion)

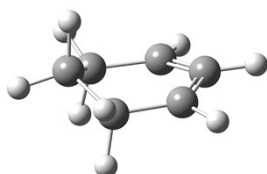



|                                              |  |  |             |
|----------------------------------------------|--|--|-------------|
| Zero-point correction=                       |  |  | 0.134172    |
| (Hartree/Particle)                           |  |  |             |
| Thermal correction to Energy=                |  |  | 0.139725    |
| Thermal correction to Enthalpy=              |  |  | 0.140669    |
| Thermal correction to Gibbs Free Energy=     |  |  | 0.105564    |
| Sum of electronic and zero-point Energies=   |  |  | -233.581498 |
| Sum of electronic and thermal Energies=      |  |  | -233.575944 |
| Sum of electronic and thermal Enthalpies=    |  |  | -233.575000 |
| Sum of electronic and thermal Free Energies= |  |  | -233.610106 |

|   |             |             |             |
|---|-------------|-------------|-------------|
| C | -3.83135900 | -0.88153900 | -0.09932200 |
| C | -2.31356500 | -0.99284400 | -0.04875400 |
| C | -1.66199800 | 0.23029100  | 0.43477900  |
| C | -2.31434200 | 1.21337600  | 1.15213100  |
| C | -3.59767300 | 0.94424800  | 1.58539400  |
| C | -4.36638700 | -0.23536100 | 1.17129800  |
| H | -0.59205500 | 0.33285300  | 0.27059100  |
| H | -1.97570600 | -1.78507000 | 0.64534000  |
| H | -1.87750800 | -1.28169100 | -1.00863600 |
| H | -4.11078200 | -0.26180800 | -0.95388600 |
| H | -4.28170400 | -1.85998000 | -0.24940100 |
| H | -1.78742500 | 2.09344300  | 1.49308600  |
| H | -4.04432000 | 1.60622500  | 2.32330300  |
| H | -4.32120000 | -0.91981600 | 2.03915400  |
| H | -5.42516500 | 0.02729500  | 1.09994800  |

## 2-Bromoethane

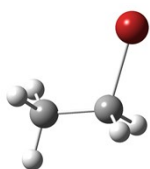

|                                              |  |  |              |
|----------------------------------------------|--|--|--------------|
| Zero-point correction=                       |  |  | 0.066532     |
| (Hartree/Particle)                           |  |  |              |
| Thermal correction to Energy=                |  |  | 0.070645     |
| Thermal correction to Enthalpy=              |  |  | 0.071590     |
| Thermal correction to Gibbs Free Energy=     |  |  | 0.039168     |
| Sum of electronic and zero-point Energies=   |  |  | -2653.337027 |
| Sum of electronic and thermal Energies=      |  |  | -2653.332914 |
| Sum of electronic and thermal Enthalpies=    |  |  | -2653.331970 |
| Sum of electronic and thermal Free Energies= |  |  | -2653.364391 |

|    |             |             |             |
|----|-------------|-------------|-------------|
| C  | -1.70396000 | 0.34096100  | 0.00018000  |
| H  | -1.34392400 | -0.69019500 | -0.00472600 |
| H  | -1.34909500 | 0.83518900  | -0.90298100 |
| H  | -2.79267800 | 0.32708200  | -0.02012500 |
| C  | -1.19508500 | 1.04402500  | 1.23681700  |
| H  | -1.55883600 | 0.58782700  | 2.15247000  |
| H  | -0.11104300 | 1.09746200  | 1.26689300  |
| Br | -1.80900100 | 2.89816000  | 1.30032400  |

Figure 4

Iodiranium Ion 6.I

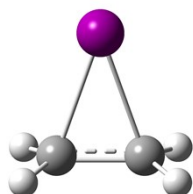

|                                              |  |  |             |
|----------------------------------------------|--|--|-------------|
| Zero-point correction=                       |  |  | 0.054543    |
| (Hartree/Particle)                           |  |  |             |
| Thermal correction to Energy=                |  |  | 0.058191    |
| Thermal correction to Enthalpy=              |  |  | 0.059135    |
| Thermal correction to Gibbs Free Energy=     |  |  | 0.027089    |
| Sum of electronic and zero-point Energies=   |  |  | -375.855440 |
| Sum of electronic and thermal Energies=      |  |  | -375.851793 |
| Sum of electronic and thermal Enthalpies=    |  |  | -375.850848 |
| Sum of electronic and thermal Free Energies= |  |  | -375.882894 |

|   |             |             |             |
|---|-------------|-------------|-------------|
| C | 0.91381700  | -0.71656200 | -0.00021700 |
| H | 1.07328100  | -1.25344900 | -0.92740800 |
| H | 1.07325900  | -1.25402700 | 0.92664300  |
| C | 0.91253100  | 0.71784100  | 0.00023300  |
| H | 1.07102000  | 1.25558700  | -0.92662800 |
| H | 1.07101000  | 1.25500900  | 0.92743100  |
| I | -1.18274600 | -0.00126800 | -0.00001100 |

21.I

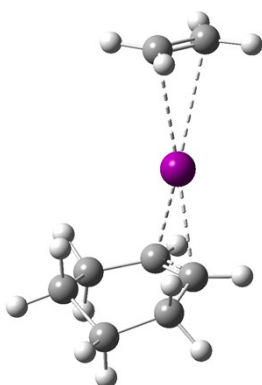

|                                              |  |  |             |
|----------------------------------------------|--|--|-------------|
| Zero-point correction=                       |  |  | 0.201987    |
| (Hartree/Particle)                           |  |  |             |
| Thermal correction to Energy=                |  |  | 0.213544    |
| Thermal correction to Enthalpy=              |  |  | 0.214488    |
| Thermal correction to Gibbs Free Energy=     |  |  | 0.161760    |
| Sum of electronic and zero-point Energies=   |  |  | -610.358044 |
| Sum of electronic and thermal Energies=      |  |  | -610.346487 |
| Sum of electronic and thermal Enthalpies=    |  |  | -610.345542 |
| Sum of electronic and thermal Free Energies= |  |  | -610.398270 |

|   |             |             |             |
|---|-------------|-------------|-------------|
| C | 2.05624400  | -0.75145200 | 0.46778200  |
| H | 1.96221300  | -1.11896500 | 1.48426100  |
| C | 2.04339400  | 0.64332400  | 0.27651800  |
| H | 1.96472200  | 1.27604200  | 1.15502000  |
| C | -3.00837700 | -0.23242400 | -0.78338100 |
| C | -3.13828300 | 0.01946900  | 0.52330800  |
| H | -3.23319700 | -0.78126400 | 1.24707100  |
| H | -2.99449100 | -1.24646800 | -1.16492100 |
| C | 2.55914700  | -1.70410400 | -0.58360700 |
| H | 3.22799700  | -2.40126500 | -0.07319400 |
| H | 1.73430800  | -2.31491900 | -0.95548800 |
| C | 2.49307800  | 1.26863000  | -1.00505600 |
| H | 1.88411100  | 2.14450800  | -1.23045800 |
| H | 3.49916200  | 1.65371200  | -0.78936900 |
| C | 2.55126700  | 0.27615900  | -2.16081700 |
| H | 1.53901900  | 0.03412500  | -2.49674600 |
| H | 3.05890700  | 0.74020900  | -3.00490700 |
| C | 3.28216300  | -0.99178800 | -1.73002800 |
| H | 3.38915400  | -1.68030700 | -2.56644900 |
| H | 4.29277000  | -0.72733800 | -1.40853800 |
| H | -2.97128200 | 0.56828500  | -1.51241000 |
| H | -3.21006600 | 1.03309500  | 0.89936600  |
| I | -0.22128400 | -0.08863100 | 0.15428500  |

## Product 12.I

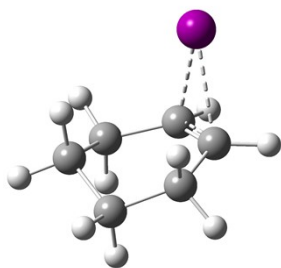

|                                              |             |
|----------------------------------------------|-------------|
| Zero-point correction=                       | 0.149028    |
| (Hartree/Particle)                           |             |
| Thermal correction to Energy=                | 0.155967    |
| Thermal correction to Enthalpy=              | 0.156912    |
| Thermal correction to Gibbs Free Energy=     | 0.116339    |
| Sum of electronic and zero-point Energies=   | -531.823252 |
| Sum of electronic and thermal Energies=      | -531.816313 |
| Sum of electronic and thermal Enthalpies=    | -531.815369 |
| Sum of electronic and thermal Free Energies= | -531.855942 |

|   |             |             |             |
|---|-------------|-------------|-------------|
| C | -4.98093400 | -1.60539400 | -0.00869200 |
| C | -3.45772300 | -1.63272500 | 0.02234600  |
| C | -2.84828400 | -0.27687300 | 0.17014800  |
| C | -3.61857800 | 0.83701800  | 0.66260200  |
| C | -5.05671000 | 0.68507500  | 1.08767700  |
| C | -5.51429100 | -0.77619900 | 1.15549600  |

|   |             |             |             |
|---|-------------|-------------|-------------|
| H | -1.76755900 | -0.20614900 | 0.24483700  |
| H | -3.11166400 | -2.17534000 | 0.91417700  |
| H | -3.01881100 | -2.15320300 | -0.82883400 |
| H | -5.33221600 | -1.20183000 | -0.96240400 |
| H | -5.35320100 | -2.62656900 | 0.05324300  |
| H | -3.06059600 | 1.68082000  | 1.05502400  |
| H | -5.13015900 | 1.16297800  | 2.06784900  |
| H | -5.70042400 | 1.27309000  | 0.43238600  |
| H | -5.16706500 | -1.21808700 | 2.09269500  |
| H | -6.60208200 | -0.80199800 | 1.18206800  |
| I | -3.28008100 | 1.11952300  | -1.57593700 |

## 22.I

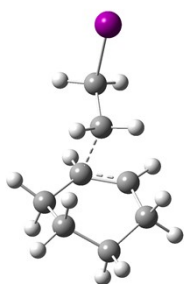

|                                              |             |
|----------------------------------------------|-------------|
| Zero-point correction=                       | 0.205389    |
| (Hartree/Particle)                           |             |
| Thermal correction to Energy=                | 0.215376    |
| Thermal correction to Enthalpy=              | 0.216321    |
| Thermal correction to Gibbs Free Energy=     | 0.167429    |
| Sum of electronic and zero-point Energies=   | -610.362125 |
| Sum of electronic and thermal Energies=      | -610.352137 |
| Sum of electronic and thermal Enthalpies=    | -610.351193 |
| Sum of electronic and thermal Free Energies= | -610.400084 |

|   |             |             |             |
|---|-------------|-------------|-------------|
| C | -1.14630000 | -0.64056000 | 0.30028400  |
| H | -0.86943700 | -0.87746700 | 1.32465500  |
| C | -0.65673800 | 0.72392000  | -0.11929400 |
| H | 0.43495000  | 0.75957900  | -0.07484300 |
| H | -0.91533900 | 1.02939100  | -1.13118300 |
| C | -1.64010800 | 1.90929500  | 0.72215200  |
| C | -2.27988100 | 2.90054100  | -0.21569100 |
| C | -0.34636700 | 2.09756700  | 1.20156900  |
| C | -1.25252600 | 3.76460400  | -0.94234100 |
| H | -2.92809100 | 3.52805500  | 0.40350700  |
| H | -2.93763800 | 2.37446600  | -0.90946200 |
| C | 0.53220500  | 3.22362900  | 0.75867700  |
| H | -0.00557400 | 1.47057700  | 2.02069800  |
| C | -0.24125100 | 4.33539600  | 0.04622400  |
| H | -0.73458600 | 3.18231600  | -1.71085800 |
| H | -1.76820900 | 4.56792000  | -1.46596500 |
| H | 1.02906300  | 3.59250700  | 1.66008800  |
| H | 1.34052200  | 2.83339900  | 0.13250900  |
| H | -0.76614200 | 4.93962600  | 0.78983900  |

|   |             |             |             |
|---|-------------|-------------|-------------|
| H | 0.46383300  | 4.99541900  | -0.45574400 |
| H | -2.30643200 | 1.28793600  | 1.31070100  |
| H | -2.21854800 | -0.74785500 | 0.17158700  |
| I | -0.22695900 | -2.10627900 | -0.94849800 |

### TS23.I

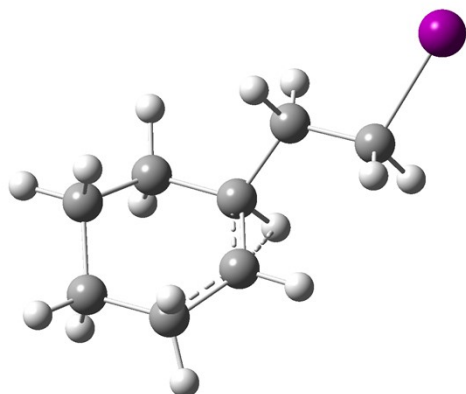

|                                              |             |
|----------------------------------------------|-------------|
| Zero-point correction=                       | 0.202737    |
| (Hartree/Particle)                           |             |
| Thermal correction to Energy=                | 0.212107    |
| Thermal correction to Enthalpy=              | 0.213052    |
| Thermal correction to Gibbs Free Energy=     | 0.165989    |
| Sum of electronic and zero-point Energies=   | -610.356154 |
| Sum of electronic and thermal Energies=      | -610.346784 |
| Sum of electronic and thermal Enthalpies=    | -610.345840 |
| Sum of electronic and thermal Free Energies= | -610.392902 |

|   |             |             |             |
|---|-------------|-------------|-------------|
| C | 0.70729000  | 0.64403400  | 0.37053400  |
| H | 0.52222400  | 1.48585700  | -0.29238600 |
| C | -0.28492500 | -0.48550000 | 0.19016500  |
| H | -0.34699000 | -0.78477400 | -0.85824600 |
| H | 0.03135900  | -1.36113500 | 0.75511000  |
| C | -1.74899400 | -0.18152200 | 0.66056800  |
| C | -2.71865800 | -1.35564700 | 0.47144000  |
| C | -2.25133200 | 1.11114200  | 0.30357700  |
| C | -3.74767400 | -1.07499000 | -0.62015400 |
| H | -3.23293400 | -1.55881100 | 1.41249900  |
| H | -2.13919100 | -2.24714800 | 0.23393000  |
| C | -3.56452100 | 1.38123900  | -0.21940900 |
| H | -1.58140600 | 1.96100200  | 0.43144700  |
| C | -4.52134500 | 0.20262000  | -0.31199300 |
| H | -3.24482300 | -0.97780400 | -1.58867300 |
| H | -4.43176000 | -1.91717900 | -0.70638900 |
| H | -3.97206500 | 2.31722300  | 0.17841600  |
| H | -3.23316500 | 1.70721800  | -1.24065800 |
| H | -5.05366600 | 0.10031000  | 0.63622200  |
| H | -5.27042800 | 0.40949600  | -1.07438600 |
| H | -1.61630200 | 0.06399800  | 1.74897100  |
| H | 0.75349400  | 0.99438600  | 1.40016500  |
| I | 2.67163400  | -0.03096000 | -0.11517700 |

## 24.I

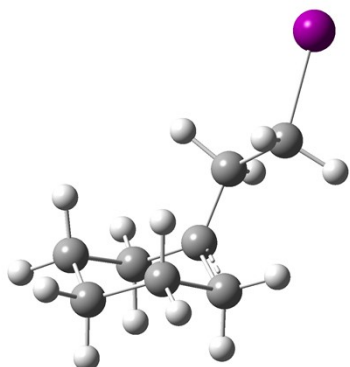

|                                              |             |
|----------------------------------------------|-------------|
| Zero-point correction=                       | 0.204984    |
| (Hartree/Particle)                           |             |
| Thermal correction to Energy=                | 0.214766    |
| Thermal correction to Enthalpy=              | 0.215711    |
| Thermal correction to Gibbs Free Energy=     | 0.167664    |
| Sum of electronic and zero-point Energies=   | -610.379666 |
| Sum of electronic and thermal Energies=      | -610.369883 |
| Sum of electronic and thermal Enthalpies=    | -610.368939 |
| Sum of electronic and thermal Free Energies= | -610.416985 |

|   |             |             |             |
|---|-------------|-------------|-------------|
| C | 0.13048800  | -0.31046800 | 0.27862600  |
| H | 0.89887900  | 0.27741400  | 0.77388500  |
| C | -0.72981400 | 0.53509900  | -0.64158500 |
| H | -0.17742900 | 0.89408200  | -1.51988100 |
| H | -1.52848400 | -0.07844400 | -1.09827600 |
| C | -1.46692500 | 1.66643900  | -0.06382300 |
| C | -2.03154900 | 2.66639100  | -0.95810500 |
| C | -1.48138500 | 1.95660000  | 1.35270200  |
| C | -0.98666900 | 3.85440800  | -0.87498000 |
| H | -2.98656100 | 3.04406600  | -0.59243500 |
| H | -2.11139100 | 2.32157600  | -1.98716700 |
| C | -0.38096500 | 3.11164900  | 1.43298900  |
| H | -1.18405100 | 1.12589600  | 1.98574600  |
| C | -0.79201100 | 4.28759000  | 0.56648100  |
| H | -0.04225200 | 3.52565200  | -1.31395000 |
| H | -1.38263800 | 4.65096100  | -1.50286800 |
| H | -0.31076600 | 3.36477700  | 2.48994100  |
| H | 0.58813800  | 2.71589600  | 1.12223000  |
| H | -1.70975600 | 4.73576100  | 0.95395100  |
| H | -0.01704400 | 5.05529900  | 0.61272500  |
| H | -2.42214800 | 2.39655300  | 1.68078500  |
| H | -0.46042900 | -0.83651300 | 1.02273100  |
| I | 1.14949500  | -1.80886600 | -0.84303900 |

## TS25.I

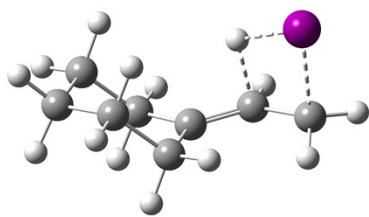

|                                              |             |
|----------------------------------------------|-------------|
| Zero-point correction=                       | 0.199437    |
| (Hartree/Particle)                           |             |
| Thermal correction to Energy=                | 0.208848    |
| Thermal correction to Enthalpy=              | 0.209792    |
| Thermal correction to Gibbs Free Energy=     | 0.162989    |
| Sum of electronic and zero-point Energies=   | -610.336450 |
| Sum of electronic and thermal Energies=      | -610.327038 |
| Sum of electronic and thermal Enthalpies=    | -610.326094 |
| Sum of electronic and thermal Free Energies= | -610.372897 |

|   |             |             |             |
|---|-------------|-------------|-------------|
| C | -1.09237200 | -0.85747300 | 0.34185500  |
| H | -0.95421500 | -0.80810800 | 1.41562900  |
| C | -1.64282400 | 0.36318300  | -0.33003500 |
| H | -0.01837900 | 0.53392300  | -0.94613200 |
| H | -2.25602800 | 0.17669600  | -1.20584900 |
| C | -1.48514300 | 1.63658300  | 0.11066000  |
| C | -2.08635000 | 2.77994500  | -0.64619600 |
| C | -0.67642800 | 2.02138600  | 1.31022700  |
| C | -1.01888400 | 3.82347100  | -1.00753200 |
| H | -2.82557300 | 3.24966900  | 0.01271800  |
| H | -2.61530000 | 2.42588300  | -1.53067100 |
| C | 0.38133600  | 3.07679100  | 0.93802000  |
| H | -0.20924800 | 1.16299800  | 1.79327700  |
| C | -0.24875600 | 4.26990900  | 0.22921600  |
| H | -0.32649500 | 3.39150300  | -1.73794200 |
| H | -1.50075900 | 4.67068300  | -1.49445400 |
| H | 0.90054400  | 3.38778400  | 1.84411500  |
| H | 1.13342800  | 2.62070600  | 0.28501000  |
| H | -0.92695100 | 4.78472000  | 0.91627300  |
| H | 0.52429100  | 4.98683100  | -0.04780000 |
| H | -1.36648600 | 2.46102100  | 2.03884200  |
| H | -1.54246200 | -1.79084600 | 0.02465400  |
| I | 0.95843100  | -0.88009800 | -0.50357200 |

26.I

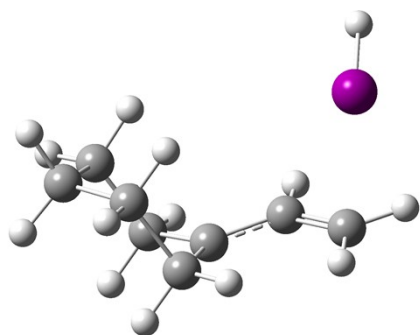

|                                              |             |
|----------------------------------------------|-------------|
| Zero-point correction=                       | 0.199409    |
| (Hartree/Particle)                           |             |
| Thermal correction to Energy=                | 0.210958    |
| Thermal correction to Enthalpy=              | 0.211902    |
| Thermal correction to Gibbs Free Energy=     | 0.158214    |
| Sum of electronic and zero-point Energies=   | -610.369761 |
| Sum of electronic and thermal Energies=      | -610.358213 |
| Sum of electronic and thermal Enthalpies=    | -610.357268 |
| Sum of electronic and thermal Free Energies= | -610.410957 |

|   |             |             |             |
|---|-------------|-------------|-------------|
| C | -1.28179600 | -0.60040600 | 0.23010300  |
| H | -0.91678300 | -0.60877400 | 1.24743500  |
| C | -1.72700200 | 0.52388000  | -0.37642700 |
| H | 1.84406700  | -0.88992100 | -1.75946500 |
| H | -2.16348400 | 0.45920400  | -1.36625400 |
| C | -1.71498700 | 1.79110700  | 0.25077700  |
| C | -2.33093900 | 2.93504100  | -0.42986900 |
| C | -0.93270600 | 2.10991400  | 1.44947800  |
| C | -1.13083100 | 3.79044300  | -0.97402600 |
| H | -2.87717500 | 3.55637800  | 0.28242100  |
| H | -2.98582500 | 2.63339800  | -1.24415900 |
| C | 0.27943800  | 2.96472800  | 0.92837400  |
| H | -0.56066700 | 1.24133400  | 1.98436900  |
| C | -0.20738100 | 4.18639200  | 0.16611800  |
| H | -0.59020600 | 3.20866600  | -1.72415500 |
| H | -1.56002900 | 4.65611000  | -1.47668300 |
| H | 0.87130300  | 3.23728600  | 1.80122800  |
| H | 0.90326300  | 2.33296200  | 0.29147700  |
| H | -0.72761000 | 4.86613200  | 0.84581900  |
| H | 0.65102900  | 4.72997700  | -0.23252700 |
| H | -1.51671400 | 2.73848200  | 2.12416400  |
| H | -1.34260000 | -1.56084000 | -0.26658400 |
| I | 2.04451000  | -0.95013200 | -0.16440000 |

## HI

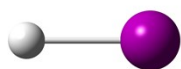

|                               |          |
|-------------------------------|----------|
| Zero-point correction=        | 0.005379 |
| (Hartree/Particle)            |          |
| Thermal correction to Energy= | 0.007739 |



|                                              |  |  |             |
|----------------------------------------------|--|--|-------------|
| Thermal correction to Enthalpy=              |  |  | 0.008684    |
| Thermal correction to Gibbs Free Energy=     |  |  | -0.014745   |
| Sum of electronic and zero-point Energies=   |  |  | -298.218594 |
| Sum of electronic and thermal Energies=      |  |  | -298.216233 |
| Sum of electronic and thermal Enthalpies=    |  |  | -298.215289 |
| Sum of electronic and thermal Free Energies= |  |  | -298.238717 |

|   |             |            |            |
|---|-------------|------------|------------|
| I | -5.39656500 | 0.60327200 | 0.00000000 |
| H | -7.00294100 | 0.60327200 | 0.00000000 |

### TS27.I

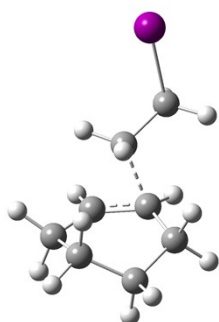

|                                              |  |  |             |
|----------------------------------------------|--|--|-------------|
| Zero-point correction=                       |  |  | 0.205690    |
| (Hartree/Particle)                           |  |  |             |
| Thermal correction to Energy=                |  |  | 0.214679    |
| Thermal correction to Enthalpy=              |  |  | 0.215623    |
| Thermal correction to Gibbs Free Energy=     |  |  | 0.169781    |
| Sum of electronic and zero-point Energies=   |  |  | -610.360851 |
| Sum of electronic and thermal Energies=      |  |  | -610.351862 |
| Sum of electronic and thermal Enthalpies=    |  |  | -610.350917 |
| Sum of electronic and thermal Free Energies= |  |  | -610.396760 |

|   |             |            |             |
|---|-------------|------------|-------------|
| C | -0.06125700 | 0.03331900 | 0.71325500  |
| H | 0.60836300  | 0.17049200 | 1.55697800  |
| C | -0.50699300 | 1.36018600 | 0.12573700  |
| H | 0.30204300  | 1.99193500 | -0.22258600 |
| H | -1.16465600 | 1.15847100 | -0.72521100 |
| C | -2.05350900 | 2.51870300 | 0.49621700  |
| C | -1.98878200 | 3.73650600 | -0.34348900 |
| C | -1.11803200 | 2.23226600 | 1.49121000  |
| C | -0.74002800 | 4.58538900 | -0.11218500 |
| H | -2.89156200 | 4.29089100 | -0.04295800 |
| H | -2.15715800 | 3.48434300 | -1.39336600 |
| C | -0.13546000 | 3.28333600 | 1.97847900  |
| H | -1.39349700 | 1.45961600 | 2.20051600  |
| C | -0.41887600 | 4.66256100 | 1.37789000  |
| H | 0.10631400  | 4.17578900 | -0.66826500 |
| H | -0.91394300 | 5.58131700 | -0.51621500 |
| H | -0.21601300 | 3.32068300 | 3.06493000  |
| H | 0.88507700  | 2.95957500 | 1.76243600  |
| H | -1.26929100 | 5.10983100 | 1.89968500  |

|   |             |             |             |
|---|-------------|-------------|-------------|
| H | 0.43435400  | 5.31560600  | 1.55183400  |
| H | -2.90776600 | 1.85803600  | 0.37792900  |
| H | -0.90509400 | -0.58697400 | 1.00119400  |
| I | 1.02236100  | -1.03532600 | -0.78085500 |

## 28.I

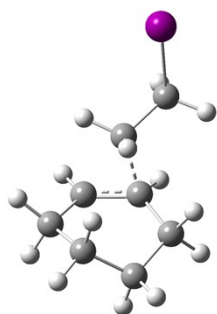

|                                              |  |  |             |
|----------------------------------------------|--|--|-------------|
| Zero-point correction=                       |  |  | 0.205791    |
| (Hartree/Particle)                           |  |  |             |
| Thermal correction to Energy=                |  |  | 0.215677    |
| Thermal correction to Enthalpy=              |  |  | 0.216621    |
| Thermal correction to Gibbs Free Energy=     |  |  | 0.167509    |
| Sum of electronic and zero-point Energies=   |  |  | -610.360762 |
| Sum of electronic and thermal Energies=      |  |  | -610.350877 |
| Sum of electronic and thermal Enthalpies=    |  |  | -610.349933 |
| Sum of electronic and thermal Free Energies= |  |  | -610.399045 |

|   |             |             |             |
|---|-------------|-------------|-------------|
| C | -0.22120500 | -0.71705800 | 0.79550100  |
| H | 0.45212200  | -0.56102400 | 1.63303300  |
| C | -0.68628100 | 0.59738600  | 0.19220300  |
| H | 0.11634900  | 1.22601000  | -0.17590500 |
| H | -1.35849100 | 0.37749600  | -0.64193600 |
| C | -2.20898200 | 1.80542000  | 0.55971400  |
| C | -2.09286300 | 3.02514300  | -0.26933000 |
| C | -1.28998900 | 1.47320100  | 1.55579800  |
| C | -0.82578800 | 3.83808400  | -0.01013700 |
| H | -2.98635000 | 3.60194600  | 0.01738900  |
| H | -2.24993300 | 2.78411500  | -1.32386500 |
| C | -0.27723100 | 2.48623300  | 2.06298400  |
| H | -1.59931100 | 0.70367300  | 2.25464100  |
| C | -0.51874900 | 3.88259000  | 1.48410900  |
| H | 0.01646300  | 3.41610200  | -0.56287400 |
| H | -0.96979800 | 4.84445800  | -0.39976200 |
| H | -0.35838500 | 2.50856400  | 3.14973600  |
| H | 0.73392000  | 2.13691500  | 1.84214600  |
| H | -1.36224300 | 4.34315800  | 2.00561300  |
| H | 0.34971500  | 4.50968200  | 1.67716500  |
| H | -3.08356200 | 1.17519000  | 0.42535600  |
| H | -1.05556000 | -1.34383000 | 1.09604000  |
| I | 0.86594900  | -1.79069100 | -0.69253400 |

## TS29.I

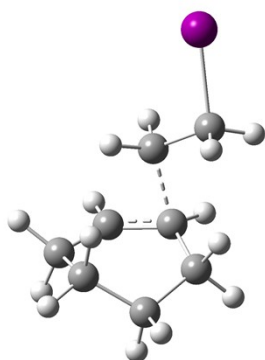

|                                              |             |
|----------------------------------------------|-------------|
| Zero-point correction=                       | 0.205407    |
| (Hartree/Particle)                           |             |
| Thermal correction to Energy=                | 0.214530    |
| Thermal correction to Enthalpy=              | 0.215474    |
| Thermal correction to Gibbs Free Energy=     | 0.169327    |
| Sum of electronic and zero-point Energies=   | -610.357501 |
| Sum of electronic and thermal Energies=      | -610.348378 |
| Sum of electronic and thermal Enthalpies=    | -610.347434 |
| Sum of electronic and thermal Free Energies= | -610.393581 |

|   |             |             |             |
|---|-------------|-------------|-------------|
| C | 0.42440500  | 0.27610100  | 0.92495000  |
| H | 1.17723400  | 0.86511000  | 1.43387700  |
| C | -0.64018100 | 1.13722300  | 0.25628400  |
| H | -0.16033700 | 1.91680900  | -0.33330500 |
| H | -1.28291000 | 0.53175400  | -0.37448500 |
| C | -2.10836800 | 2.56359900  | 0.56734000  |
| C | -1.64591900 | 3.94556400  | 0.38383200  |
| C | -1.62052800 | 1.71465600  | 1.56574800  |
| C | -0.50429100 | 4.33327900  | 1.31439200  |
| H | -2.54962800 | 4.54196800  | 0.60060400  |
| H | -1.44994500 | 4.13806900  | -0.67521600 |
| C | -0.88834000 | 2.30357100  | 2.76485300  |
| H | -2.21059000 | 0.82416800  | 1.76295700  |
| C | -0.80227000 | 3.83112000  | 2.72306300  |
| H | 0.43329500  | 3.90221000  | 0.94919000  |
| H | -0.37712200 | 5.41409600  | 1.30012900  |
| H | -1.43536300 | 1.98227800  | 3.65193000  |
| H | 0.10478100  | 1.86819800  | 2.85961200  |
| H | -1.75016200 | 4.26043900  | 3.05846000  |
| H | -0.04071800 | 4.16964200  | 3.42301100  |
| H | -2.85330900 | 2.18037300  | -0.12544900 |
| H | -0.00084000 | -0.46415500 | 1.59549600  |
| I | 1.44906100  | -0.78208500 | -0.61925400 |

## 30.I

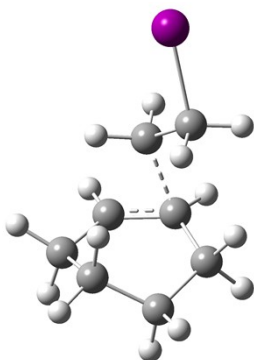

```

Zero-point correction=                0.205944
(Hartree/Particle)
Thermal correction to Energy=         0.215765
Thermal correction to Enthalpy=       0.216709
Thermal correction to Gibbs Free Energy= 0.168792
Sum of electronic and zero-point Energies= -610.357584
Sum of electronic and thermal Energies= -610.347763
Sum of electronic and thermal Enthalpies= -610.346819
Sum of electronic and thermal Free Energies= -610.394736

```

|   |             |             |             |
|---|-------------|-------------|-------------|
| C | -0.91317600 | 0.37584300  | 0.25555300  |
| H | -0.92594600 | -0.51515500 | 0.87326700  |
| C | 0.44072700  | 0.62906900  | -0.38212900 |
| H | 1.23111900  | 0.73367400  | 0.35430000  |
| H | 0.43513700  | 1.47715300  | -1.05740200 |
| C | -2.41458200 | 1.42407000  | 1.00018600  |
| C | -3.11979100 | 2.26604300  | 0.00707000  |
| C | -1.11988300 | 1.68960400  | 1.43803500  |
| C | -2.19162200 | 3.24828900  | -0.69701100 |
| H | -3.87132900 | 2.80506200  | 0.60427200  |
| H | -3.69566200 | 1.64089100  | -0.67829600 |
| C | -0.45573500 | 3.01830400  | 1.14309800  |
| H | -0.78264500 | 1.17735600  | 2.33254900  |
| C | -1.33213900 | 3.97840800  | 0.33031500  |
| H | -1.56558900 | 2.71023900  | -1.41569100 |
| H | -2.78480800 | 3.95513200  | -1.27431600 |
| H | -0.22629100 | 3.45498600  | 2.11684300  |
| H | 0.51185900  | 2.86242800  | 0.66754900  |
| H | -1.99242100 | 4.52388400  | 1.00874900  |
| H | -0.70220300 | 4.72206300  | -0.15428800 |
| H | -2.95641600 | 0.59394100  | 1.44530400  |
| H | -1.65588800 | 0.26777500  | -0.53760400 |
| I | 0.91353900  | -1.08712100 | -1.56177600 |

**TS31.I**

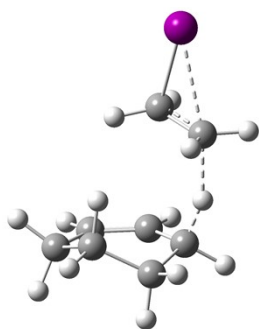

|                                              |             |
|----------------------------------------------|-------------|
| Zero-point correction=                       | 0.200691    |
| (Hartree/Particle)                           |             |
| Thermal correction to Energy=                | 0.210730    |
| Thermal correction to Enthalpy=              | 0.211674    |
| Thermal correction to Gibbs Free Energy=     | 0.162628    |
| Sum of electronic and zero-point Energies=   | -610.329245 |
| Sum of electronic and thermal Energies=      | -610.319206 |
| Sum of electronic and thermal Enthalpies=    | -610.318262 |
| Sum of electronic and thermal Free Energies= | -610.367309 |

|   |             |             |             |
|---|-------------|-------------|-------------|
| C | -0.25697100 | -0.02676000 | -0.27713600 |
| H | -0.21767300 | -0.59208100 | 0.64532800  |
| C | 0.69336700  | 1.04683200  | -0.44513900 |
| H | 1.63825400  | 1.02284900  | 0.08555000  |
| H | 0.59383100  | 1.73686300  | -1.27519900 |
| C | -2.79981900 | 1.70772700  | 1.35357100  |
| C | -3.35577900 | 2.47147000  | 0.19120300  |
| C | -1.54681900 | 1.83721800  | 1.79885700  |
| C | -2.26786900 | 3.13448100  | -0.64976200 |
| H | -4.04412500 | 3.22807500  | 0.58452700  |
| H | -3.97408500 | 1.81126200  | -0.42096000 |
| C | -0.59065400 | 2.78709500  | 1.18305800  |
| H | -1.21838800 | 1.27420900  | 2.66515400  |
| C | -1.21889300 | 3.79527100  | 0.23855600  |
| H | -1.78883600 | 2.38186000  | -1.28712900 |
| H | -2.70674400 | 3.86638800  | -1.32657800 |
| H | 0.07739300  | 3.24271500  | 1.91611500  |
| H | 0.17036400  | 2.16035800  | 0.56666400  |
| H | -1.69377100 | 4.56653800  | 0.85276000  |
| H | -0.45267600 | 4.29861000  | -0.35269500 |
| H | -3.47886000 | 1.04840300  | 1.88402700  |
| H | -1.24701500 | 0.10884000  | -0.69338000 |
| I | 0.94882300  | -1.08228500 | -1.75481400 |

32.I

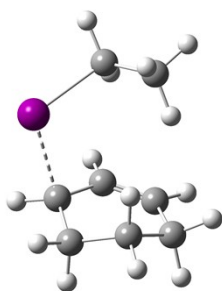

Zero-point correction= 0.203438  
 (Hartree/Particle)  
 Thermal correction to Energy= 0.214082  
 Thermal correction to Enthalpy= 0.215026  
 Thermal correction to Gibbs Free Energy= 0.165922  
 Sum of electronic and zero-point Energies= -610.374732  
 Sum of electronic and thermal Energies= -610.364089  
 Sum of electronic and thermal Enthalpies= -610.363144  
 Sum of electronic and thermal Free Energies= -610.412248

|   |             |             |             |
|---|-------------|-------------|-------------|
| C | 0.16679400  | -0.09430500 | -0.15311300 |
| H | 0.53166300  | -1.06549700 | -0.47715500 |
| C | 0.98029900  | 1.06995600  | -0.65317800 |
| H | 1.04347700  | 1.08730800  | -1.73968100 |
| H | 0.58087900  | 2.01940800  | -0.30009700 |
| C | -2.86826300 | 1.44269100  | 0.59480700  |
| C | -3.23186800 | 2.66246100  | -0.20176800 |
| C | -1.91272400 | 1.61887400  | 1.67666600  |
| C | -2.02807500 | 3.55972300  | -0.44656500 |
| H | -3.96900900 | 3.18411100  | 0.42494700  |
| H | -3.74831200 | 2.40085200  | -1.12437600 |
| C | -1.24947200 | 2.77601100  | 1.81851600  |
| H | -1.82049900 | 0.83117600  | 2.41412700  |
| C | -1.34752400 | 3.92520800  | 0.87041400  |
| H | -1.32306500 | 3.03843500  | -1.10031300 |
| H | -2.33463500 | 4.46011500  | -0.97594000 |
| H | -0.63722400 | 2.91586200  | 2.70372900  |
| H | 1.99260300  | 0.96247600  | -0.25612300 |
| H | -1.89850600 | 4.72230300  | 1.38479700  |
| H | -0.35037800 | 4.33745800  | 0.69800600  |
| H | -3.69147700 | 0.77115900  | 0.81822000  |
| H | 0.00649300  | -0.09597700 | 0.92198000  |
| I | -1.84962100 | -0.09439000 | -0.94643000 |

## 2-Iodoethane

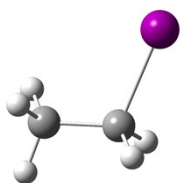

|                                              |  |  |             |
|----------------------------------------------|--|--|-------------|
| Zero-point correction=                       |  |  | 0.066004    |
| (Hartree/Particle)                           |  |  |             |
| Thermal correction to Energy=                |  |  | 0.070218    |
| Thermal correction to Enthalpy=              |  |  | 0.071162    |
| Thermal correction to Gibbs Free Energy=     |  |  | 0.037809    |
| Sum of electronic and zero-point Energies=   |  |  | -376.773188 |
| Sum of electronic and thermal Energies=      |  |  | -376.768975 |
| Sum of electronic and thermal Enthalpies=    |  |  | -376.768031 |
| Sum of electronic and thermal Free Energies= |  |  | -376.801384 |

|   |             |             |             |
|---|-------------|-------------|-------------|
| C | -1.70414400 | 0.33752200  | -0.00210200 |
| H | -1.34179100 | -0.69347700 | -0.00373900 |
| H | -1.35069000 | 0.82638000  | -0.90880500 |
| H | -2.79276600 | 0.31825900  | -0.02651600 |
| C | -1.19684100 | 1.04476100  | 1.23435000  |
| H | -1.56174500 | 0.59543300  | 2.15254200  |
| H | -0.11354100 | 1.10474400  | 1.26709600  |
| I | -1.86514900 | 3.08612500  | 1.31585400  |

**Figure 7**

*cis*-Cyclooctene

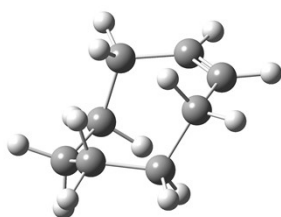

|                                              |  |  |             |
|----------------------------------------------|--|--|-------------|
| Zero-point correction=                       |  |  | 0.205486    |
| (Hartree/Particle)                           |  |  |             |
| Thermal correction to Energy=                |  |  | 0.213337    |
| Thermal correction to Enthalpy=              |  |  | 0.214281    |
| Thermal correction to Gibbs Free Energy=     |  |  | 0.173596    |
| Sum of electronic and zero-point Energies=   |  |  | -313.004886 |
| Sum of electronic and thermal Energies=      |  |  | -312.997035 |
| Sum of electronic and thermal Enthalpies=    |  |  | -312.996091 |
| Sum of electronic and thermal Free Energies= |  |  | -313.036776 |

|   |             |             |             |
|---|-------------|-------------|-------------|
| C | -1.94670700 | 0.02275200  | -0.20511800 |
| C | -1.27792700 | 1.29987800  | 0.23751700  |
| C | 1.00800400  | -1.32016000 | -0.46296800 |
| C | 0.09697800  | 1.63006900  | -0.39235800 |
| C | 1.96732200  | -0.18130200 | -0.10756300 |
| C | 1.32164500  | 1.11793700  | 0.38550200  |
| H | -1.16177800 | 1.29448400  | 1.32662000  |
| H | 0.12245000  | 1.27389100  | -1.42557400 |
| H | 0.56298800  | -1.12127900 | -1.43945200 |
| H | 2.57609900  | 0.03439800  | -0.99000600 |
| H | -2.90347000 | 0.13205100  | -0.70548100 |

|   |             |             |             |
|---|-------------|-------------|-------------|
| H | -1.95917700 | 2.12224300  | 0.01715500  |
| H | 1.59085700  | -2.23580800 | -0.57856000 |
| H | 0.16845200  | 2.71774100  | -0.44645600 |
| H | 2.66349000  | -0.52232300 | 0.66415100  |
| H | 2.09736000  | 1.88672200  | 0.36829100  |
| H | 1.04561200  | 1.01510300  | 1.43807100  |
| C | -1.47398700 | -1.20706900 | -0.03842600 |
| H | -2.06028400 | -2.03765100 | -0.41903700 |
| C | -0.13565300 | -1.53941600 | 0.55773100  |
| H | 0.03733000  | -0.92206600 | 1.44316000  |
| H | -0.13798600 | -2.57363700 | 0.90121900  |

### 33.I

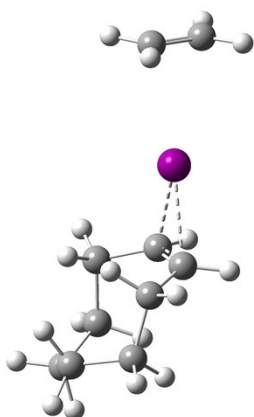

|                                              |             |
|----------------------------------------------|-------------|
| Zero-point correction=                       | 0.260211    |
| (Hartree/Particle)                           |             |
| Thermal correction to Energy=                | 0.274280    |
| Thermal correction to Enthalpy=              | 0.275225    |
| Thermal correction to Gibbs Free Energy=     | 0.216904    |
| Sum of electronic and zero-point Energies=   | -688.905782 |
| Sum of electronic and thermal Energies=      | -688.891713 |
| Sum of electronic and thermal Enthalpies=    | -688.890769 |
| Sum of electronic and thermal Free Energies= | -688.949090 |

|   |             |             |             |
|---|-------------|-------------|-------------|
| C | -1.10917100 | -0.59934500 | -0.55100100 |
| H | -0.49692800 | -1.43434400 | -0.87952900 |
| C | -1.10126300 | -0.32210100 | 0.84132300  |
| H | -0.50190600 | -0.98734100 | 1.45627900  |
| C | -2.21704300 | -0.19612100 | -1.45805100 |
| H | -2.61519500 | 0.78243500  | -1.19249000 |
| H | -1.86380800 | -0.15130100 | -2.48553800 |
| C | -2.14695100 | 0.48902500  | 1.54128300  |
| H | -1.77473100 | 0.72148400  | 2.53757200  |
| H | -2.31008800 | 1.43790500  | 1.03009400  |
| C | -3.50155900 | -0.26893200 | 1.64104800  |
| H | -3.92163200 | -0.00531500 | 2.61077000  |
| H | -3.33876300 | -1.35009700 | 1.67544700  |
| C | -3.29842000 | -1.30524300 | -1.28146700 |
| H | -2.89693200 | -2.11122800 | -0.65918200 |



|   |             |             |             |
|---|-------------|-------------|-------------|
| H | -3.49463800 | -1.76228900 | -2.25048800 |
| C | -4.51741900 | 0.10337200  | 0.54786500  |
| H | -4.32659800 | 1.13100400  | 0.22816900  |
| H | -5.50917700 | 0.13062400  | 1.00085400  |
| C | -4.61445900 | -0.81678800 | -0.67379400 |
| H | -5.18994400 | -0.29434700 | -1.44062800 |
| H | -5.19420300 | -1.70375600 | -0.41064100 |
| C | 3.20776800  | 2.51152400  | -0.56608000 |
| H | 3.52972700  | 1.99387300  | -1.46198400 |
| H | 3.68556100  | 2.22555800  | 0.36350300  |
| C | 2.30921900  | 3.49399200  | -0.61430100 |
| H | 1.86723500  | 3.81204500  | -1.55113300 |
| H | 2.02306100  | 4.04390400  | 0.27451200  |
| I | 0.54765700  | 0.99589100  | -0.14555300 |

### Product 17.I

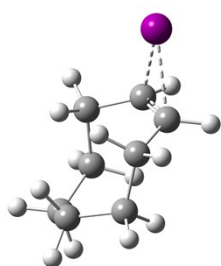

|                                              |             |
|----------------------------------------------|-------------|
| Zero-point correction=                       | 0.207352    |
| (Hartree/Particle)                           |             |
| Thermal correction to Energy=                | 0.216725    |
| Thermal correction to Enthalpy=              | 0.217669    |
| Thermal correction to Gibbs Free Energy=     | 0.171792    |
| Sum of electronic and zero-point Energies=   | -610.373142 |
| Sum of electronic and thermal Energies=      | -610.363769 |
| Sum of electronic and thermal Enthalpies=    | -610.362825 |
| Sum of electronic and thermal Free Energies= | -610.408702 |

|   |             |             |             |
|---|-------------|-------------|-------------|
| C | -1.39383500 | -0.61297900 | -1.29067300 |
| H | -1.21485100 | -1.45899300 | -1.94816500 |
| C | -0.78217600 | -0.68869600 | 0.01339900  |
| H | -0.22930600 | -1.60106900 | 0.21942900  |
| C | -2.61919000 | 0.18187200  | -1.56025800 |
| H | -2.62398500 | 1.11660700  | -1.00160200 |
| H | -2.69380000 | 0.41445500  | -2.61966900 |
| C | -1.24455800 | 0.10035300  | 1.19703800  |
| H | -0.47689900 | 0.02357500  | 1.96514600  |
| H | -1.34903200 | 1.15613400  | 0.94818500  |
| C | -2.60236800 | -0.43065600 | 1.74266000  |
| H | -2.53894400 | -0.34511500 | 2.82650000  |
| H | -2.71247300 | -1.50009400 | 1.53984500  |
| C | -3.78109600 | -0.75411200 | -1.10226200 |
| H | -3.37794100 | -1.73363900 | -0.82386300 |
| H | -4.43100300 | -0.94589100 | -1.95489300 |

|   |             |             |             |
|---|-------------|-------------|-------------|
| C | -3.83045700 | 0.35686900  | 1.25610900  |
| H | -3.52776500 | 1.38682700  | 1.05107900  |
| H | -4.53481900 | 0.43196300  | 2.08523700  |
| C | -4.60756500 | -0.21110400 | 0.06360400  |
| H | -5.27701500 | 0.56876600  | -0.30426700 |
| H | -5.24820300 | -1.02595800 | 0.40638800  |
| I | 0.61887200  | 0.44893400  | -1.36255800 |

### 34.I

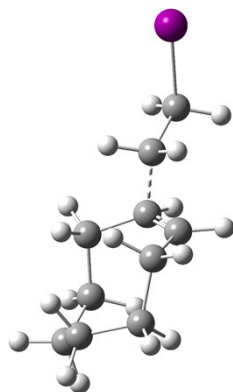

|                                              |             |
|----------------------------------------------|-------------|
| Zero-point correction=                       | 0.263703    |
| (Hartree/Particle)                           |             |
| Thermal correction to Energy=                | 0.276084    |
| Thermal correction to Enthalpy=              | 0.277029    |
| Thermal correction to Gibbs Free Energy=     | 0.222740    |
| Sum of electronic and zero-point Energies=   | -688.908710 |
| Sum of electronic and thermal Energies=      | -688.896329 |
| Sum of electronic and thermal Enthalpies=    | -688.895385 |
| Sum of electronic and thermal Free Energies= | -688.949674 |

|   |             |            |             |
|---|-------------|------------|-------------|
| C | 0.35145000  | 1.86938500 | -0.13981400 |
| H | -0.32076900 | 1.11441700 | -0.54250100 |
| C | 1.79676900  | 1.44344600 | 0.01565900  |
| H | 1.89152600  | 0.58855400 | 0.67844700  |
| H | 2.42147900  | 2.25860700 | 0.37081300  |
| C | -0.27544300 | 2.08432900 | 1.41504400  |
| C | -0.59984300 | 3.30828400 | 0.81486200  |
| H | 0.14439200  | 4.09930900 | 0.87743800  |
| H | 0.58972800  | 2.11603800 | 2.07184200  |
| H | 0.30785300  | 2.70715900 | -0.84961200 |
| C | -1.90411800 | 3.64039700 | 0.20463700  |
| H | -1.78530900 | 4.48932400 | -0.46528300 |
| H | -2.29030100 | 2.79929400 | -0.37282500 |
| C | -1.32539400 | 1.08588200 | 1.83141500  |
| H | -2.06538700 | 0.95147500 | 1.04139600  |
| H | -0.84601900 | 0.11946900 | 1.98566500  |
| C | -2.93567300 | 3.98257200 | 1.33222100  |
| H | -3.54535600 | 4.78822700 | 0.92647100  |
| H | -2.43001800 | 4.40581800 | 2.20487100  |

|   |             |            |             |
|---|-------------|------------|-------------|
| C | -1.99192300 | 1.59788200 | 3.12910700  |
| H | -1.92187500 | 0.83432400 | 3.90268900  |
| H | -1.42049000 | 2.44850200 | 3.51144500  |
| C | -3.46184700 | 2.00432200 | 2.97908900  |
| H | -4.08347300 | 1.10683800 | 2.98959500  |
| H | -3.73600100 | 2.57029100 | 3.87143300  |
| C | -3.84602600 | 2.81161800 | 1.73441100  |
| H | -4.84335400 | 3.21482600 | 1.91555000  |
| H | -3.96450500 | 2.14671500 | 0.87535500  |
| I | 2.56281700  | 0.85082000 | -1.88413400 |

### TS35.I

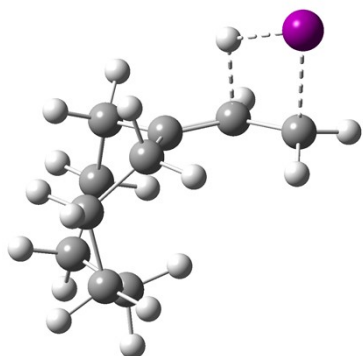

|                                              |             |
|----------------------------------------------|-------------|
| Zero-point correction=                       | 0.257490    |
| (Hartree/Particle)                           |             |
| Thermal correction to Energy=                | 0.269213    |
| Thermal correction to Enthalpy=              | 0.270158    |
| Thermal correction to Gibbs Free Energy=     | 0.218208    |
| Sum of electronic and zero-point Energies=   | -688.885475 |
| Sum of electronic and thermal Energies=      | -688.873752 |
| Sum of electronic and thermal Enthalpies=    | -688.872807 |
| Sum of electronic and thermal Free Energies= | -688.924757 |

|   |             |             |             |
|---|-------------|-------------|-------------|
| C | -0.05364100 | 0.06509300  | -0.34589400 |
| H | -0.09560800 | -0.32606700 | -1.35551600 |
| H | -0.62351300 | -0.53155500 | 0.35699000  |
| C | -0.46823000 | 2.23814900  | 0.89467400  |
| H | 1.48057200  | 1.44067700  | 0.34286100  |
| C | -1.99540100 | 4.17207500  | 0.26842600  |
| H | -1.93908500 | 5.24985100  | 0.10833400  |
| H | -2.14182900 | 3.71785300  | -0.71623100 |
| C | -0.58117700 | 1.58360800  | 2.23942300  |
| H | -0.69844900 | 0.50153800  | 2.15084100  |
| H | 0.39132100  | 1.74796200  | 2.72585100  |
| C | -3.20523000 | 3.85775700  | 1.14562500  |
| H | -4.06845300 | 4.32141000  | 0.66692600  |
| H | -3.10180400 | 4.35830400  | 2.11278600  |
| C | -1.66594100 | 2.13446400  | 3.17105600  |
| H | -1.49582000 | 1.70262200  | 4.15797000  |
| H | -1.53604600 | 3.21075400  | 3.29167200  |
| C | -3.09102600 | 1.82141100  | 2.72914600  |

|   |             |             |             |
|---|-------------|-------------|-------------|
| H | -3.24739100 | 0.73902300  | 2.75136200  |
| H | -3.77000200 | 2.24161000  | 3.47480200  |
| C | -3.48335700 | 2.35898700  | 1.35183300  |
| H | -4.54744100 | 2.16375400  | 1.21494500  |
| H | -2.98542700 | 1.78335400  | 0.56403000  |
| I | 2.07686300  | -0.21431900 | 0.27354000  |
| C | -0.61459400 | 3.73069400  | 0.79992000  |
| H | -0.42462600 | 4.19075200  | 1.76986300  |
| H | 0.13808300  | 4.11142700  | 0.10677500  |
| C | -0.16469800 | 1.54944800  | -0.23849100 |
| H | -0.06757900 | 2.09096800  | -1.17476500 |

## Product 18

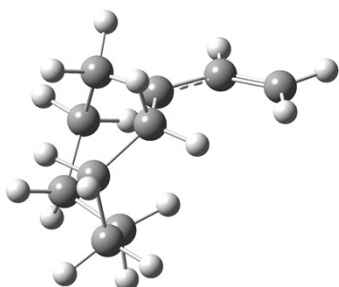

|                                              |             |
|----------------------------------------------|-------------|
| Zero-point correction=                       | 0.250520    |
| (Hartree/Particle)                           |             |
| Thermal correction to Energy=                | 0.260570    |
| Thermal correction to Enthalpy=              | 0.261514    |
| Thermal correction to Gibbs Free Energy=     | 0.215727    |
| Sum of electronic and zero-point Energies=   | -390.699784 |
| Sum of electronic and thermal Energies=      | -390.689734 |
| Sum of electronic and thermal Enthalpies=    | -390.688790 |
| Sum of electronic and thermal Free Energies= | -390.734578 |

|   |             |             |             |
|---|-------------|-------------|-------------|
| C | -0.15441700 | 0.17895000  | -0.40768900 |
| H | 0.06850600  | -0.28369100 | -1.36129500 |
| H | -0.23406600 | -0.48361300 | 0.44387900  |
| C | -0.55009900 | 2.20994200  | 0.90812600  |
| C | -1.99303400 | 4.15229500  | 0.24688500  |
| H | -1.87805200 | 5.22258600  | 0.07708300  |
| H | -2.14249200 | 3.68452100  | -0.72886500 |
| C | -0.64420300 | 1.54785400  | 2.21752500  |
| H | -0.75623400 | 0.46888600  | 2.13379100  |
| H | 0.35756900  | 1.73173300  | 2.64578400  |
| C | -3.19157800 | 3.87540900  | 1.14564600  |
| H | -4.05320700 | 4.34318500  | 0.66718300  |
| H | -3.06579600 | 4.39140800  | 2.10123900  |
| C | -1.68077300 | 2.12625100  | 3.19595900  |
| H | -1.49749600 | 1.66664700  | 4.16669800  |
| H | -1.51496200 | 3.19497700  | 3.33236100  |
| C | -3.11692800 | 1.85592400  | 2.75915100  |
| H | -3.31250500 | 0.78110600  | 2.79455200  |
| H | -3.78093500 | 2.31182800  | 3.49740100  |

|   |             |            |             |
|---|-------------|------------|-------------|
| C | -3.47368700 | 2.38232800 | 1.37129400  |
| H | -4.53000700 | 2.17444100 | 1.19653600  |
| H | -2.95451000 | 1.79411000 | 0.60164400  |
| C | -0.61652900 | 3.67395700 | 0.82777600  |
| H | -0.45426800 | 4.14254700 | 1.79558700  |
| H | 0.14744900  | 4.01358500 | 0.12318000  |
| C | -0.30726000 | 1.51077700 | -0.31807800 |
| H | -0.20744800 | 2.11730300 | -1.21099900 |

### TS36.I

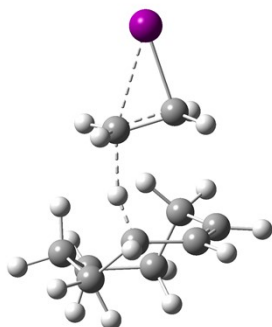

|                                              |             |
|----------------------------------------------|-------------|
| Zero-point correction=                       | 0.258827    |
| (Hartree/Particle)                           |             |
| Thermal correction to Energy=                | 0.271290    |
| Thermal correction to Enthalpy=              | 0.272234    |
| Thermal correction to Gibbs Free Energy=     | 0.217953    |
| Sum of electronic and zero-point Energies=   | -688.868773 |
| Sum of electronic and thermal Energies=      | -688.856309 |
| Sum of electronic and thermal Enthalpies=    | -688.855365 |
| Sum of electronic and thermal Free Energies= | -688.909646 |

|   |             |            |             |
|---|-------------|------------|-------------|
| C | -0.46919700 | 2.33914700 | -1.17588900 |
| H | -1.30625500 | 1.65358200 | -1.24668800 |
| C | 0.79730700  | 1.87794000 | -0.65404400 |
| H | 0.77587900  | 1.05751900 | 0.05193200  |
| H | 1.55896100  | 2.62374300 | -0.46631400 |
| C | 0.04433200  | 2.24758400 | 2.52227100  |
| C | -0.07744500 | 3.41315500 | 1.88237000  |
| H | 0.68653400  | 4.16750600 | 2.03509900  |
| H | 0.89126200  | 2.12848200 | 3.19065600  |
| H | -0.51133100 | 3.24439000 | -1.76891500 |
| C | -1.17694000 | 3.78687700 | 0.95375600  |
| H | -0.94678600 | 4.74285900 | 0.48399900  |
| H | -1.13854800 | 3.04183400 | 0.05710900  |
| C | -0.94233700 | 1.12214700 | 2.46832600  |
| H | -1.27154700 | 0.95214300 | 1.43748800  |
| H | -0.46535600 | 0.20066800 | 2.79778800  |
| C | -2.65271500 | 3.76768000 | 1.39624600  |
| H | -3.16749300 | 4.50013200 | 0.77510300  |
| H | -2.68952000 | 4.15119800 | 2.41952600  |
| C | -2.17897700 | 1.43661900 | 3.35100500  |
| H | -2.30526600 | 0.65535600 | 4.09978100  |

|   |             |            |             |
|---|-------------|------------|-------------|
| H | -1.98828300 | 2.35622500 | 3.90682400  |
| C | -3.48189700 | 1.57999700 | 2.56431300  |
| H | -3.84955800 | 0.59041000 | 2.28282100  |
| H | -4.23381400 | 2.00432300 | 3.23280600  |
| C | -3.40857400 | 2.43224400 | 1.29500100  |
| H | -4.43212200 | 2.64822400 | 0.98700500  |
| H | -2.98903900 | 1.84428300 | 0.47249900  |
| I | 1.16628900  | 1.03667400 | -2.62863600 |

## Product 19

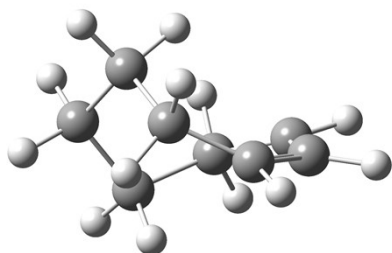

|                                              |             |
|----------------------------------------------|-------------|
| Zero-point correction=                       | 0.191741    |
| (Hartree/Particle)                           |             |
| Thermal correction to Energy=                | 0.199477    |
| Thermal correction to Enthalpy=              | 0.200421    |
| Thermal correction to Gibbs Free Energy=     | 0.160196    |
| Sum of electronic and zero-point Energies=   | -312.130724 |
| Sum of electronic and thermal Energies=      | -312.122989 |
| Sum of electronic and thermal Enthalpies=    | -312.122044 |
| Sum of electronic and thermal Free Energies= | -312.162270 |

|   |             |            |             |
|---|-------------|------------|-------------|
| C | -0.79061500 | 2.51814100 | 0.74542300  |
| C | -0.19139300 | 3.51421400 | 1.49061800  |
| H | 0.70742000  | 3.21244200 | 2.02241000  |
| H | -0.16667500 | 1.64419400 | 0.56541900  |
| C | -0.55742800 | 4.83413500 | 1.66628400  |
| H | -0.07405500 | 5.33444600 | 2.50385700  |
| C | -2.18776800 | 2.33805100 | 0.33905900  |
| H | -2.18657900 | 2.05982800 | -0.72685400 |
| H | -2.44697300 | 1.37852400 | 0.81872200  |
| C | -1.31454500 | 5.73962600 | 0.79681700  |
| H | -0.57997400 | 6.53943800 | 0.60001700  |
| H | -2.04910100 | 6.26432400 | 1.42834500  |
| C | -3.22715300 | 3.39664000 | 0.66936000  |
| H | -4.20433700 | 2.91520400 | 0.69116400  |
| H | -3.05436200 | 3.76614800 | 1.68566000  |
| C | -3.26218500 | 4.54762900 | -0.32800700 |
| H | -3.60260300 | 4.17833900 | -1.29719700 |
| H | -4.00187700 | 5.27988100 | 0.00103000  |
| C | -1.91362000 | 5.23381600 | -0.50516200 |
| H | -2.03282000 | 6.08478300 | -1.17505900 |
| H | -1.19761200 | 4.56622500 | -0.99585300 |

## Scheme 5

### Styrene

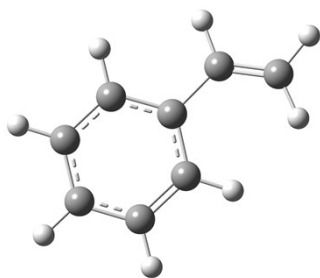

|                                              |             |
|----------------------------------------------|-------------|
| Zero-point correction=                       | 0.134278    |
| (Hartree/Particle)                           |             |
| Thermal correction to Energy=                | 0.141050    |
| Thermal correction to Enthalpy=              | 0.141994    |
| Thermal correction to Gibbs Free Energy=     | 0.102425    |
| Sum of electronic and zero-point Energies=   | -309.482896 |
| Sum of electronic and thermal Energies=      | -309.476124 |
| Sum of electronic and thermal Enthalpies=    | -309.475180 |
| Sum of electronic and thermal Free Energies= | -309.514749 |

|   |             |             |             |
|---|-------------|-------------|-------------|
| C | 2.24803500  | 0.26278300  | 0.03030000  |
| C | 1.77051900  | -1.03877200 | 0.03735900  |
| C | 0.40407100  | -1.27599400 | 0.00121700  |
| C | -0.50944900 | -0.22292500 | -0.03654400 |
| C | -0.01345700 | 1.08290900  | -0.05162300 |
| C | 1.34900600  | 1.32259300  | -0.01665100 |
| H | 3.31289800  | 0.45346500  | 0.05583100  |
| H | 2.46136200  | -1.87131100 | 0.06925800  |
| H | 0.03330600  | -2.29431400 | 0.00647300  |
| H | -0.69864900 | 1.91912100  | -0.10243900 |
| H | 1.71498700  | 2.34117200  | -0.03134800 |
| C | -1.94868900 | -0.52845900 | -0.06030300 |
| H | -2.18911700 | -1.57860400 | -0.19734200 |
| C | -2.94655500 | 0.33641100  | 0.08125000  |
| H | -2.78039900 | 1.39427700  | 0.24042000  |
| H | -3.97527100 | 0.00492800  | 0.04911000  |

### 37.I

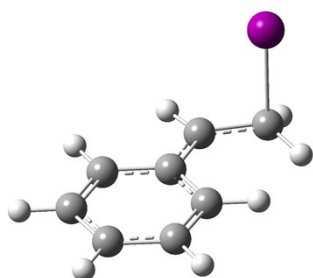

|                                              |  |  |             |
|----------------------------------------------|--|--|-------------|
| Zero-point correction=                       |  |  | 0.136751    |
| (Hartree/Particle)                           |  |  |             |
| Thermal correction to Energy=                |  |  | 0.144957    |
| Thermal correction to Enthalpy=              |  |  | 0.145901    |
| Thermal correction to Gibbs Free Energy=     |  |  | 0.101056    |
| Sum of electronic and zero-point Energies=   |  |  | -606.841880 |
| Sum of electronic and thermal Energies=      |  |  | -606.833674 |
| Sum of electronic and thermal Enthalpies=    |  |  | -606.832730 |
| Sum of electronic and thermal Free Energies= |  |  | -606.877576 |

|   |             |             |             |
|---|-------------|-------------|-------------|
| C | -2.96589500 | -0.96597200 | 0.00914100  |
| C | -1.60142500 | -0.96682800 | 0.19117100  |
| C | -0.89845500 | 0.25497400  | 0.30956200  |
| C | -1.60446100 | 1.47887100  | 0.22470800  |
| C | -2.96392600 | 1.46901200  | 0.03639500  |
| C | -3.64167400 | 0.24939500  | -0.06906700 |
| H | -3.50833300 | -1.89714700 | -0.07504800 |
| H | -1.05527300 | -1.90044600 | 0.25152300  |
| H | -1.08056700 | 2.42257800  | 0.30026600  |
| H | -3.51273900 | 2.39804500  | -0.02985600 |
| H | -4.71463500 | 0.25231400  | -0.21554800 |
| C | 0.48619600  | 0.19110200  | 0.53974100  |
| H | 0.92541800  | -0.79896200 | 0.62840100  |
| C | 1.39943400  | 1.29785200  | 0.72037800  |
| H | 2.27076300  | 1.08889600  | 1.32978800  |
| H | 0.98282300  | 2.28536700  | 0.86657900  |
| I | 2.07137100  | 1.13909200  | -1.34113500 |

**Figure 8**

**38.Br**

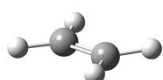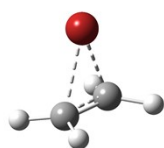

|                                              |  |  |              |
|----------------------------------------------|--|--|--------------|
| Zero-point correction=                       |  |  | 0.107728     |
| (Hartree/Particle)                           |  |  |              |
| Thermal correction to Energy=                |  |  | 0.116038     |
| Thermal correction to Enthalpy=              |  |  | 0.116982     |
| Thermal correction to Gibbs Free Energy=     |  |  | 0.071628     |
| Sum of electronic and zero-point Energies=   |  |  | -2730.936592 |
| Sum of electronic and thermal Energies=      |  |  | -2730.928283 |
| Sum of electronic and thermal Enthalpies=    |  |  | -2730.927339 |
| Sum of electronic and thermal Free Energies= |  |  | -2730.972693 |

|   |            |             |            |
|---|------------|-------------|------------|
| C | 2.40132100 | -0.59465800 | 0.10803700 |
|---|------------|-------------|------------|



|    |             |             |             |
|----|-------------|-------------|-------------|
| H  | 2.45129400  | -1.20862300 | -0.78367400 |
| H  | 2.40976500  | -1.11286200 | 1.05988200  |
| C  | 2.39381500  | 0.73413700  | 0.03888400  |
| H  | 2.43749700  | 1.25267100  | -0.91182300 |
| H  | 2.39570500  | 1.34853800  | 0.93169100  |
| C  | -2.49145100 | 0.01468900  | -0.75446800 |
| H  | -2.63227400 | 0.92821700  | -1.31795900 |
| C  | -2.52611600 | 0.04715400  | 0.67632700  |
| H  | -2.69311800 | 0.98507600  | 1.19038300  |
| H  | -2.67864900 | -0.86877800 | 1.23281200  |
| H  | -2.61792100 | -0.92565500 | -1.27566500 |
| Br | -0.58499100 | 0.04683900  | 0.00708700  |

### TS39.Br

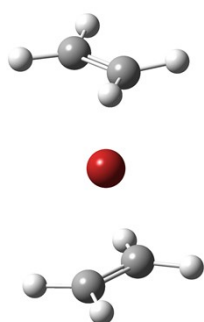

|                                              |              |
|----------------------------------------------|--------------|
| Zero-point correction=                       | 0.107811     |
| (Hartree/Particle)                           |              |
| Thermal correction to Energy=                | 0.115006     |
| Thermal correction to Enthalpy=              | 0.115950     |
| Thermal correction to Gibbs Free Energy=     | 0.075269     |
| Sum of electronic and zero-point Energies=   | -2730.930074 |
| Sum of electronic and thermal Energies=      | -2730.922879 |
| Sum of electronic and thermal Enthalpies=    | -2730.921935 |
| Sum of electronic and thermal Free Energies= | -2730.962616 |

|    |             |             |             |
|----|-------------|-------------|-------------|
| C  | 1.99990500  | -0.61536400 | 0.09018300  |
| H  | 2.07969900  | -1.20758200 | -0.81297100 |
| H  | 2.03730500  | -1.13868700 | 1.03753500  |
| C  | 1.99054300  | 0.74886300  | 0.03912300  |
| H  | 2.06274300  | 1.27301000  | -0.90578500 |
| H  | 2.02022600  | 1.34202800  | 0.94467100  |
| C  | -2.60759200 | 0.00617200  | -0.72251500 |
| H  | -2.65556700 | 0.91038300  | -1.31653100 |
| C  | -2.63909500 | 0.05703900  | 0.64136700  |
| H  | -2.71289000 | 1.00287800  | 1.16360600  |
| H  | -2.70056400 | -0.84804100 | 1.23282200  |
| H  | -2.64336100 | -0.94052000 | -1.24714400 |
| Br | -0.31397600 | 0.04906600  | 0.01215400  |

### 38.I

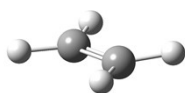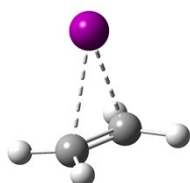

|                                              |             |
|----------------------------------------------|-------------|
| Zero-point correction=                       | 0.107580    |
| (Hartree/Particle)                           |             |
| Thermal correction to Energy=                | 0.115740    |
| Thermal correction to Enthalpy=              | 0.116684    |
| Thermal correction to Gibbs Free Energy=     | 0.072758    |
| Sum of electronic and zero-point Energies=   | -454.394023 |
| Sum of electronic and thermal Energies=      | -454.385863 |
| Sum of electronic and thermal Enthalpies=    | -454.384919 |
| Sum of electronic and thermal Free Energies= | -454.428845 |

|   |             |             |             |
|---|-------------|-------------|-------------|
| C | 2.42017700  | -0.60013100 | 0.10511200  |
| H | 2.48592500  | -1.20499000 | -0.79162200 |
| H | 2.44265900  | -1.12100200 | 1.05511800  |
| C | 2.41035100  | 0.74422200  | 0.04375200  |
| H | 2.46786400  | 1.26572200  | -0.90445100 |
| H | 2.42462500  | 1.34988000  | 0.94224600  |
| C | -2.55996500 | 0.00929700  | -0.73118100 |
| H | -2.64663400 | 0.91744300  | -1.31484700 |
| C | -2.59206900 | 0.05177000  | 0.65074100  |
| H | -2.70444800 | 0.99383200  | 1.17304200  |
| H | -2.69042400 | -0.85792000 | 1.23014100  |
| H | -2.63280500 | -0.93430900 | -1.25769200 |
| I | -0.26727900 | 0.04973000  | 0.01285500  |

### TS39.I

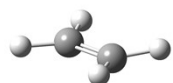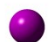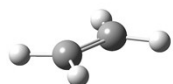

|                                            |             |
|--------------------------------------------|-------------|
| Zero-point correction=                     | 0.107567    |
| (Hartree/Particle)                         |             |
| Thermal correction to Energy=              | 0.114838    |
| Thermal correction to Enthalpy=            | 0.115783    |
| Thermal correction to Gibbs Free Energy=   | 0.074355    |
| Sum of electronic and zero-point Energies= | -454.393952 |

|                                              |             |
|----------------------------------------------|-------------|
| Sum of electronic and thermal Energies=      | -454.386680 |
| Sum of electronic and thermal Enthalpies=    | -454.385736 |
| Sum of electronic and thermal Free Energies= | -454.427164 |

|   |             |             |             |
|---|-------------|-------------|-------------|
| C | 2.16603700  | -0.61238300 | 0.09350400  |
| H | 2.25180700  | -1.20513400 | -0.80922500 |
| H | 2.20946100  | -1.13711800 | 1.04028600  |
| C | 2.15669700  | 0.74833700  | 0.04323600  |
| H | 2.23486900  | 1.27400700  | -0.90080500 |
| H | 2.19241200  | 1.34208500  | 0.94867200  |
| C | -2.77376900 | 0.00469800  | -0.72443200 |
| H | -2.82765100 | 0.90803900  | -1.32000000 |
| C | -2.80534600 | 0.05604700  | 0.63585000  |
| H | -2.88511900 | 1.00162500  | 1.15851100  |
| H | -2.87281100 | -0.84824900 | 1.22858300  |
| H | -2.81541900 | -0.94181400 | -1.24980400 |
| I | -0.31379100 | 0.04910200  | 0.01213700  |

### Footnote 91

#### TS40.Br

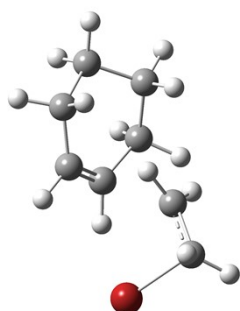

|                                              |              |
|----------------------------------------------|--------------|
| Zero-point correction=                       | 0.202396     |
| (Hartree/Particle)                           |              |
| Thermal correction to Energy=                | 0.212584     |
| Thermal correction to Enthalpy=              | 0.213528     |
| Thermal correction to Gibbs Free Energy=     | 0.164678     |
| Sum of electronic and zero-point Energies=   | -2886.865940 |
| Sum of electronic and thermal Energies=      | -2886.855752 |
| Sum of electronic and thermal Enthalpies=    | -2886.854808 |
| Sum of electronic and thermal Free Energies= | -2886.903658 |

|   |             |             |             |
|---|-------------|-------------|-------------|
| C | -1.48539100 | -0.41478300 | -0.51211300 |
| H | -2.36755600 | -0.73684000 | 0.02904600  |
| C | 0.64079700  | 2.18551200  | 1.46786900  |
| C | -0.21391600 | 3.35469400  | 1.84881700  |
| C | 1.38805500  | 2.15708700  | 0.34546300  |
| C | -0.40664600 | 4.33503500  | 0.69194000  |
| H | 0.26399100  | 3.85732700  | 2.69737100  |
| H | -1.17477200 | 3.00514700  | 2.24266700  |
| C | 1.47800100  | 3.30905000  | -0.60601700 |
| H | 2.00475300  | 1.28719400  | 0.14324200  |

|    |             |             |             |
|----|-------------|-------------|-------------|
| C  | 0.92034200  | 4.60007300  | -0.01075800 |
| H  | -1.12123300 | 3.92784700  | -0.03316200 |
| H  | -0.84417400 | 5.26149100  | 1.06142900  |
| H  | 2.52052400  | 3.42938500  | -0.90903900 |
| H  | 0.94793500  | 3.06247100  | -1.53871700 |
| H  | 1.63640900  | 4.99920200  | 0.71173900  |
| H  | 0.80284200  | 5.35074200  | -0.79104500 |
| H  | 0.69801900  | 1.35560400  | 2.16467300  |
| H  | -1.42019600 | -0.77269000 | -1.53316100 |
| Br | 0.07935400  | -1.12873100 | 0.45172500  |
| C  | -1.06558600 | 0.95074500  | -0.28971700 |
| H  | -0.51554800 | 1.48298600  | -1.05325400 |
| H  | -1.48467800 | 1.52219500  | 0.52778700  |

### TS40.I

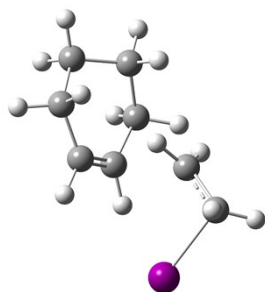

|                                              |             |
|----------------------------------------------|-------------|
| Zero-point correction=                       | 0.201952    |
| (Hartree/Particle)                           |             |
| Thermal correction to Energy=                | 0.212260    |
| Thermal correction to Enthalpy=              | 0.213204    |
| Thermal correction to Gibbs Free Energy=     | 0.163350    |
| Sum of electronic and zero-point Energies=   | -610.313905 |
| Sum of electronic and thermal Energies=      | -610.303597 |
| Sum of electronic and thermal Enthalpies=    | -610.302652 |
| Sum of electronic and thermal Free Energies= | -610.352506 |

|   |             |             |             |
|---|-------------|-------------|-------------|
| C | -1.47174900 | -0.39396700 | -0.50723700 |
| H | -2.35320200 | -0.71649300 | 0.03492100  |
| C | 0.63306500  | 2.18810400  | 1.46331800  |
| C | -0.21594900 | 3.36037600  | 1.84782500  |
| C | 1.37928100  | 2.15913200  | 0.34028200  |
| C | -0.40723100 | 4.34286500  | 0.69269500  |
| H | 0.26689000  | 3.86005500  | 2.69533900  |
| H | -1.17716300 | 3.01420500  | 2.24315000  |
| C | 1.47356200  | 3.31300400  | -0.60882200 |
| H | 1.99290300  | 1.28757600  | 0.13610000  |
| C | 0.91983100  | 4.60473400  | -0.01114000 |
| H | -1.12404800 | 3.93853800  | -0.03149500 |
| H | -0.84087100 | 5.27031000  | 1.06431800  |
| H | 2.51702700  | 3.43089500  | -0.90957600 |
| H | 0.94397700  | 3.06985700  | -1.54225800 |
| H | 1.63767600  | 5.00116300  | 0.71111400  |

|   |             |             |             |
|---|-------------|-------------|-------------|
| H | 0.80365200  | 5.35664500  | -0.79046400 |
| H | 0.68877500  | 1.35734800  | 2.15916600  |
| H | -1.39591500 | -0.75291700 | -1.52724800 |
| C | -1.06502400 | 0.95957500  | -0.29013900 |
| H | -0.52432300 | 1.49739100  | -1.05643800 |
| H | -1.49345700 | 1.53439200  | 0.52024300  |
| I | 0.19554100  | -1.34854800 | 0.53591200  |

### Thermochemical Data and Optimized Cartesian Coordinates for Structures Calculated at $\omega$ B97X-D3/def2-TZVP

Figure 3

#### Bromiranium Ion 6.Br

|                                  |     |                   |                |
|----------------------------------|-----|-------------------|----------------|
| Electronic energy                | ... | -2652.50426923 Eh |                |
| Zero point energy                | ... | 0.05526118 Eh     | 34.68 kcal/mol |
| Thermal vibrational correction   | ... | 0.00069555 Eh     | 0.44 kcal/mol  |
| Thermal rotational correction    | ... | 0.00141627 Eh     | 0.89 kcal/mol  |
| Thermal translational correction | ... | 0.00141627 Eh     | 0.89 kcal/mol  |
| Total Enthalpy                   | ... | -2652.44453575 Eh |                |
| Final Gibbs free energy          | ... | -2652.47561691 Eh |                |

|    |          |         |          |
|----|----------|---------|----------|
| C  | -2.14566 | 0.66212 | 0.27984  |
| H  | -1.67455 | 0.55615 | -0.69032 |
| H  | -3.08928 | 0.15308 | 0.43745  |
| C  | -1.34915 | 1.06545 | 1.42097  |
| H  | -0.29018 | 1.25651 | 1.29260  |
| H  | -1.70302 | 0.85410 | 2.42327  |
| Br | -2.38419 | 2.61113 | 0.67676  |

#### Cyclohexene

|                                  |     |                  |                |
|----------------------------------|-----|------------------|----------------|
| Electronic energy                | ... | -234.66872462 Eh |                |
| Zero point energy                | ... | 0.14749906 Eh    | 92.56 kcal/mol |
| Thermal vibrational correction   | ... | 0.00262547 Eh    | 1.65 kcal/mol  |
| Thermal rotational correction    | ... | 0.00141627 Eh    | 0.89 kcal/mol  |
| Thermal translational correction | ... | 0.00141627 Eh    | 0.89 kcal/mol  |
| Total Enthalpy                   | ... | -234.51482334 Eh |                |
| Final Gibbs free energy          | ... | -234.54916540 Eh |                |

|   |          |          |          |
|---|----------|----------|----------|
| C | 0.66114  | 1.29859  | 0.05633  |
| C | -0.66114 | 1.29859  | -0.05633 |
| C | -1.48959 | 0.04563  | -0.10776 |
| C | -0.69179 | -1.18343 | 0.32090  |
| C | 0.69179  | -1.18343 | -0.32090 |
| C | 1.48959  | 0.04563  | 0.10776  |
| H | -2.37240 | 0.16468  | 0.52692  |
| H | -1.18958 | 2.24567  | -0.11167 |

|   |          |          |          |
|---|----------|----------|----------|
| H | 1.18958  | 2.24567  | 0.11167  |
| H | -0.58064 | -1.17691 | 1.41055  |
| H | -1.23675 | -2.09545 | 0.06671  |
| H | 1.23675  | -2.09545 | -0.06671 |
| H | 0.58064  | -1.17691 | -1.41055 |
| H | 1.87413  | -0.08972 | 1.12611  |
| H | 2.37240  | 0.16468  | -0.52692 |
| H | -1.87413 | -0.08971 | -1.12611 |

### 21 $\omega$ .Br

|                                  |     |                   |                 |
|----------------------------------|-----|-------------------|-----------------|
| Electronic energy                | ... | -2887.19235791 Eh |                 |
| Zero point energy                | ... | 0.20352413 Eh     | 127.71 kcal/mol |
| Thermal vibrational correction   | ... | 0.00820686 Eh     | 5.15 kcal/mol   |
| Thermal rotational correction    | ... | 0.00141627 Eh     | 0.89 kcal/mol   |
| Thermal translational correction | ... | 0.00141627 Eh     | 0.89 kcal/mol   |
| Total Enthalpy                   | ... | -2886.97685016 Eh |                 |
| Final Gibbs free energy          | ... | -2887.02643281 Eh |                 |

|    |          |          |          |
|----|----------|----------|----------|
| C  | 2.25167  | -0.73464 | 0.52598  |
| H  | 2.09090  | -1.14771 | 1.51833  |
| C  | 2.22599  | 0.59502  | 0.36273  |
| H  | 2.07044  | 1.23146  | 1.23027  |
| C  | -2.43005 | -0.29689 | -0.83289 |
| C  | -2.62343 | 0.09153  | 0.52436  |
| H  | -2.86943 | -0.65265 | 1.27157  |
| H  | -2.52933 | -1.33675 | -1.11828 |
| C  | 2.58831  | -1.69651 | -0.57744 |
| H  | 3.28104  | -2.44562 | -0.18652 |
| H  | 1.69167  | -2.26183 | -0.86347 |
| C  | 2.49103  | 1.26822  | -0.95195 |
| H  | 1.78852  | 2.09432  | -1.09750 |
| H  | 3.47883  | 1.73926  | -0.89871 |
| C  | 2.43685  | 0.28903  | -2.12145 |
| H  | 1.39209  | 0.04561  | -2.35529 |
| H  | 2.84724  | 0.75541  | -3.01790 |
| C  | 3.19149  | -0.99410 | -1.79194 |
| H  | 3.19853  | -1.66819 | -2.64938 |
| H  | 4.23572  | -0.74682 | -1.57992 |
| H  | -2.48045 | 0.44455  | -1.62050 |
| H  | -2.82066 | 1.12801  | 0.76840  |
| Br | -0.60879 | -0.08211 | 0.11374  |

### TS21 $\omega$ .Br

|                                  |     |                   |                 |
|----------------------------------|-----|-------------------|-----------------|
| Electronic energy                | ... | -2887.19019747 Eh |                 |
| Zero point energy                | ... | 0.20303655 Eh     | 127.41 kcal/mol |
| Thermal vibrational correction   | ... | 0.00748965 Eh     | 4.70 kcal/mol   |
| Thermal rotational correction    | ... | 0.00141627 Eh     | 0.89 kcal/mol   |
| Thermal translational correction | ... | 0.00141627 Eh     | 0.89 kcal/mol   |
| Total Enthalpy                   | ... | -2886.97589451 Eh |                 |

Final Gibbs free energy ... -2887.02326453 Eh

|    |          |          |          |
|----|----------|----------|----------|
| C  | 2.00666  | -0.75039 | 0.49717  |
| H  | 1.81092  | -1.15864 | 1.48428  |
| C  | 1.98489  | 0.60170  | 0.33325  |
| H  | 1.80558  | 1.23073  | 1.20060  |
| C  | -2.55665 | -0.29842 | -0.82922 |
| C  | -2.73234 | 0.07859  | 0.48474  |
| H  | -2.90749 | -0.66039 | 1.25676  |
| H  | -2.58901 | -1.34192 | -1.11702 |
| C  | 2.44579  | -1.69720 | -0.57681 |
| H  | 3.10149  | -2.44139 | -0.11806 |
| H  | 1.57982  | -2.26523 | -0.93575 |
| C  | 2.36560  | 1.27019  | -0.94888 |
| H  | 1.68754  | 2.10375  | -1.14801 |
| H  | 3.34744  | 1.73078  | -0.78510 |
| C  | 2.42315  | 0.29704  | -2.12300 |
| H  | 1.40647  | 0.05731  | -2.45374 |
| H  | 2.91677  | 0.77375  | -2.96998 |
| C  | 3.14941  | -0.98555 | -1.73175 |
| H  | 3.22644  | -1.65919 | -2.58536 |
| H  | 4.17322  | -0.74164 | -1.43387 |
| H  | -2.54271 | 0.43929  | -1.62182 |
| H  | -2.86117 | 1.12045  | 0.75083  |
| Br | -0.48114 | -0.08499 | 0.11297  |

## 21.Br

|                                  |     |                   |                 |
|----------------------------------|-----|-------------------|-----------------|
| Electronic energy                | ... | -2887.20663017 Eh |                 |
| Zero point energy                | ... | 0.20266535 Eh     | 127.17 kcal/mol |
| Thermal vibrational correction   | ... | 0.00871423 Eh     | 5.47 kcal/mol   |
| Thermal rotational correction    | ... | 0.00141627 Eh     | 0.89 kcal/mol   |
| Thermal translational correction | ... | 0.00141627 Eh     | 0.89 kcal/mol   |
| Total Enthalpy                   | ... | -2886.99147383 Eh |                 |
| Final Gibbs free energy          | ... | -2887.04156519 Eh |                 |

|   |          |          |          |
|---|----------|----------|----------|
| C | 2.01605  | -0.77195 | 0.47877  |
| H | 1.99042  | -1.13409 | 1.50083  |
| C | 1.99735  | 0.66024  | 0.29232  |
| H | 1.98249  | 1.27936  | 1.18344  |
| C | -2.97718 | -0.27402 | -0.80084 |
| C | -3.12493 | 0.03807  | 0.48096  |
| H | -3.23881 | -0.72553 | 1.24246  |
| H | -2.96392 | -1.30512 | -1.13662 |
| C | 2.53243  | -1.70578 | -0.58147 |
| H | 3.22484  | -2.38284 | -0.07466 |
| H | 1.71674  | -2.34095 | -0.93209 |
| C | 2.46804  | 1.27740  | -0.98270 |
| H | 1.88611  | 2.17374  | -1.20105 |
| H | 3.48178  | 1.63076  | -0.74819 |
| C | 2.50990  | 0.29708  | -2.14908 |
| H | 1.49499  | 0.08013  | -2.49457 |

|    |          |          |          |
|----|----------|----------|----------|
| H  | 3.02505  | 0.76702  | -2.98624 |
| C  | 3.22497  | -0.98729 | -1.74368 |
| H  | 3.29249  | -1.67048 | -2.58950 |
| H  | 4.25286  | -0.74760 | -1.45755 |
| H  | -2.90944 | 0.48940  | -1.56802 |
| H  | -3.18426 | 1.06894  | 0.81221  |
| Br | 0.06270  | -0.09784 | 0.19752  |

### Bromiranium Ion 12.Br

|                                  |     |                   |                |
|----------------------------------|-----|-------------------|----------------|
| Electronic energy                | ... | -2808.60528663 Eh |                |
| Zero point energy                | ... | 0.14981689 Eh     | 94.01 kcal/mol |
| Thermal vibrational correction   | ... | 0.00396593 Eh     | 2.49 kcal/mol  |
| Thermal rotational correction    | ... | 0.00141627 Eh     | 0.89 kcal/mol  |
| Thermal translational correction | ... | 0.00141627 Eh     | 0.89 kcal/mol  |
| Total Enthalpy                   | ... | -2808.44772707 Eh |                |
| Final Gibbs free energy          | ... | -2808.48722630 Eh |                |

|    |          |          |          |
|----|----------|----------|----------|
| C  | -4.97760 | -1.60750 | -0.01116 |
| C  | -3.45381 | -1.62710 | 0.00992  |
| C  | -2.84457 | -0.27285 | 0.14453  |
| C  | -3.62142 | 0.85095  | 0.64495  |
| C  | -5.05269 | 0.69348  | 1.07594  |
| C  | -5.51580 | -0.76609 | 1.14141  |
| H  | -1.76416 | -0.20360 | 0.22387  |
| H  | -3.09476 | -2.16312 | 0.90022  |
| H  | -3.01673 | -2.14919 | -0.84228 |
| H  | -5.33816 | -1.22564 | -0.97075 |
| H  | -5.34381 | -2.63048 | 0.06720  |
| H  | -3.06277 | 1.69168  | 1.04276  |
| H  | -5.12321 | 1.16932  | 2.05763  |
| H  | -5.69303 | 1.29178  | 0.42480  |
| H  | -5.18328 | -1.20375 | 2.08688  |
| H  | -6.60468 | -0.78861 | 1.15847  |
| Br | -3.30990 | 1.02484  | -1.38971 |

### Ethene

|                                  |     |                 |                |
|----------------------------------|-----|-----------------|----------------|
| Electronic energy                | ... | -78.59191383 Eh |                |
| Zero point energy                | ... | 0.05139738 Eh   | 32.25 kcal/mol |
| Thermal vibrational correction   | ... | 0.00019779 Eh   | 0.12 kcal/mol  |
| Thermal rotational correction    | ... | 0.00141627 Eh   | 0.89 kcal/mol  |
| Thermal translational correction | ... | 0.00141627 Eh   | 0.89 kcal/mol  |
| Total Enthalpy                   | ... | -78.53654191 Eh |                |
| Final Gibbs free energy          | ... | -78.56137707 Eh |                |

|   |          |          |          |
|---|----------|----------|----------|
| C | 0.00001  | 0.66096  | 0.00000  |
| H | 0.92299  | 1.22952  | -0.00000 |
| H | -0.92295 | 1.22956  | -0.00000 |
| C | -0.00001 | -0.66096 | -0.00000 |
| H | -0.92299 | -1.22952 | -0.00000 |



|   |         |          |         |
|---|---------|----------|---------|
| H | 0.92295 | -1.22956 | 0.00000 |
|---|---------|----------|---------|

## 22.Br

|                                  |     |                   |                 |
|----------------------------------|-----|-------------------|-----------------|
| Electronic energy                | ... | -2887.23072259 Eh |                 |
| Zero point energy                | ... | 0.20622154 Eh     | 129.41 kcal/mol |
| Thermal vibrational correction   | ... | 0.00696310 Eh     | 4.37 kcal/mol   |
| Thermal rotational correction    | ... | 0.00141627 Eh     | 0.89 kcal/mol   |
| Thermal translational correction | ... | 0.00141627 Eh     | 0.89 kcal/mol   |
| Total Enthalpy                   | ... | -2887.01376120 Eh |                 |
| Final Gibbs free energy          | ... | -2887.06028008 Eh |                 |

|    |          |          |          |
|----|----------|----------|----------|
| C  | -1.17752 | -0.66578 | 0.26308  |
| H  | -0.95852 | -0.87354 | 1.30919  |
| C  | -0.71557 | 0.71755  | -0.14481 |
| H  | 0.37956  | 0.75659  | -0.08097 |
| H  | -0.93683 | 0.99382  | -1.17492 |
| C  | -1.59829 | 1.86296  | 0.69769  |
| C  | -2.26639 | 2.88812  | -0.19358 |
| C  | -0.31612 | 2.12011  | 1.21369  |
| C  | -1.25816 | 3.76017  | -0.93633 |
| H  | -2.89524 | 3.50865  | 0.45099  |
| H  | -2.94366 | 2.37892  | -0.88148 |
| C  | 0.53106  | 3.25636  | 0.78389  |
| H  | 0.05286  | 1.47893  | 2.01081  |
| C  | -0.23200 | 4.34600  | 0.02777  |
| H  | -0.75274 | 3.18529  | -1.71964 |
| H  | -1.78731 | 4.56197  | -1.45041 |
| H  | 0.99335  | 3.63995  | 1.70049  |
| H  | 1.37999  | 2.86883  | 0.20862  |
| H  | -0.74148 | 4.98891  | 0.75002  |
| H  | 0.47984  | 4.97839  | -0.50133 |
| H  | -2.26229 | 1.28415  | 1.33389  |
| H  | -2.24270 | -0.79377 | 0.08679  |
| Br | -0.24970 | -1.98287 | -0.79161 |

## 24.Br

|                                  |     |                   |                 |
|----------------------------------|-----|-------------------|-----------------|
| Electronic energy                | ... | -2887.25008081 Eh |                 |
| Zero point energy                | ... | 0.20615523 Eh     | 129.36 kcal/mol |
| Thermal vibrational correction   | ... | 0.00684771 Eh     | 4.30 kcal/mol   |
| Thermal rotational correction    | ... | 0.00141627 Eh     | 0.89 kcal/mol   |
| Thermal translational correction | ... | 0.00141627 Eh     | 0.89 kcal/mol   |
| Total Enthalpy                   | ... | -2887.03330111 Eh |                 |
| Final Gibbs free energy          | ... | -2887.07962898 Eh |                 |

|   |          |          |          |
|---|----------|----------|----------|
| C | 0.13519  | -0.34207 | 0.25889  |
| H | 0.93464  | 0.23600  | 0.71810  |
| C | -0.73357 | 0.51482  | -0.64343 |
| H | -0.19240 | 0.85120  | -1.53717 |
| H | -1.55307 | -0.08749 | -1.07796 |

|    |          |          |          |
|----|----------|----------|----------|
| C  | -1.43831 | 1.66119  | -0.06718 |
| C  | -2.00115 | 2.66141  | -0.96457 |
| C  | -1.44914 | 1.96253  | 1.35132  |
| C  | -0.98417 | 3.86388  | -0.87000 |
| H  | -2.96899 | 3.01692  | -0.60749 |
| H  | -2.07445 | 2.31524  | -1.99429 |
| C  | -0.39563 | 3.14349  | 1.45592  |
| H  | -1.14461 | 1.13417  | 1.98539  |
| C  | -0.80955 | 4.30669  | 0.57186  |
| H  | -0.02828 | 3.55676  | -1.30196 |
| H  | -1.38370 | 4.65515  | -1.50332 |
| H  | -0.35681 | 3.41182  | 2.51124  |
| H  | 0.59561  | 2.77558  | 1.17987  |
| H  | -1.73642 | 4.74950  | 0.94604  |
| H  | -0.04632 | 5.08585  | 0.62289  |
| H  | -2.41124 | 2.36235  | 1.67350  |
| H  | -0.44240 | -0.83303 | 1.03859  |
| Br | 0.97163  | -1.73155 | -0.77925 |

### TS25.Br

|                                  |     |                   |                 |
|----------------------------------|-----|-------------------|-----------------|
| Electronic energy                | ... | -2887.19806622 Eh |                 |
| Zero point energy                | ... | 0.20065052 Eh     | 125.91 kcal/mol |
| Thermal vibrational correction   | ... | 0.00644369 Eh     | 4.04 kcal/mol   |
| Thermal rotational correction    | ... | 0.00141627 Eh     | 0.89 kcal/mol   |
| Thermal translational correction | ... | 0.00141627 Eh     | 0.89 kcal/mol   |
| Total Enthalpy                   | ... | -2886.98719527 Eh |                 |
| Final Gibbs free energy          | ... | -2887.03231669 Eh |                 |

|    |          |          |          |
|----|----------|----------|----------|
| C  | -1.05498 | -0.85884 | 0.32583  |
| H  | -0.88827 | -0.81675 | 1.39679  |
| C  | -1.63510 | 0.35922  | -0.33057 |
| H  | -0.07236 | 0.44187  | -0.92549 |
| H  | -2.27390 | 0.17005  | -1.18753 |
| C  | -1.47163 | 1.63502  | 0.10711  |
| C  | -2.07256 | 2.77334  | -0.65523 |
| C  | -0.67083 | 2.02644  | 1.30877  |
| C  | -1.01397 | 3.82811  | -1.00540 |
| H  | -2.82755 | 3.22934  | -0.00415 |
| H  | -2.58955 | 2.41506  | -1.54593 |
| C  | 0.38150  | 3.08918  | 0.95149  |
| H  | -0.20397 | 1.17162  | 1.79895  |
| C  | -0.24361 | 4.27644  | 0.23048  |
| H  | -0.31979 | 3.41074  | -1.74355 |
| H  | -1.50326 | 4.67465  | -1.48769 |
| H  | 0.88386  | 3.40755  | 1.86527  |
| H  | 1.15182  | 2.63671  | 0.31645  |
| H  | -0.91687 | 4.80654  | 0.91170  |
| H  | 0.53355  | 4.98814  | -0.05169 |
| H  | -1.37580 | 2.45393  | 2.03072  |
| H  | -1.50102 | -1.79764 | 0.01628  |
| Br | 0.78967  | -0.83353 | -0.51231 |

## 26.Br

|                                  |     |                   |                 |
|----------------------------------|-----|-------------------|-----------------|
| Electronic energy                | ... | -2887.23921222 Eh |                 |
| Zero point energy                | ... | 0.20045264 Eh     | 125.79 kcal/mol |
| Thermal vibrational correction   | ... | 0.00886640 Eh     | 5.56 kcal/mol   |
| Thermal rotational correction    | ... | 0.00141627 Eh     | 0.89 kcal/mol   |
| Thermal translational correction | ... | 0.00141627 Eh     | 0.89 kcal/mol   |
| Total Enthalpy                   | ... | -2887.02611642 Eh |                 |
| Final Gibbs free energy          | ... | -2887.07704605 Eh |                 |

|    |          |          |          |
|----|----------|----------|----------|
| C  | -1.35547 | -0.60806 | 0.27892  |
| H  | -0.89329 | -0.58562 | 1.25692  |
| C  | -1.83506 | 0.49662  | -0.32882 |
| H  | 1.98642  | -1.04362 | -1.69203 |
| H  | -2.32737 | 0.40703  | -1.29028 |
| C  | -1.74230 | 1.79124  | 0.23652  |
| C  | -2.29068 | 2.93787  | -0.49886 |
| C  | -0.97529 | 2.11985  | 1.44549  |
| C  | -1.06586 | 3.77775  | -0.99150 |
| H  | -2.87262 | 3.56858  | 0.17858  |
| H  | -2.91572 | 2.63369  | -1.33636 |
| C  | 0.25684  | 2.96104  | 0.97854  |
| H  | -0.64528 | 1.25142  | 2.00892  |
| C  | -0.18176 | 4.17734  | 0.17884  |
| H  | -0.49923 | 3.19044  | -1.71896 |
| H  | -1.46296 | 4.64541  | -1.51787 |
| H  | 0.81409  | 3.24231  | 1.87185  |
| H  | 0.91040  | 2.32282  | 0.37758  |
| H  | -0.71699 | 4.87788  | 0.82647  |
| H  | 0.69886  | 4.70405  | -0.19383 |
| H  | -1.58716 | 2.75161  | 2.09477  |
| H  | -1.44532 | -1.58205 | -0.18745 |
| Br | 1.97653  | -0.69866 | -0.31531 |

## Product 14

|                                  |     |                  |                 |
|----------------------------------|-----|------------------|-----------------|
| Electronic energy                | ... | -312.41132431 Eh |                 |
| Zero point energy                | ... | 0.19320148 Eh    | 121.24 kcal/mol |
| Thermal vibrational correction   | ... | 0.00511275 Eh    | 3.21 kcal/mol   |
| Thermal rotational correction    | ... | 0.00141627 Eh    | 0.89 kcal/mol   |
| Thermal translational correction | ... | 0.00141627 Eh    | 0.89 kcal/mol   |
| Total Enthalpy                   | ... | -312.20923334 Eh |                 |
| Final Gibbs free energy          | ... | -312.25011695 Eh |                 |

|   |          |          |          |
|---|----------|----------|----------|
| C | -1.15787 | -0.64786 | 0.50257  |
| H | -0.29318 | -0.59784 | 1.15259  |
| C | -1.84742 | 0.44289  | 0.11937  |
| H | -2.72734 | 0.32736  | -0.50325 |
| C | -1.51595 | 1.76103  | 0.53710  |
| C | -2.37190 | 2.87680  | 0.12354  |
| C | -0.27599 | 2.12816  | 1.22917  |

|   |          |          |          |
|---|----------|----------|----------|
| C | -1.54425 | 3.70591  | -0.91737 |
| H | -2.57055 | 3.53011  | 0.97708  |
| H | -3.31342 | 2.54081  | -0.30648 |
| C | 0.57228  | 2.96689  | 0.21475  |
| H | 0.30081  | 1.27911  | 1.58536  |
| C | -0.21952 | 4.14946  | -0.31878 |
| H | -1.38166 | 3.09798  | -1.81116 |
| H | -2.16276 | 4.55269  | -1.21372 |
| H | 1.47241  | 3.28613  | 0.73942  |
| H | 0.88914  | 2.31410  | -0.60275 |
| H | -0.39625 | 4.87306  | 0.48205  |
| H | 0.36834  | 4.66368  | -1.08170 |
| H | -0.51782 | 2.77625  | 2.07569  |
| H | -1.46547 | -1.63627 | 0.18131  |

### HBr

|                                  |     |                   |      |
|----------------------------------|-----|-------------------|------|
| Electronic energy                | ... | -2574.82066682 Eh |      |
| Zero point energy                | ... | 0.00614723 Eh     | 3.86 |
| kcal/mol                         |     |                   |      |
| Thermal vibrational correction   | ... | 0.00000003 Eh     | 0.00 |
| kcal/mol                         |     |                   |      |
| Thermal rotational correction    | ... | 0.00094418 Eh     | 0.59 |
| kcal/mol                         |     |                   |      |
| Thermal translational correction | ... | 0.00141627 Eh     | 0.89 |
| kcal/mol                         |     |                   |      |
| Total Enthalpy                   | ... | -2574.81121490 Eh |      |
| Final Gibbs free energy          | ... | -2574.83375306 Eh |      |

|    |          |         |         |
|----|----------|---------|---------|
| Br | -5.39628 | 0.60327 | 0.00000 |
| H  | -6.81323 | 0.60327 | 0.00000 |

### 30.Br

|                                  |     |                   |                 |
|----------------------------------|-----|-------------------|-----------------|
| Electronic energy                | ... | -2887.22582111 Eh |                 |
| Zero point energy                | ... | 0.20694304 Eh     | 129.86 kcal/mol |
| Thermal vibrational correction   | ... | 0.00671764 Eh     | 4.22 kcal/mol   |
| Thermal rotational correction    | ... | 0.00141627 Eh     | 0.89 kcal/mol   |
| Thermal translational correction | ... | 0.00141627 Eh     | 0.89 kcal/mol   |
| Total Enthalpy                   | ... | -2887.00838368 Eh |                 |
| Final Gibbs free energy          | ... | -2887.05424209 Eh |                 |

|   |          |          |          |
|---|----------|----------|----------|
| C | -0.83495 | 0.35004  | 0.44461  |
| H | -0.68873 | -0.46707 | 1.14563  |
| C | 0.36132  | 0.58094  | -0.46335 |
| H | 1.25561  | 0.81375  | 0.10819  |
| H | 0.18304  | 1.35792  | -1.20034 |
| C | -2.41853 | 1.43696  | 0.93380  |
| C | -3.04666 | 2.24574  | -0.12564 |
| C | -1.12492 | 1.67725  | 1.44031  |
| C | -2.14680 | 3.33112  | -0.70430 |

|    |          |          |          |
|----|----------|----------|----------|
| H  | -3.89921 | 2.69735  | 0.40915  |
| H  | -3.51632 | 1.60539  | -0.87678 |
| C  | -0.42834 | 2.99648  | 1.11894  |
| H  | -0.93233 | 1.29155  | 2.43510  |
| C  | -1.34539 | 3.99447  | 0.41025  |
| H  | -1.47830 | 2.90463  | -1.45725 |
| H  | -2.76386 | 4.06113  | -1.22712 |
| H  | -0.08102 | 3.41065  | 2.06551  |
| H  | 0.47192  | 2.82494  | 0.52928  |
| H  | -2.03692 | 4.43437  | 1.13565  |
| H  | -0.74895 | 4.81622  | 0.01591  |
| H  | -3.01692 | 0.65660  | 1.39800  |
| H  | -1.66590 | 0.02739  | -0.20109 |
| Br | 0.70430  | -1.05095 | -1.42809 |

### TS31.Br

|                                  |     |                   |                 |
|----------------------------------|-----|-------------------|-----------------|
| Electronic energy                | ... | -2887.17992610 Eh |                 |
| Zero point energy                | ... | 0.20174162 Eh     | 126.59 kcal/mol |
| Thermal vibrational correction   | ... | 0.00725148 Eh     | 4.55 kcal/mol   |
| Thermal rotational correction    | ... | 0.00141627 Eh     | 0.89 kcal/mol   |
| Thermal translational correction | ... | 0.00141627 Eh     | 0.89 kcal/mol   |
| Total Enthalpy                   | ... | -2886.96715625 Eh |                 |
| Final Gibbs free energy          | ... | -2887.01460569 Eh |                 |

|    |          |          |          |
|----|----------|----------|----------|
| C  | -0.21926 | -0.10002 | -0.27176 |
| H  | -0.17726 | -0.61752 | 0.67868  |
| C  | 0.71620  | 0.98845  | -0.48591 |
| H  | 1.65054  | 1.01597  | 0.06162  |
| H  | 0.58966  | 1.65836  | -1.32779 |
| C  | -2.80594 | 1.71215  | 1.33700  |
| C  | -3.37243 | 2.49631  | 0.19390  |
| C  | -1.54997 | 1.82700  | 1.76911  |
| C  | -2.29443 | 3.18591  | -0.63772 |
| H  | -4.06866 | 3.23683  | 0.60390  |
| H  | -3.98729 | 1.84394  | -0.43124 |
| C  | -0.58890 | 2.78741  | 1.16360  |
| H  | -1.21946 | 1.25189  | 2.62790  |
| C  | -1.23199 | 3.81992  | 0.25315  |
| H  | -1.82589 | 2.45302  | -1.30727 |
| H  | -2.74151 | 3.93731  | -1.28877 |
| H  | 0.06156  | 3.23976  | 1.91576  |
| H  | 0.18251  | 2.20172  | 0.54356  |
| H  | -1.69518 | 4.57827  | 0.89200  |
| H  | -0.47509 | 4.33996  | -0.33710 |
| H  | -3.48166 | 1.04667  | 1.86526  |
| H  | -1.21137 | 0.00150  | -0.69323 |
| Br | 0.94275  | -1.02549 | -1.56266 |

### 32.Br

|                   |     |                   |  |
|-------------------|-----|-------------------|--|
| Electronic energy | ... | -2887.23897873 Eh |  |
|-------------------|-----|-------------------|--|

|                                  |     |                   |                 |
|----------------------------------|-----|-------------------|-----------------|
| Zero point energy                | ... | 0.20296869 Eh     | 127.36 kcal/mol |
| Thermal vibrational correction   | ... | 0.00848085 Eh     | 5.32 kcal/mol   |
| Thermal rotational correction    | ... | 0.00141627 Eh     | 0.89 kcal/mol   |
| Thermal translational correction | ... | 0.00141627 Eh     | 0.89 kcal/mol   |
| Total Enthalpy                   | ... | -2887.02375244 Eh |                 |
| Final Gibbs free energy          | ... | -2887.07343740 Eh |                 |

|    |          |          |          |
|----|----------|----------|----------|
| C  | 0.34392  | -0.18887 | 0.16766  |
| H  | 0.70811  | -1.20653 | 0.28067  |
| C  | 1.20605  | 0.64426  | -0.74888 |
| H  | 1.29196  | 0.19601  | -1.73796 |
| H  | 0.81386  | 1.65545  | -0.86171 |
| C  | -2.88658 | 1.62099  | 0.89709  |
| C  | -3.28752 | 2.46440  | -0.24001 |
| C  | -1.91425 | 2.02592  | 1.81828  |
| C  | -2.18638 | 3.40965  | -0.69167 |
| H  | -4.16655 | 3.01593  | 0.14019  |
| H  | -3.67717 | 1.85238  | -1.05380 |
| C  | -1.32105 | 3.24183  | 1.65611  |
| H  | -1.72077 | 1.42378  | 2.69608  |
| C  | -1.55458 | 4.12642  | 0.49604  |
| H  | -1.42404 | 2.82506  | -1.21260 |
| H  | -2.57508 | 4.13134  | -1.40813 |
| H  | -0.67376 | 3.61226  | 2.44677  |
| H  | 2.20782  | 0.71587  | -0.32011 |
| H  | -2.19517 | 4.94249  | 0.86730  |
| H  | -0.61836 | 4.62100  | 0.22503  |
| H  | -3.51332 | 0.77205  | 1.14862  |
| H  | 0.23174  | 0.25433  | 1.15544  |
| Br | -1.47364 | -0.40128 | -0.52334 |

### Cyclohexenium Ion 15

|                                  |     |                  |                |
|----------------------------------|-----|------------------|----------------|
| Electronic energy                | ... | -233.77035858 Eh |                |
| Zero point energy                | ... | 0.13483417 Eh    | 84.61 kcal/mol |
| Thermal vibrational correction   | ... | 0.00264373 Eh    | 1.66 kcal/mol  |
| Thermal rotational correction    | ... | 0.00141627 Eh    | 0.89 kcal/mol  |
| Thermal translational correction | ... | 0.00141627 Eh    | 0.89 kcal/mol  |
| Total Enthalpy                   | ... | -233.62910393 Eh |                |
| Final Gibbs free energy          | ... | -233.66406878 Eh |                |

|   |          |          |          |
|---|----------|----------|----------|
| C | -3.82995 | -0.88871 | -0.09247 |
| C | -2.31083 | -0.98879 | -0.05419 |
| C | -1.66012 | 0.23062  | 0.43727  |
| C | -2.30974 | 1.20602  | 1.16439  |
| C | -3.59676 | 0.94583  | 1.58634  |
| C | -4.36898 | -0.23023 | 1.17063  |
| H | -0.59110 | 0.33787  | 0.26706  |
| H | -1.96058 | -1.78754 | 0.62498  |
| H | -1.88281 | -1.26516 | -1.02166 |
| H | -4.12232 | -0.28671 | -0.95626 |
| H | -4.27400 | -1.87313 | -0.22836 |

|   |          |          |         |
|---|----------|----------|---------|
| H | -1.78040 | 2.08320  | 1.51150 |
| H | -4.04686 | 1.61495  | 2.31641 |
| H | -4.34161 | -0.90857 | 2.04303 |
| H | -5.42513 | 0.03997  | 1.08635 |

### Bromoethane

|                                  |     |                   |                |
|----------------------------------|-----|-------------------|----------------|
| Electronic energy                | ... | -2653.45318145 Eh |                |
| Zero point energy                | ... | 0.06649846 Eh     | 41.73 kcal/mol |
| Thermal vibrational correction   | ... | 0.00130183 Eh     | 0.82 kcal/mol  |
| Thermal rotational correction    | ... | 0.00141627 Eh     | 0.89 kcal/mol  |
| Thermal translational correction | ... | 0.00141627 Eh     | 0.89 kcal/mol  |
| Total Enthalpy                   | ... | -2653.38160442 Eh |                |
| Final Gibbs free energy          | ... | -2653.41409937 Eh |                |

|    |          |          |          |
|----|----------|----------|----------|
| C  | -1.70454 | 0.34204  | 0.00021  |
| H  | -1.33928 | -0.68816 | -0.00427 |
| H  | -1.35248 | 0.83288  | -0.90722 |
| H  | -2.79419 | 0.31876  | -0.02229 |
| C  | -1.19820 | 1.04969  | 1.23591  |
| H  | -1.56136 | 0.58966  | 2.15171  |
| H  | -0.11249 | 1.09615  | 1.26842  |
| Br | -1.80108 | 2.89948  | 1.30638  |

**Table S7:** Comparison of M06-2X-D3 and  $\omega$ B97X-D3 relative enthalpies ( $\Delta H^0$ ) for key species involved in the addition pathways from **Figure 3** (in kJ mol<sup>-1</sup>)

|                             |                     | <b>22.Br</b> | <b>24.Br</b> | <b>TS25.Br</b> | <b>26.Br</b> | <b>Products</b> |
|-----------------------------|---------------------|--------------|--------------|----------------|--------------|-----------------|
| <b>Addition-Elimination</b> | M06-2X-D3           | -138.2       | -186.1       | -69.3          | -167.2       | -154.5          |
|                             | $\omega$ B97X-D3    | -142.5       | -193.5       | -71.4          | -179.9       | -163.9          |
|                             | Absolute Difference | 4.3          | 7.4          | 2.1            | 12.7         | 9.4             |
|                             |                     | <b>28.Br</b> | <b>30.Br</b> | <b>TS31.Br</b> | <b>32.Br</b> | <b>Products</b> |
| <b>Hydride Transfer</b>     | M06-2X-D3           | -136.8       | -126.1       | -25.4          | -166.2       | -125.3          |
|                             | $\omega$ B97X-D3    | -140.4       | -127.7       | -20.9          | -172.7       | -136.5          |
|                             | Absolute Difference | 3.6          | 1.6          | 4.5            | 6.5          | 11.2            |

### References

- Olsen, J. V.; Schwartz, J. C.; Griep-Raming, J.; Nielsen, M. L.; Damoc, E.; Denisov, E.; Lange, O.; Remes, P.; Taylor, D.; Splendore, M.; Wouters, E. R.; Senko, M.; Makarov, A.; Mann, M.; Horning, S., A Dual Pressure Linear Ion Trap Orbitrap Instrument with Very High Sequencing Speed\*. *Mol. Cell. Proteom.* **2009**, *8* (12), 2759-2769.
- Waters, T.; O'Hair, R. A. J.; Wedd, A. G., Catalytic Gas Phase Oxidation of Methanol to Formaldehyde. *J. Am. Chem. Soc.* **2003**, *125* (11), 3384-3396.
- Miller, K. J., Additivity methods in molecular polarizability. *J. Am. Chem. Soc.* **1990**, *112* (23), 8533-8542.
- NIST Computational Chemistry Comparison and Benchmark Database. <http://cccbdb.nist.gov/> (accessed 6 August).

5. Allinger, N. L., On the Molecular Geometry of trans-Cycloöctene. *J. Am. Chem. Soc.* **1958**, *80* (8), 1953-1955.
6. Van Nhu, N.; Kohler, F., Excess properties of mixtures of polar components and hydrocarbons of varying local polarisability. *Fluid Phase Equilb.* **1989**, *50* (3), 267-296.
